# Supplementary material for: MU-LOC: A Machine-Learning Method for Predicting Mitochondrially Localized Proteins in Plants
Source: Front Plant Sci. 2018 May 23;9:634. doi: 10.3389/fpls.2018.00634 (PMC5974146; doi:10.3389/fpls.2018.00634)
Supplement: Supplementary file 2 [file Table_9.XLSX]

## Sheet: Arabidopsis_mito_prediction_GO
Supplementary Table S9. Lists of predicted mitochondrial proteins in Arabidopsis and potato at estimated specificity level of 0.95. (A) Predicted Arabidopsis mitochondrial proteins with gene ontology annotation.
Protein ID	GO Category	GO Term ID	GO Term Name	GO Category	GO Term ID	GO Term Name	GO Category	GO Term ID	GO Term Name	GO Category	GO Term ID	GO Term Name	GO Category	GO Term ID	GO Term Name	GO Category	GO Term ID	GO Term Name	GO Category	GO Term ID	GO Term Name	GO Category	GO Term ID	GO Term Name	GO Category	GO Term ID	GO Term Name	GO Category	GO Term ID	GO Term Name	GO Category	GO Term ID	GO Term Name	GO Category	GO Term ID	GO Term Name	GO Category	GO Term ID	GO Term Name	GO Category	GO Term ID	GO Term Name	GO Category	GO Term ID	GO Term Name	GO Category	GO Term ID	GO Term Name	GO Category
ATCG00050	C	GO:0000312|plastid small ribosomal subunit(TAS)	other intracellular components	P	GO:0006091|generation of precursor metabolites and energy(RCA)	electron transport or energy pathways	F	GO:0003735|structural constituent of ribosome(TAS)	structural molecule activity	P	GO:0015979|photosynthesis(RCA)	other cellular processes	C	GO:0000312|plastid small ribosomal subunit(TAS)	other cytoplasmic components	P	GO:0035196|production of miRNAs involved in gene silencing by miRNA(RCA)	other metabolic processes	P	GO:0035196|production of miRNAs involved in gene silencing by miRNA(RCA)	other cellular processes	P	GO:0006354|DNA-templated transcription, elongation(RCA)	other cellular processes	P	GO:0010267|production of ta-siRNAs involved in RNA interference(RCA)	other metabolic processes	P	GO:0006412|translation(TAS)	other cellular processes	P	GO:0006412|translation(TAS)	protein metabolism	P	GO:0006354|DNA-templated transcription, elongation(RCA)	transcription,DNA-dependent	P	GO:0051607|defense response to virus(RCA)	response to abiotic or biotic stimulus	P	GO:0010267|production of ta-siRNAs involved in RNA interference(RCA)	other cellular processes	C	GO:0000312|plastid small ribosomal subunit(TAS)	plastid	C	GO:0009507|chloroplast(ISM)	chloroplast	C
AT1G77170	C	GO:0005739|mitochondrion(ISM)	mitochondria	P	GO:0008150|biological_process(ND)	unknown biological processes	F	GO:0003674|molecular_function(ND)	unknown molecular functions
AT1G62350	F	GO:0003674|molecular_function(ND)	unknown molecular functions	C	GO:0005739|mitochondrion(ISM)	mitochondria	P	GO:0008150|biological_process(ND)	unknown biological processes
AT2G40240	F	GO:0003674|molecular_function(ND)	unknown molecular functions	C	GO:0005739|mitochondrion(ISM)	mitochondria	P	GO:0008150|biological_process(ND)	unknown biological processes	C	GO:0005739|mitochondrion(IDA)	mitochondria
AT1G60770	P	GO:0008150|biological_process(ND)	unknown biological processes	C	GO:0005739|mitochondrion(IDA)	mitochondria	C	GO:0005739|mitochondrion(ISM)	mitochondria
AT1G80270	P	GO:0009220|pyrimidine ribonucleotide biosynthetic process(RCA)	other metabolic processes	P	GO:0006606|protein import into nucleus(RCA)	transport	C	GO:0005739|mitochondrion(ISM)	mitochondria	P	GO:0009220|pyrimidine ribonucleotide biosynthetic process(RCA)	other cellular processes	C	GO:0009941|chloroplast envelope(IDA)	other intracellular components	P	GO:0008150|biological_process(ND)	unknown biological processes	C	GO:0009941|chloroplast envelope(IDA)	other cytoplasmic components	F	GO:0003677|DNA binding(ISS)	DNA or RNA binding	C	GO:0009941|chloroplast envelope(IDA)	chloroplast	C	GO:0009941|chloroplast envelope(IDA)	plastid	C	GO:0005739|mitochondrion(IDA)	mitochondria	C	GO:0005739|mitochondrion(ISM)	mitochondria	C	GO:0005739|mitochondrion(ISM)	mitochondria
AT1G07740	C	GO:0005739|mitochondrion(ISM)	mitochondria	F	GO:0003674|molecular_function(ND)	unknown molecular functions	P	GO:0008150|biological_process(ND)	unknown biological processes
ATCG00790	P	GO:0006412|translation(TAS)	other metabolic processes	P	GO:0006412|translation(TAS)	other cellular processes	P	GO:0019684|photosynthesis, light reaction(RCA)	other cellular processes	C	GO:0000311|plastid large ribosomal subunit(TAS)	plastid	C	GO:0000311|plastid large ribosomal subunit(TAS)	other cytoplasmic components	P	GO:0019684|photosynthesis, light reaction(RCA)	other metabolic processes	P	GO:0006412|translation(TAS)	protein metabolism	P	GO:0019684|photosynthesis, light reaction(RCA)	electron transport or energy pathways	C	GO:0000311|plastid large ribosomal subunit(TAS)	ribosome	C	GO:0009570|chloroplast stroma(IDA)	plastid	C	GO:0009507|chloroplast(ISM)	chloroplast	P	GO:0006354|DNA-templated transcription, elongation(RCA)	other metabolic processes	P	GO:0015979|photosynthesis(RCA)	other metabolic processes	C	GO:0009941|chloroplast envelope(IDA)	other intracellular components	C	GO:0009570|chloroplast stroma(IDA)	other cytoplasmic components	C	GO:0009570|chloroplast stroma(IDA)	other intracellular components	C
AT1G22960	C	GO:0005739|mitochondrion(ISM)	mitochondria
AT3G62470	C	GO:0005739|mitochondrion(ISM)	mitochondria	F	GO:0003674|molecular_function(ND)	unknown molecular functions	P	GO:0008150|biological_process(ND)	unknown biological processes
AT4G02750	C	GO:0005739|mitochondrion(ISM)	mitochondria
AT1G62670	P	GO:0000966|RNA 5'-end processing(IMP)	other cellular processes	C	GO:0005739|mitochondrion(ISM)	mitochondria	P	GO:0000966|RNA 5'-end processing(IMP)	other cellular processes	F	GO:0003723|RNA binding(IDA)	DNA or RNA binding	P	GO:0000966|RNA 5'-end processing(IMP)	other metabolic processes	C	GO:0005739|mitochondrion(IDA)	mitochondria	P	GO:0000966|RNA 5'-end processing(IMP)	other metabolic processes
AT1G80150	P	GO:0008150|biological_process(ND)	unknown biological processes	C	GO:0005739|mitochondrion(ISM)	mitochondria	F	GO:0003674|molecular_function(ND)	unknown molecular functions
AT1G11710	C	GO:0005739|mitochondrion(ISM)	mitochondria	F	GO:0003674|molecular_function(ND)	unknown molecular functions	P	GO:0008150|biological_process(ND)	unknown biological processes
AT2G33040	C	GO:0005753|mitochondrial proton-transporting ATP synthase complex(IDA)	mitochondria	C	GO:0005753|mitochondrial proton-transporting ATP synthase complex(IDA)	other membranes	P	GO:0051788|response to misfolded protein(RCA)	response to stress	P	GO:0006511|ubiquitin-dependent protein catabolic process(RCA)	other metabolic processes	F	GO:0008270|zinc ion binding(IDA)	other binding	C	GO:0009507|chloroplast(IDA)	chloroplast	C	GO:0005739|mitochondrion(ISM)	mitochondria	C	GO:0005753|mitochondrial proton-transporting ATP synthase complex(IDA)	other intracellular components	P	GO:0009853|photorespiration(RCA)	other metabolic processes	P	GO:0019243|methylglyoxal catabolic process to D-lactate(RCA)	other cellular processes	C	GO:0005730|nucleolus(IDA)	other intracellular components	C	GO:0005618|cell wall(IDA)	cell wall	P	GO:0019243|methylglyoxal catabolic process to D-lactate(RCA)	other metabolic processes	C	GO:0005739|mitochondrion(IDA)	mitochondria	C	GO:0005730|nucleolus(IDA)	nucleus	C	GO:0005739|mitochondrion(IDA)	mitochondria	P
AT3G62540	F	GO:0003674|molecular_function(ND)	unknown molecular functions	P	GO:0008150|biological_process(ND)	unknown biological processes	C	GO:0005739|mitochondrion(ISM)	mitochondria
AT5G14820	C	GO:0005739|mitochondrion(ISM)	mitochondria	F	GO:0003674|molecular_function(ND)	unknown molecular functions	P	GO:0008150|biological_process(ND)	unknown biological processes
AT5G01110	C	GO:0005739|mitochondrion(ISM)	mitochondria
AT1G28000	F	GO:0003674|molecular_function(ND)	unknown molecular functions	P	GO:0008150|biological_process(ND)	unknown biological processes
AT1G71060	P	GO:0008150|biological_process(ND)	unknown biological processes	C	GO:0005739|mitochondrion(ISM)	mitochondria
AT3G22670	P	GO:0008150|biological_process(ND)	unknown biological processes	C	GO:0005739|mitochondrion(ISM)	mitochondria
AT3G18020	P	GO:0008150|biological_process(ND)	unknown biological processes	C	GO:0005739|mitochondrion(ISM)	mitochondria	F	GO:0003674|molecular_function(ND)	unknown molecular functions
AT1G09220	C	GO:0022626|cytosolic ribosome(IDA)	cytosol	C	GO:0005739|mitochondrion(ISM)	mitochondria	C	GO:0022626|cytosolic ribosome(IDA)	other cytoplasmic components	P	GO:0008150|biological_process(ND)	unknown biological processes	C	GO:0022626|cytosolic ribosome(IDA)	ribosome	C	GO:0022626|cytosolic ribosome(IDA)	other intracellular components
AT3G14580	F	GO:0003674|molecular_function(ND)	unknown molecular functions	P	GO:0008150|biological_process(ND)	unknown biological processes	C	GO:0005739|mitochondrion(ISM)	mitochondria
AT1G69350	C	GO:0005739|mitochondrion(ISM)	mitochondria	F	GO:0003674|molecular_function(ND)	unknown molecular functions	P	GO:0008150|biological_process(ND)	unknown biological processes
AT1G16830	F	GO:0003674|molecular_function(ND)	unknown molecular functions	P	GO:0008150|biological_process(ND)	unknown biological processes	C	GO:0005739|mitochondrion(ISM)	mitochondria
AT5G55070	C	GO:0005739|mitochondrion(IDA)	mitochondria	P	GO:0046686|response to cadmium ion(RCA)	other biological processes	P	GO:0006979|response to oxidative stress(IDA)	response to stress	C	GO:0005739|mitochondrion(IDA)	mitochondria	C	GO:0005739|mitochondrion(IDA)	mitochondria	C	GO:0022626|cytosolic ribosome(IDA)	other cytoplasmic components	C	GO:0022626|cytosolic ribosome(IDA)	other intracellular components	F	GO:0016746|transferase activity, transferring acyl groups(ISS)	transferase activity	C	GO:0022626|cytosolic ribosome(IDA)	cytosol	C	GO:0005739|mitochondrion(ISM)	mitochondria	C	GO:0022626|cytosolic ribosome(IDA)	ribosome	P	GO:0008152|metabolic process(ISS)	other metabolic processes	C	GO:0005739|mitochondrion(IDA)	mitochondria	C	GO:0005739|mitochondrion(IDA)	mitochondria	F	GO:0008270|zinc ion binding(IDA)	other binding	C	GO:0005739|mitochondrion(IDA)	mitochondria
AT5G27820	P	GO:0006354|DNA-templated transcription, elongation(RCA)	transcription,DNA-dependent	P	GO:0006354|DNA-templated transcription, elongation(RCA)	other cellular processes	C	GO:0009507|chloroplast(ISM)	chloroplast	F	GO:0003735|structural constituent of ribosome(ISS)	structural molecule activity	P	GO:0042254|ribosome biogenesis(ISS)	other biological processes	C	GO:0005840|ribosome(ISS)	ribosome	P	GO:0006354|DNA-templated transcription, elongation(RCA)	other metabolic processes
AT3G01800	P	GO:0006412|translation(ISS)	protein metabolism	C	GO:0005739|mitochondrion(ISM)	mitochondria	P	GO:0019408|dolichol biosynthetic process(RCA)	other metabolic processes	C	GO:0005739|mitochondrion(IDA)	mitochondria	P	GO:0019408|dolichol biosynthetic process(RCA)	other cellular processes	P	GO:0006626|protein targeting to mitochondrion(RCA)	transport	P	GO:0006412|translation(ISS)	other cellular processes	P	GO:0006626|protein targeting to mitochondrion(RCA)	other cellular processes	P	GO:0006626|protein targeting to mitochondrion(RCA)	cell organization and biogenesis	P	GO:0006412|translation(ISS)	other metabolic processes
AT1G62720	C	GO:0005739|mitochondrion(ISM)	mitochondria	C	GO:0005739|mitochondrion(IDA)	mitochondria	P	GO:0009845|seed germination(IMP)	developmental processes
AT1G12620	P	GO:0008150|biological_process(ND)	unknown biological processes	C	GO:0005739|mitochondrion(ISM)	mitochondria
AT2G38660	C	GO:0005737|cytoplasm(ISM)	other cytoplasmic components	C	GO:0005737|cytoplasm(ISM)	other cytoplasmic components	F	GO:0003824|catalytic activity(ISS)	other enzyme activity	P	GO:0009396|folic acid-containing compound biosynthetic process(ISS)	other cellular processes	P	GO:0009396|folic acid-containing compound biosynthetic process(ISS)	other metabolic processes	C	GO:0005737|cytoplasm(ISM)	other cytoplasmic components	C	GO:0005739|mitochondrion(ISM)	mitochondria
AT1G55890	P	GO:0008150|biological_process(ND)	unknown biological processes	C	GO:0005739|mitochondrion(ISM)	mitochondria	C	GO:0005739|mitochondrion(IDA)	mitochondria
AT4G32430	C	GO:0005739|mitochondrion(ISM)	mitochondria	P	GO:0008150|biological_process(ND)	unknown biological processes	F	GO:0003674|molecular_function(ND)	unknown molecular functions
AT1G56350	P	GO:0048825|cotyledon development(RCA)	developmental processes	P	GO:0009640|photomorphogenesis(RCA)	response to abiotic or biotic stimulus	P	GO:0016567|protein ubiquitination(RCA)	other metabolic processes	P	GO:0016567|protein ubiquitination(RCA)	other cellular processes	P	GO:0016567|protein ubiquitination(RCA)	protein metabolism	P	GO:0010182|sugar mediated signaling pathway(RCA)	other cellular processes	P	GO:0009933|meristem structural organization(RCA)	developmental processes	P	GO:0006415|translational termination(ISS)	other metabolic processes	P	GO:0010162|seed dormancy process(RCA)	developmental processes	P	GO:0051301|cell division(RCA)	other cellular processes	P	GO:0009909|regulation of flower development(RCA)	developmental processes	P	GO:0006415|translational termination(ISS)	cell organization and biogenesis	P	GO:0009640|photomorphogenesis(RCA)	developmental processes	P	GO:0050826|response to freezing(RCA)	response to stress	F	GO:0003747|translation release factor activity(ISS)	DNA or RNA binding	P	GO:0009793|embryo development ending in seed dormancy(RCA)	developmental processes	P
AT4G35260	P	GO:0009651|response to salt stress(RCA)	response to stress	P	GO:0006102|isocitrate metabolic process(IMP)	other metabolic processes	P	GO:0006099|tricarboxylic acid cycle(TAS)	other metabolic processes	P	GO:0009060|aerobic respiration(RCA)	electron transport or energy pathways	P	GO:0006096|glycolytic process(RCA)	other cellular processes	C	GO:0005739|mitochondrion(ISM)	mitochondria	P	GO:0009060|aerobic respiration(RCA)	other metabolic processes	P	GO:0006096|glycolytic process(RCA)	other metabolic processes	C	GO:0005739|mitochondrion(IDA)	mitochondria	P	GO:0006096|glycolytic process(RCA)	electron transport or energy pathways	P	GO:0006098|pentose-phosphate shunt(RCA)	other metabolic processes	P	GO:0006102|isocitrate metabolic process(IMP)	other cellular processes	F	GO:0004449|isocitrate dehydrogenase (NAD+) activity(ISS)	other enzyme activity	C	GO:0005739|mitochondrion(IDA)	mitochondria	P	GO:0006099|tricarboxylic acid cycle(TAS)	electron transport or energy pathways	P	GO:0009853|photorespiration(RCA)	other metabolic processes	C
AT1G09190	P	GO:0008150|biological_process(ND)	unknown biological processes	C	GO:0005739|mitochondrion(ISM)	mitochondria	F	GO:0003674|molecular_function(ND)	unknown molecular functions
AT5G46160	C	GO:0009507|chloroplast(ISM)	chloroplast	P	GO:0006412|translation(ISS)	other cellular processes	P	GO:0006354|DNA-templated transcription, elongation(RCA)	other metabolic processes	P	GO:0006412|translation(ISS)	protein metabolism	P	GO:0009086|methionine biosynthetic process(RCA)	other metabolic processes	P	GO:0006354|DNA-templated transcription, elongation(RCA)	transcription,DNA-dependent	P	GO:0006354|DNA-templated transcription, elongation(RCA)	other cellular processes	P	GO:0009086|methionine biosynthetic process(RCA)	other cellular processes	P	GO:0006412|translation(ISS)	other metabolic processes	P	GO:0000394|RNA splicing, via endonucleolytic cleavage and ligation(RCA)	other metabolic processes	F	GO:0003735|structural constituent of ribosome(ISS)	structural molecule activity	C	GO:0005840|ribosome(ISS)	ribosome	P	GO:0000394|RNA splicing, via endonucleolytic cleavage and ligation(RCA)	other cellular processes
ATMG01370	P	GO:0008150|biological_process(ND)	unknown biological processes	C	GO:0005739|mitochondrion(ISM)	mitochondria	F	GO:0003674|molecular_function(ND)	unknown molecular functions
AT5G61990	C	GO:0005739|mitochondrion(ISM)	mitochondria	P	GO:0008150|biological_process(ND)	unknown biological processes	F	GO:0003674|molecular_function(ND)	unknown molecular functions
AT2G18520	P	GO:0008150|biological_process(ND)	unknown biological processes	C	GO:0016020|membrane(IDA)	other membranes	C	GO:0005739|mitochondrion(ISM)	mitochondria
AT2G18390	F	GO:0005525|GTP binding(ISS)	other binding	F	GO:0003924|GTPase activity(ISS)	hydrolase activity	C	GO:0005794|Golgi apparatus(ISM)	Golgi apparatus	F	GO:0005525|GTP binding(ISS)	nucleotide binding	P	GO:0009630|gravitropism(NAS)	response to abiotic or biotic stimulus	P	GO:0009558|embryo sac cellularization(IMP)	developmental processes	P	GO:0000226|microtubule cytoskeleton organization(TAS)	other cellular processes	F	GO:0005525|GTP binding(ISS)	nucleotide binding	P	GO:0009793|embryo development ending in seed dormancy(IMP)	developmental processes	F	GO:0005525|GTP binding(ISS)	other binding	P	GO:0000226|microtubule cytoskeleton organization(TAS)	cell organization and biogenesis	P	GO:0009960|endosperm development(IMP)	developmental processes	P	GO:0007021|tubulin complex assembly(ISS)	cell organization and biogenesis
AT2G48030	F	GO:0016787|hydrolase activity(ISS)	hydrolase activity	C	GO:0005634|nucleus(ISM)	nucleus
AT3G23990	C	GO:0005829|cytosol(IDA)	cytosol	C	GO:0022626|cytosolic ribosome(IDA)	other cytoplasmic components	P	GO:0051131|chaperone-mediated protein complex assembly(TAS)	cell organization and biogenesis	C	GO:0005774|vacuolar membrane(IDA)	other intracellular components	C	GO:0005739|mitochondrion(IDA)	mitochondria	F	GO:0005524|ATP binding(IDA)	other binding	C	GO:0005739|mitochondrion(IDA)	mitochondria	C	GO:0005759|mitochondrial matrix(IDA)	mitochondria	P	GO:0009644|response to high light intensity(RCA)	response to abiotic or biotic stimulus	P	GO:0034976|response to endoplasmic reticulum stress(RCA)	other cellular processes	P	GO:0006626|protein targeting to mitochondrion(RCA)	other cellular processes	P	GO:0009408|response to heat(IEP)	response to abiotic or biotic stimulus	C	GO:0022626|cytosolic ribosome(IDA)	other intracellular components	P	GO:0007005|mitochondrion organization(TAS)	cell organization and biogenesis	P	GO:0007005|mitochondrion organization(TAS)	other cellular processes	C	GO:0005759|mitochondrial matrix(IDA)	other intracellular components	P
AT3G02490	F	GO:0003674|molecular_function(ND)	unknown molecular functions	C	GO:0005739|mitochondrion(ISM)	mitochondria	P	GO:0008150|biological_process(ND)	unknown biological processes
AT5G11310	C	GO:0005739|mitochondrion(ISM)	mitochondria	F	GO:0003674|molecular_function(ND)	unknown molecular functions
AT1G74400	C	GO:0005739|mitochondrion(ISM)	mitochondria	F	GO:0003674|molecular_function(ND)	unknown molecular functions	P	GO:0008150|biological_process(ND)	unknown biological processes
AT1G61870	C	GO:0005739|mitochondrion(IDA)	mitochondria	P	GO:0006333|chromatin assembly or disassembly(RCA)	other cellular processes	C	GO:0005739|mitochondrion(ISM)	mitochondria	C	GO:0016020|membrane(IDA)	other membranes	P	GO:0006333|chromatin assembly or disassembly(RCA)	cell organization and biogenesis
AT2G40720	C	GO:0005739|mitochondrion(ISM)	mitochondria
AT2G15630	C	GO:0005739|mitochondrion(ISM)	mitochondria	P	GO:0008150|biological_process(ND)	unknown biological processes	F	GO:0003674|molecular_function(ND)	unknown molecular functions	C	GO:0005739|mitochondrion(IDA)	mitochondria
AT2G22870	C	GO:0005737|cytoplasm(ISM)	other cytoplasmic components	P	GO:0009793|embryo development ending in seed dormancy(NAS)	developmental processes
AT1G64583	C	GO:0005739|mitochondrion(ISM)	mitochondria
AT4G35130	C	GO:0009507|chloroplast(ISM)	chloroplast	P	GO:0008150|biological_process(ND)	unknown biological processes
AT4G18840	F	GO:0003674|molecular_function(ND)	unknown molecular functions	C	GO:0005739|mitochondrion(ISM)	mitochondria	P	GO:0008150|biological_process(ND)	unknown biological processes
AT1G44740	C	GO:0005739|mitochondrion(ISM)	mitochondria	F	GO:0003674|molecular_function(ND)	unknown molecular functions	P	GO:0008150|biological_process(ND)	unknown biological processes
AT4G28010	F	GO:0003674|molecular_function(ND)	unknown molecular functions	P	GO:0008150|biological_process(ND)	unknown biological processes	C	GO:0005739|mitochondrion(ISM)	mitochondria	P	GO:0048451|petal formation(RCA)	developmental processes	P	GO:0048453|sepal formation(RCA)	developmental processes
AT3G15090	C	GO:0005739|mitochondrion(ISM)	mitochondria	F	GO:0008270|zinc ion binding(ISS)	other binding
AT5G62370	P	GO:0008150|biological_process(ND)	unknown biological processes	C	GO:0005739|mitochondrion(ISM)	mitochondria
AT5G09590	C	GO:0005774|vacuolar membrane(IDA)	other intracellular components	P	GO:0006457|protein folding(TAS)	other metabolic processes	P	GO:0009408|response to heat(RCA)	response to stress	C	GO:0005739|mitochondrion(IDA)	mitochondria	P	GO:0046686|response to cadmium ion(IEP)	other biological processes	F	GO:0005524|ATP binding(IDA)	other binding	P	GO:0009408|response to heat(IEP)	response to abiotic or biotic stimulus	P	GO:0019243|methylglyoxal catabolic process to D-lactate(RCA)	other cellular processes	P	GO:0006457|protein folding(TAS)	protein metabolism	P	GO:0009651|response to salt stress(IEP)	response to stress	P	GO:0009615|response to virus(IEP)	response to abiotic or biotic stimulus	P	GO:0006457|protein folding(RCA)	other metabolic processes	C	GO:0005739|mitochondrion(IDA)	mitochondria	P	GO:0009408|response to heat(RCA)	response to abiotic or biotic stimulus	P	GO:0019243|methylglyoxal catabolic process to D-lactate(RCA)	other metabolic processes	C	GO:0005759|mitochondrial matrix(TAS)	other cytoplasmic components	C
AT5G42450	P	GO:0008150|biological_process(ND)	unknown biological processes	C	GO:0005739|mitochondrion(ISM)	mitochondria
AT2G35120	C	GO:0005739|mitochondrion(IDA)	mitochondria	F	GO:0005524|ATP binding(IDA)	other binding	P	GO:0006546|glycine catabolic process(ISS)	other cellular processes	P	GO:0006546|glycine catabolic process(ISS)	other metabolic processes	F	GO:0005524|ATP binding(IDA)	nucleotide binding	P	GO:0009749|response to glucose(RCA)	other biological processes	C	GO:0005739|mitochondrion(IDA)	mitochondria	C	GO:0005960|glycine cleavage complex(ISS)	other cytoplasmic components	C	GO:0005739|mitochondrion(IDA)	mitochondria	C	GO:0005960|glycine cleavage complex(ISS)	other intracellular components	F	GO:0004375|glycine dehydrogenase (decarboxylating) activity(ISS)	other enzyme activity	C	GO:0005739|mitochondrion(IDA)	mitochondria	C	GO:0005739|mitochondrion(ISM)	mitochondria	P	GO:0009750|response to fructose(RCA)	other biological processes	P	GO:0009744|response to sucrose(RCA)	other biological processes
AT3G17240	C	GO:0005739|mitochondrion(IDA)	mitochondria	C	GO:0005739|mitochondrion(IDA)	mitochondria	P	GO:0006096|glycolytic process(RCA)	electron transport or energy pathways	C	GO:0005739|mitochondrion(ISM)	mitochondria	C	GO:0005759|mitochondrial matrix(ISS)	mitochondria	C	GO:0009507|chloroplast(IDA)	chloroplast	C	GO:0005739|mitochondrion(IDA)	mitochondria	C	GO:0009507|chloroplast(IDA)	chloroplast	C	GO:0005739|mitochondrion(IDA)	mitochondria	C	GO:0005739|mitochondrion(IDA)	mitochondria	C	GO:0005759|mitochondrial matrix(ISS)	other cytoplasmic components	C	GO:0048046|apoplast(IDA)	extracellular	C	GO:0005739|mitochondrion(IDA)	mitochondria	F	GO:0005524|ATP binding(IDA)	nucleotide binding	C	GO:0005739|mitochondrion(IDA)	mitochondria	F	GO:0004148|dihydrolipoyl dehydrogenase activity(IMP)	other enzyme activity	C
AT5G04780	C	GO:0005739|mitochondrion(ISM)	mitochondria	C	GO:0009507|chloroplast(IDA)	chloroplast	P	GO:0008150|biological_process(ND)	unknown biological processes
AT5G46025	F	GO:0005525|GTP binding(ISS)	other binding	C	GO:0005739|mitochondrion(ISM)	mitochondria	F	GO:0005525|GTP binding(ISS)	nucleotide binding
AT1G69620	C	GO:0005737|cytoplasm(ISM)	other cytoplasmic components	P	GO:0042254|ribosome biogenesis(ISS)	other biological processes	P	GO:0006412|translation(TAS)	protein metabolism	P	GO:0006412|translation(TAS)	other cellular processes	C	GO:0022625|cytosolic large ribosomal subunit(IDA)	ribosome	C	GO:0005840|ribosome(ISS)	ribosome	C	GO:0015934|large ribosomal subunit(TAS)	other cytoplasmic components	F	GO:0003735|structural constituent of ribosome(ISS)	structural molecule activity	C	GO:0015934|large ribosomal subunit(TAS)	other intracellular components	C	GO:0022625|cytosolic large ribosomal subunit(IDA)	other intracellular components	C	GO:0005774|vacuolar membrane(IDA)	other membranes	C	GO:0022625|cytosolic large ribosomal subunit(IDA)	other cytoplasmic components	C	GO:0005774|vacuolar membrane(IDA)	other cytoplasmic components	P	GO:0006412|translation(ISS)	other metabolic processes	C	GO:0015934|large ribosomal subunit(TAS)	ribosome	C	GO:0016020|membrane(IDA)	other membranes	P
AT1G15480	P	GO:0006302|double-strand break repair(RCA)	DNA or RNA metabolism	P	GO:0007129|synapsis(RCA)	other cellular processes	P	GO:0006302|double-strand break repair(RCA)	other cellular processes	P	GO:0045132|meiotic chromosome segregation(RCA)	cell organization and biogenesis	C	GO:0005739|mitochondrion(ISM)	mitochondria	P	GO:0006302|double-strand break repair(RCA)	other metabolic processes	P	GO:0009560|embryo sac egg cell differentiation(RCA)	developmental processes	P	GO:0008150|biological_process(ND)	unknown biological processes	P	GO:0045132|meiotic chromosome segregation(RCA)	other cellular processes	P	GO:0007131|reciprocal meiotic recombination(RCA)	other metabolic processes	P	GO:0007062|sister chromatid cohesion(RCA)	cell organization and biogenesis	P	GO:0006312|mitotic recombination(RCA)	DNA or RNA metabolism	P	GO:0007129|synapsis(RCA)	cell organization and biogenesis	F	GO:0003677|DNA binding(ISS)	DNA or RNA binding	P	GO:0006302|double-strand break repair(RCA)	response to stress	P	GO:0007062|sister chromatid cohesion(RCA)	other cellular processes	P
AT3G16610	F	GO:0003674|molecular_function(ND)	unknown molecular functions	P	GO:0006302|double-strand break repair(RCA)	DNA or RNA metabolism	P	GO:0006302|double-strand break repair(RCA)	other metabolic processes	P	GO:0007131|reciprocal meiotic recombination(RCA)	DNA or RNA metabolism	P	GO:0045132|meiotic chromosome segregation(RCA)	cell organization and biogenesis	P	GO:0042138|meiotic DNA double-strand break formation(RCA)	cell organization and biogenesis	P	GO:0007129|synapsis(RCA)	other cellular processes	C	GO:0005739|mitochondrion(ISM)	mitochondria	P	GO:0007062|sister chromatid cohesion(RCA)	cell organization and biogenesis	P	GO:0007131|reciprocal meiotic recombination(RCA)	other metabolic processes	P	GO:0007131|reciprocal meiotic recombination(RCA)	cell organization and biogenesis	P	GO:0006312|mitotic recombination(RCA)	DNA or RNA metabolism	P	GO:0007131|reciprocal meiotic recombination(RCA)	other cellular processes	P	GO:0007129|synapsis(RCA)	cell organization and biogenesis	P	GO:0006302|double-strand break repair(RCA)	response to stress	P	GO:0042138|meiotic DNA double-strand break formation(RCA)	other cellular processes	P
AT4G39660	C	GO:0005739|mitochondrion(ISM)	mitochondria	P	GO:0019544|arginine catabolic process to glutamate(IDA)	other cellular processes	P	GO:0046686|response to cadmium ion(IEP)	other biological processes	F	GO:0008270|zinc ion binding(IDA)	other binding	C	GO:0005739|mitochondrion(IDA)	mitochondria	C	GO:0005739|mitochondrion(IDA)	mitochondria	C	GO:0016020|membrane(IDA)	other membranes	C	GO:0005739|mitochondrion(IDA)	mitochondria	C	GO:0005774|vacuolar membrane(IDA)	other cytoplasmic components	P	GO:0019544|arginine catabolic process to glutamate(IDA)	other metabolic processes	F	GO:0008453|alanine-glyoxylate transaminase activity(ISS)	transferase activity	C	GO:0005774|vacuolar membrane(IDA)	other membranes	C	GO:0005774|vacuolar membrane(IDA)	other intracellular components	F	GO:0008453|alanine-glyoxylate transaminase activity(IDA)	transferase activity
AT5G61230	P	GO:0009567|double fertilization forming a zygote and endosperm(IMP)	other biological processes	C	GO:0005634|nucleus(ISM)	nucleus	P	GO:0009553|embryo sac development(IMP)	developmental processes	P	GO:0080173|male-female gamete recognition during double fertilization(IMP)	other cellular processes	C	GO:0005739|mitochondrion(IDA)	mitochondria	C	GO:0005634|nucleus(IDA)	nucleus
AT5G47460	F	GO:0003674|molecular_function(ND)	unknown molecular functions	C	GO:0005739|mitochondrion(ISM)	mitochondria	P	GO:0008150|biological_process(ND)	unknown biological processes
AT1G13810	C	GO:0005575|cellular_component(ND)	unknown cellular components
AT5G14350	C	GO:0005739|mitochondrion(ISM)	mitochondria	P	GO:0008150|biological_process(ND)	unknown biological processes	F	GO:0003674|molecular_function(ND)	unknown molecular functions
AT4G02820	P	GO:0009560|embryo sac egg cell differentiation(RCA)	other cellular processes	F	GO:0003674|molecular_function(ND)	unknown molecular functions	P	GO:0008150|biological_process(ND)	unknown biological processes	P	GO:0006606|protein import into nucleus(RCA)	transport	C	GO:0005739|mitochondrion(IDA)	mitochondria	C	GO:0005739|mitochondrion(ISM)	mitochondria	P	GO:0009560|embryo sac egg cell differentiation(RCA)	developmental processes
AT5G39900	F	GO:0003746|translation elongation factor activity(ISS)	DNA or RNA binding	F	GO:0005525|GTP binding(ISS)	nucleotide binding	C	GO:0005886|plasma membrane(ISM)	plasma membrane	F	GO:0005525|GTP binding(ISS)	other binding
AT3G13860	C	GO:0005739|mitochondrion(IDA)	mitochondria	C	GO:0005739|mitochondrion(IDA)	mitochondria	P	GO:0046686|response to cadmium ion(IEP)	other biological processes	C	GO:0005774|vacuolar membrane(IDA)	other cytoplasmic components	C	GO:0005774|vacuolar membrane(IDA)	other membranes	C	GO:0005739|mitochondrion(IDA)	mitochondria	C	GO:0005739|mitochondrion(ISM)	mitochondria	C	GO:0005739|mitochondrion(IDA)	mitochondria	C	GO:0005774|vacuolar membrane(IDA)	other intracellular components
AT4G19890	C	GO:0005739|mitochondrion(ISM)	mitochondria
AT5G61370	F	GO:0003674|molecular_function(ND)	unknown molecular functions	C	GO:0005739|mitochondrion(ISM)	mitochondria	P	GO:0008150|biological_process(ND)	unknown biological processes	C	GO:0005739|mitochondrion(IDA)	mitochondria
AT2G20710	P	GO:0009560|embryo sac egg cell differentiation(RCA)	developmental processes	P	GO:0009560|embryo sac egg cell differentiation(RCA)	other cellular processes	P	GO:0008150|biological_process(ND)	unknown biological processes	C	GO:0005739|mitochondrion(ISM)	mitochondria	C	GO:0005739|mitochondrion(ISM)	mitochondria
AT1G26880	P	GO:0001510|RNA methylation(RCA)	other cellular processes	P	GO:0006412|translation(ISS)	protein metabolism	P	GO:0006412|translation(ISS)	other metabolic processes	C	GO:0005730|nucleolus(IDA)	nucleus	C	GO:0005730|nucleolus(IDA)	other intracellular components	C	GO:0005737|cytoplasm(ISM)	other cytoplasmic components	C	GO:0005737|cytoplasm(ISM)	other cytoplasmic components	C	GO:0005840|ribosome(ISS)	ribosome	C	GO:0009507|chloroplast(IDA)	chloroplast	P	GO:0006412|translation(ISS)	other cellular processes	P	GO:0001510|RNA methylation(RCA)	other metabolic processes	P	GO:0042254|ribosome biogenesis(ISS)	other biological processes	F	GO:0003735|structural constituent of ribosome(ISS)	structural molecule activity
AT5G56940	C	GO:0009536|plastid(IDA)	plastid	P	GO:0042254|ribosome biogenesis(ISS)	other biological processes	P	GO:0006412|translation(ISS)	protein metabolism	F	GO:0003735|structural constituent of ribosome(ISS)	structural molecule activity	C	GO:0005739|mitochondrion(IDA)	mitochondria	P	GO:0035196|production of miRNAs involved in gene silencing by miRNA(RCA)	other metabolic processes	P	GO:0035196|production of miRNAs involved in gene silencing by miRNA(RCA)	other cellular processes	C	GO:0005739|mitochondrion(ISM)	mitochondria	C	GO:0005840|ribosome(ISS)	ribosome	P	GO:0010267|production of ta-siRNAs involved in RNA interference(RCA)	other cellular processes	P	GO:0006412|translation(ISS)	other cellular processes	P	GO:0051607|defense response to virus(RCA)	response to abiotic or biotic stimulus	P	GO:0006412|translation(ISS)	other metabolic processes	P	GO:0051607|defense response to virus(RCA)	response to stress	P	GO:0010267|production of ta-siRNAs involved in RNA interference(RCA)	other metabolic processes
AT5G64650	P	GO:0006354|DNA-templated transcription, elongation(RCA)	transcription,DNA-dependent	P	GO:0006354|DNA-templated transcription, elongation(RCA)	other metabolic processes	C	GO:0005840|ribosome(ISS)	ribosome	C	GO:0009507|chloroplast(ISM)	chloroplast	P	GO:0006354|DNA-templated transcription, elongation(RCA)	other cellular processes
AT4G37910	C	GO:0005759|mitochondrial matrix(TAS)	other intracellular components	P	GO:0006457|protein folding(TAS)	other cellular processes	C	GO:0005739|mitochondrion(IDA)	mitochondria	P	GO:0019243|methylglyoxal catabolic process to D-lactate(RCA)	other cellular processes	C	GO:0005739|mitochondrion(IDA)	mitochondria	C	GO:0005759|mitochondrial matrix(TAS)	mitochondria	P	GO:0006457|protein folding(TAS)	other metabolic processes	P	GO:0006096|glycolytic process(RCA)	other cellular processes	P	GO:0046686|response to cadmium ion(RCA)	other biological processes	P	GO:0046686|response to cadmium ion(IEP)	other biological processes	F	GO:0005524|ATP binding(IDA)	nucleotide binding	C	GO:0005774|vacuolar membrane(IDA)	other intracellular components	C	GO:0005739|mitochondrion(ISM)	mitochondria	F	GO:0008270|zinc ion binding(IDA)	other binding	F	GO:0005524|ATP binding(IDA)	other binding	P	GO:0006094|gluconeogenesis(RCA)	other metabolic processes	C
AT5G47030	C	GO:0005739|mitochondrion(IDA)	mitochondria	P	GO:0006096|glycolytic process(RCA)	other metabolic processes	P	GO:0009853|photorespiration(RCA)	other metabolic processes	C	GO:0000275|mitochondrial proton-transporting ATP synthase complex, catalytic core F(1)(IDA)	other membranes	P	GO:0080129|proteasome core complex assembly(RCA)	cell organization and biogenesis	P	GO:0009266|response to temperature stimulus(RCA)	response to abiotic or biotic stimulus	C	GO:0005753|mitochondrial proton-transporting ATP synthase complex(IDA)	mitochondria	C	GO:0005739|mitochondrion(IDA)	mitochondria	P	GO:0046686|response to cadmium ion(RCA)	other biological processes	P	GO:0009651|response to salt stress(IEP)	response to abiotic or biotic stimulus	C	GO:0005753|mitochondrial proton-transporting ATP synthase complex(ISS)	other cytoplasmic components	P	GO:0006096|glycolytic process(RCA)	other cellular processes	P	GO:0006098|pentose-phosphate shunt(RCA)	other cellular processes	P	GO:0006972|hyperosmotic response(RCA)	response to abiotic or biotic stimulus	C	GO:0005739|mitochondrion(IDA)	mitochondria	P	GO:0009060|aerobic respiration(RCA)	other metabolic processes	P
AT1G16740	P	GO:0006412|translation(ISS)	other metabolic processes	F	GO:0003735|structural constituent of ribosome(ISS)	structural molecule activity	P	GO:0006412|translation(ISS)	protein metabolism	C	GO:0005840|ribosome(ISS)	ribosome	P	GO:0006412|translation(ISS)	other cellular processes	C	GO:0009507|chloroplast(ISM)	chloroplast	P	GO:0042254|ribosome biogenesis(ISS)	other biological processes
AT5G61800	C	GO:0005739|mitochondrion(ISM)	mitochondria	F	GO:0003674|molecular_function(ND)	unknown molecular functions	P	GO:0008150|biological_process(ND)	unknown biological processes
AT2G01740	C	GO:0005739|mitochondrion(ISM)	mitochondria	F	GO:0003674|molecular_function(ND)	unknown molecular functions	P	GO:0008150|biological_process(ND)	unknown biological processes
AT1G62260	C	GO:0005739|mitochondrion(ISM)	mitochondria	P	GO:0016554|cytidine to uridine editing(IMP)	other cellular processes	P	GO:0016554|cytidine to uridine editing(IMP)	other metabolic processes	F	GO:0003674|molecular_function(ND)	unknown molecular functions
AT2G13600	P	GO:0010182|sugar mediated signaling pathway(IMP)	other cellular processes	C	GO:0005739|mitochondrion(ISM)	mitochondria	F	GO:0003674|molecular_function(ND)	unknown molecular functions	C	GO:0005739|mitochondrion(IDA)	mitochondria	P	GO:0010182|sugar mediated signaling pathway(IMP)	signal transduction	P	GO:0080156|mitochondrial mRNA modification(IMP)	other cellular processes	P	GO:0080156|mitochondrial mRNA modification(IMP)	other metabolic processes
AT3G49080	P	GO:0009220|pyrimidine ribonucleotide biosynthetic process(RCA)	other metabolic processes	P	GO:0006354|DNA-templated transcription, elongation(RCA)	other cellular processes	C	GO:0022627|cytosolic small ribosomal subunit(ISS)	other intracellular components	P	GO:0009220|pyrimidine ribonucleotide biosynthetic process(RCA)	other cellular processes	P	GO:0006354|DNA-templated transcription, elongation(RCA)	other metabolic processes	P	GO:0006412|translation(ISS)	other cellular processes	P	GO:0006412|translation(ISS)	other metabolic processes	C	GO:0022627|cytosolic small ribosomal subunit(ISS)	ribosome	C	GO:0005739|mitochondrion(ISM)	mitochondria	F	GO:0003735|structural constituent of ribosome(ISS)	structural molecule activity	C	GO:0022627|cytosolic small ribosomal subunit(ISS)	other cytoplasmic components	C	GO:0022627|cytosolic small ribosomal subunit(ISS)	cytosol	P	GO:0006412|translation(ISS)	protein metabolism	P	GO:0006354|DNA-templated transcription, elongation(RCA)	transcription,DNA-dependent
AT5G03560	C	GO:0009507|chloroplast(ISM)	chloroplast	F	GO:0015391|nucleobase:cation symporter activity(ISS)	transporter activity	C	GO:0009507|chloroplast(ISM)	chloroplast
AT2G33210	C	GO:0009570|chloroplast stroma(IDA)	other intracellular components	C	GO:0005739|mitochondrion(IDA)	mitochondria	F	GO:0005507|copper ion binding(IDA)	other binding	P	GO:0010498|proteasomal protein catabolic process(RCA)	protein metabolism	C	GO:0005886|plasma membrane(IDA)	plasma membrane	C	GO:0005739|mitochondrion(IDA)	mitochondria	P	GO:0010498|proteasomal protein catabolic process(RCA)	other metabolic processes	P	GO:0009220|pyrimidine ribonucleotide biosynthetic process(RCA)	other cellular processes	P	GO:0007010|cytoskeleton organization(RCA)	other cellular processes	C	GO:0005739|mitochondrion(IDA)	mitochondria	C	GO:0005774|vacuolar membrane(IDA)	other membranes	C	GO:0009570|chloroplast stroma(IDA)	chloroplast	C	GO:0009570|chloroplast stroma(IDA)	plastid	C	GO:0009941|chloroplast envelope(IDA)	other intracellular components	C	GO:0009941|chloroplast envelope(IDA)	plastid	C	GO:0005739|mitochondrion(IDA)	mitochondria	P
AT1G13800	F	GO:0003674|molecular_function(ND)	unknown molecular functions	C	GO:0005739|mitochondrion(ISM)	mitochondria
AT2G39230	C	GO:0005739|mitochondrion(ISM)	mitochondria	P	GO:0008150|biological_process(ND)	unknown biological processes
AT3G28900	P	GO:0001510|RNA methylation(RCA)	other cellular processes	P	GO:0006412|translation(ISS)	other metabolic processes	C	GO:0022626|cytosolic ribosome(IDA)	cytosol	C	GO:0005840|ribosome(ISS)	ribosome	C	GO:0022626|cytosolic ribosome(IDA)	other intracellular components	P	GO:0001510|RNA methylation(RCA)	other metabolic processes	P	GO:0042254|ribosome biogenesis(ISS)	other biological processes	C	GO:0022626|cytosolic ribosome(IDA)	other cytoplasmic components	P	GO:0006412|translation(ISS)	other cellular processes	F	GO:0003735|structural constituent of ribosome(ISS)	structural molecule activity	C	GO:0022625|cytosolic large ribosomal subunit(IDA)	ribosome	P	GO:0006412|translation(ISS)	protein metabolism	C	GO:0005737|cytoplasm(ISM)	other cytoplasmic components	C	GO:0022625|cytosolic large ribosomal subunit(IDA)	other cytoplasmic components	C	GO:0022625|cytosolic large ribosomal subunit(IDA)	cytosol	C	GO:0022625|cytosolic large ribosomal subunit(IDA)	other intracellular components	C
AT5G41650	P	GO:0008152|metabolic process(ISS)	other metabolic processes	C	GO:0005575|cellular_component(ND)	unknown cellular components	F	GO:0003824|catalytic activity(ISS)	other enzyme activity
AT4G38010	P	GO:0008150|biological_process(ND)	unknown biological processes	F	GO:0003674|molecular_function(ND)	unknown molecular functions	C	GO:0005739|mitochondrion(ISM)	mitochondria
AT4G21880	C	GO:0005739|mitochondrion(ISM)	mitochondria	F	GO:0003674|molecular_function(ND)	unknown molecular functions	P	GO:0008150|biological_process(ND)	unknown biological processes
AT3G05810	C	GO:0009507|chloroplast(ISM)	chloroplast	P	GO:0008150|biological_process(ND)	unknown biological processes	P	GO:0006333|chromatin assembly or disassembly(RCA)	other cellular processes	P	GO:0006333|chromatin assembly or disassembly(RCA)	cell organization and biogenesis	F	GO:0003674|molecular_function(ND)	unknown molecular functions
AT1G71730	P	GO:0008150|biological_process(ND)	unknown biological processes	F	GO:0003674|molecular_function(ND)	unknown molecular functions	C	GO:0009507|chloroplast(ISM)	chloroplast
AT1G64185	F	GO:0003824|catalytic activity(ISS)	other enzyme activity	P	GO:0008152|metabolic process(ISS)	other metabolic processes	C	GO:0005575|cellular_component(ND)	unknown cellular components
AT4G39952	P	GO:0008150|biological_process(ND)	unknown biological processes	C	GO:0005739|mitochondrion(ISM)	mitochondria
AT2G27730	C	GO:0005747|mitochondrial respiratory chain complex I(IDA)	mitochondria	C	GO:0005747|mitochondrial respiratory chain complex I(IDA)	other cytoplasmic components	C	GO:0005747|mitochondrial respiratory chain complex I(IDA)	mitochondria	C	GO:0005747|mitochondrial respiratory chain complex I(IDA)	other intracellular components	P	GO:0009853|photorespiration(RCA)	other metabolic processes	C	GO:0005739|mitochondrion(IDA)	mitochondria	P	GO:0080129|proteasome core complex assembly(RCA)	cell organization and biogenesis	C	GO:0005747|mitochondrial respiratory chain complex I(IDA)	other membranes	C	GO:0005747|mitochondrial respiratory chain complex I(IDA)	other cytoplasmic components	C	GO:0005730|nucleolus(IDA)	nucleus	P	GO:0006511|ubiquitin-dependent protein catabolic process(RCA)	protein metabolism	C	GO:0005773|vacuole(IDA)	other intracellular components	C	GO:0031966|mitochondrial membrane(IDA)	other intracellular components	C	GO:0031966|mitochondrial membrane(IDA)	mitochondria	F	GO:0005507|copper ion binding(IDA)	other binding	C	GO:0005739|mitochondrion(IDA)	mitochondria	C
AT5G15980	C	GO:0005739|mitochondrion(ISM)	mitochondria	F	GO:0003674|molecular_function(ND)	unknown molecular functions	P	GO:0008150|biological_process(ND)	unknown biological processes
AT1G12300	P	GO:0008150|biological_process(ND)	unknown biological processes	C	GO:0005739|mitochondrion(ISM)	mitochondria
AT3G13160	P	GO:0034968|histone lysine methylation(RCA)	protein metabolism	C	GO:0005739|mitochondrion(ISM)	mitochondria	C	GO:0005739|mitochondrion(IDA)	mitochondria	C	GO:0005739|mitochondrion(IDA)	mitochondria	P	GO:0008150|biological_process(ND)	unknown biological processes	C	GO:0016020|membrane(IDA)	other membranes	P	GO:0034968|histone lysine methylation(RCA)	cell organization and biogenesis	P	GO:0034968|histone lysine methylation(RCA)	other metabolic processes	P	GO:0009220|pyrimidine ribonucleotide biosynthetic process(RCA)	other metabolic processes	P	GO:0009909|regulation of flower development(RCA)	developmental processes	P	GO:0009220|pyrimidine ribonucleotide biosynthetic process(RCA)	other cellular processes	P	GO:0034968|histone lysine methylation(RCA)	other cellular processes
AT3G51790	C	GO:0005743|mitochondrial inner membrane(IDA)	other cytoplasmic components	P	GO:0018063|cytochrome c-heme linkage(IGI)	cell organization and biogenesis	C	GO:0005743|mitochondrial inner membrane(IDA)	mitochondria	C	GO:0005739|mitochondrion(ISM)	mitochondria	P	GO:0018063|cytochrome c-heme linkage(IGI)	protein metabolism	C	GO:0005743|mitochondrial inner membrane(IDA)	other membranes	F	GO:0020037|heme binding(IDA)	other binding	P	GO:0017004|cytochrome complex assembly(ISS)	cell organization and biogenesis	P	GO:0019243|methylglyoxal catabolic process to D-lactate(RCA)	other metabolic processes	P	GO:0019243|methylglyoxal catabolic process to D-lactate(RCA)	other cellular processes	P	GO:0018063|cytochrome c-heme linkage(IGI)	other cellular processes	P	GO:0006626|protein targeting to mitochondrion(RCA)	cell organization and biogenesis	P	GO:0006626|protein targeting to mitochondrion(RCA)	other cellular processes	C	GO:0005743|mitochondrial inner membrane(IDA)	other intracellular components	P	GO:0018063|cytochrome c-heme linkage(IGI)	other metabolic processes	P	GO:0006626|protein targeting to mitochondrion(RCA)	transport
AT4G02930	P	GO:0009220|pyrimidine ribonucleotide biosynthetic process(RCA)	other metabolic processes	F	GO:0050897|cobalt ion binding(IDA)	other binding	C	GO:0005739|mitochondrion(IDA)	mitochondria	C	GO:0005739|mitochondrion(IDA)	mitochondria	F	GO:0005524|ATP binding(IDA)	other binding	C	GO:0005739|mitochondrion(ISM)	mitochondria	C	GO:0005739|mitochondrion(IDA)	mitochondria	P	GO:0009220|pyrimidine ribonucleotide biosynthetic process(RCA)	other cellular processes	F	GO:0008270|zinc ion binding(IDA)	other binding	C	GO:0005618|cell wall(IDA)	cell wall	F	GO:0003746|translation elongation factor activity(ISS)	DNA or RNA binding	F	GO:0005524|ATP binding(IDA)	nucleotide binding	C	GO:0005739|mitochondrion(IDA)	mitochondria	P	GO:0046686|response to cadmium ion(IEP)	other biological processes
AT3G22690	P	GO:0009451|RNA modification(IMP)	other cellular processes	C	GO:0009507|chloroplast(ISM)	chloroplast	C	GO:0009507|chloroplast(ISM)	chloroplast	P	GO:0010027|thylakoid membrane organization(IMP)	cell organization and biogenesis	P	GO:0010027|thylakoid membrane organization(IMP)	other cellular processes	P	GO:0009451|RNA modification(IMP)	other metabolic processes	C	GO:0009507|chloroplast(IDA)	chloroplast	P	GO:0010207|photosystem II assembly(IDA)	cell organization and biogenesis	P	GO:0010207|photosystem II assembly(IDA)	electron transport or energy pathways	P	GO:0010207|photosystem II assembly(IDA)	other cellular processes	P	GO:0048564|photosystem I assembly(IDA)	other metabolic processes	P	GO:0048564|photosystem I assembly(IDA)	other cellular processes	P	GO:0010207|photosystem II assembly(IDA)	other metabolic processes	P	GO:0048564|photosystem I assembly(IDA)	electron transport or energy pathways	P	GO:0010380|regulation of chlorophyll biosynthetic process(IEP)	other cellular processes	P	GO:0048564|photosystem I assembly(IDA)	cell organization and biogenesis	P
AT1G64580	P	GO:0008150|biological_process(ND)	unknown biological processes	C	GO:0005739|mitochondrion(ISM)	mitochondria
AT3G25970	P	GO:0008150|biological_process(ND)	unknown biological processes	C	GO:0005739|mitochondrion(ISM)	mitochondria
AT5G66500	C	GO:0005739|mitochondrion(ISM)	mitochondria	F	GO:0003674|molecular_function(ND)	unknown molecular functions	P	GO:0008150|biological_process(ND)	unknown biological processes
AT2G26790	C	GO:0005739|mitochondrion(ISM)	mitochondria	P	GO:0008150|biological_process(ND)	unknown biological processes
AT3G60960	P	GO:0008150|biological_process(ND)	unknown biological processes	C	GO:0005739|mitochondrion(ISM)	mitochondria	C	GO:0005739|mitochondrion(IDA)	mitochondria
AT1G19290	C	GO:0005739|mitochondrion(ISM)	mitochondria
AT2G47485	C	GO:0005739|mitochondrion(ISM)	mitochondria
AT5G27460	C	GO:0005739|mitochondrion(ISM)	mitochondria	P	GO:0008150|biological_process(ND)	unknown biological processes	F	GO:0003674|molecular_function(ND)	unknown molecular functions
AT1G80880	C	GO:0005739|mitochondrion(ISM)	mitochondria	P	GO:0008150|biological_process(ND)	unknown biological processes
AT3G14730	F	GO:0003674|molecular_function(ND)	unknown molecular functions	P	GO:0008150|biological_process(ND)	unknown biological processes	C	GO:0005739|mitochondrion(ISM)	mitochondria
AT3G52580	F	GO:0003735|structural constituent of ribosome(ISS)	structural molecule activity	C	GO:0022627|cytosolic small ribosomal subunit(ISS)	other cytoplasmic components	P	GO:0006412|translation(ISS)	protein metabolism	P	GO:0009664|plant-type cell wall organization(RCA)	other cellular processes	P	GO:0042545|cell wall modification(RCA)	cell organization and biogenesis	P	GO:0006412|translation(ISS)	other metabolic processes	P	GO:0006412|translation(ISS)	other cellular processes	C	GO:0022627|cytosolic small ribosomal subunit(ISS)	cytosol	C	GO:0022627|cytosolic small ribosomal subunit(ISS)	other intracellular components	P	GO:0009664|plant-type cell wall organization(RCA)	cell organization and biogenesis	P	GO:0001510|RNA methylation(RCA)	other cellular processes	P	GO:0001510|RNA methylation(RCA)	other metabolic processes	C	GO:0005737|cytoplasm(ISM)	other cytoplasmic components	C	GO:0022627|cytosolic small ribosomal subunit(ISS)	ribosome	P	GO:0042545|cell wall modification(RCA)	other cellular processes
AT4G09320	C	GO:0005773|vacuole(IDA)	other intracellular components	C	GO:0005774|vacuolar membrane(IDA)	other cytoplasmic components	C	GO:0005774|vacuolar membrane(IDA)	other membranes	C	GO:0005777|peroxisome(IDA)	other intracellular components	F	GO:0004550|nucleoside diphosphate kinase activity(ISS)	kinase activity	P	GO:0009651|response to salt stress(IEP)	response to abiotic or biotic stimulus	C	GO:0005774|vacuolar membrane(IDA)	other intracellular components	F	GO:0004550|nucleoside diphosphate kinase activity(ISS)	transferase activity	C	GO:0009506|plasmodesma(IDA)	other cellular components	C	GO:0005737|cytoplasm(ISM)	other cytoplasmic components	F	GO:0005524|ATP binding(ISS)	nucleotide binding	F	GO:0005524|ATP binding(ISS)	other binding	P	GO:0046686|response to cadmium ion(IEP)	other biological processes	C	GO:0009507|chloroplast(IDA)	chloroplast	C	GO:0005773|vacuole(IDA)	other cytoplasmic components	P	GO:0009651|response to salt stress(IEP)	response to stress	C
AT5G03290	P	GO:0043161|proteasome-mediated ubiquitin-dependent protein catabolic process(RCA)	other metabolic processes	C	GO:0005739|mitochondrion(IDA)	mitochondria	P	GO:0043161|proteasome-mediated ubiquitin-dependent protein catabolic process(RCA)	other cellular processes	C	GO:0005739|mitochondrion(ISM)	mitochondria	F	GO:0004449|isocitrate dehydrogenase (NAD+) activity(ISS)	other enzyme activity	F	GO:0005524|ATP binding(IDA)	nucleotide binding	P	GO:0051788|response to misfolded protein(RCA)	response to stress	P	GO:0006099|tricarboxylic acid cycle(TAS)	other cellular processes	P	GO:0006102|isocitrate metabolic process(IMP)	other cellular processes	F	GO:0008270|zinc ion binding(IDA)	other binding	P	GO:0008152|metabolic process(ISS)	other metabolic processes	P	GO:0009735|response to cytokinin(RCA)	other biological processes	P	GO:0006099|tricarboxylic acid cycle(TAS)	electron transport or energy pathways	C	GO:0005739|mitochondrion(IDA)	mitochondria	P	GO:0009744|response to sucrose(RCA)	other biological processes	P	GO:0009749|response to glucose(RCA)	other biological processes	P
AT2G30920	P	GO:0006744|ubiquinone biosynthetic process(IGI)	other metabolic processes	P	GO:0009793|embryo development ending in seed dormancy(NAS)	developmental processes	C	GO:0005739|mitochondrion(ISM)	mitochondria	F	GO:0010420|polyprenyldihydroxybenzoate methyltransferase activity(IGI)	transferase activity	P	GO:0009086|methionine biosynthetic process(RCA)	other cellular processes	P	GO:0019243|methylglyoxal catabolic process to D-lactate(RCA)	other cellular processes	P	GO:0006744|ubiquinone biosynthetic process(ISS)	other cellular processes	C	GO:0005740|mitochondrial envelope(IDA)	other cytoplasmic components	C	GO:0005740|mitochondrial envelope(IDA)	other intracellular components	P	GO:0000394|RNA splicing, via endonucleolytic cleavage and ligation(RCA)	other metabolic processes	P	GO:0009086|methionine biosynthetic process(RCA)	other metabolic processes	F	GO:0004395|hexaprenyldihydroxybenzoate methyltransferase activity(IGI)	transferase activity	P	GO:0006744|ubiquinone biosynthetic process(ISS)	other metabolic processes	P	GO:0006744|ubiquinone biosynthetic process(IGI)	other cellular processes	C	GO:0005740|mitochondrial envelope(IDA)	mitochondria	P	GO:0000394|RNA splicing, via endonucleolytic cleavage and ligation(RCA)	other cellular processes	P
AT2G29260	F	GO:0016491|oxidoreductase activity(ISS)	other enzyme activity
AT3G53360	P	GO:0008150|biological_process(ND)	unknown biological processes	C	GO:0005739|mitochondrion(ISM)	mitochondria	F	GO:0003674|molecular_function(ND)	unknown molecular functions
AT5G11870	C	GO:0005739|mitochondrion(ISM)	mitochondria	C	GO:0005739|mitochondrion(ISM)	mitochondria
AT3G16170	P	GO:0090410|malonate catabolic process(IMP)	other metabolic processes	P	GO:0090410|malonate catabolic process(IMP)	other cellular processes	C	GO:0016020|membrane(IDA)	other membranes	C	GO:0005634|nucleus(IDA)	nucleus	F	GO:0090409|malonyl-CoA synthetase activity(IDA)	other enzyme activity	C	GO:0005739|mitochondrion(ISM)	mitochondria	F	GO:0016208|AMP binding(ISS)	nucleotide binding	F	GO:0016208|AMP binding(ISS)	other binding	C	GO:0005829|cytosol(IDA)	cytosol
AT3G49240	P	GO:0009220|pyrimidine ribonucleotide biosynthetic process(RCA)	other cellular processes	P	GO:0016567|protein ubiquitination(RCA)	protein metabolism	P	GO:0009845|seed germination(RCA)	developmental processes	P	GO:0048825|cotyledon development(RCA)	developmental processes	P	GO:0051301|cell division(RCA)	other cellular processes	F	GO:0005524|ATP binding(IDA)	nucleotide binding	P	GO:0010564|regulation of cell cycle process(RCA)	other cellular processes	C	GO:0005739|mitochondrion(IDA)	mitochondria	P	GO:0050826|response to freezing(RCA)	response to abiotic or biotic stimulus	P	GO:0009793|embryo development ending in seed dormancy(IMP)	developmental processes	P	GO:0009560|embryo sac egg cell differentiation(RCA)	other cellular processes	P	GO:0009793|embryo development ending in seed dormancy(NAS)	developmental processes	P	GO:0048366|leaf development(RCA)	developmental processes	P	GO:0009220|pyrimidine ribonucleotide biosynthetic process(RCA)	other metabolic processes	P	GO:0010182|sugar mediated signaling pathway(RCA)	other cellular processes	P	GO:0009737|response to abscisic acid(RCA)	other biological processes	P
AT5G56310	F	GO:0003674|molecular_function(ND)	unknown molecular functions	C	GO:0005739|mitochondrion(ISM)	mitochondria	P	GO:0008150|biological_process(ND)	unknown biological processes
AT1G53530	C	GO:0005739|mitochondrion(ISM)	mitochondria	P	GO:0006508|proteolysis(ISS)	protein metabolism	C	GO:0005886|plasma membrane(ISM)	plasma membrane	F	GO:0008233|peptidase activity(ISS)	hydrolase activity	C	GO:0016020|membrane(ISS)	other membranes
AT4G35490	P	GO:0042254|ribosome biogenesis(ISS)	other biological processes	P	GO:0006354|DNA-templated transcription, elongation(RCA)	other metabolic processes	P	GO:0006354|DNA-templated transcription, elongation(RCA)	transcription,DNA-dependent	C	GO:0005840|ribosome(ISS)	ribosome	C	GO:0022625|cytosolic large ribosomal subunit(ISS)	other cytoplasmic components	C	GO:0022625|cytosolic large ribosomal subunit(ISS)	cytosol	C	GO:0022625|cytosolic large ribosomal subunit(ISS)	other intracellular components	C	GO:0005739|mitochondrion(ISM)	mitochondria	C	GO:0022625|cytosolic large ribosomal subunit(ISS)	ribosome	P	GO:0006354|DNA-templated transcription, elongation(RCA)	other cellular processes	P	GO:0006626|protein targeting to mitochondrion(RCA)	transport	P	GO:0006626|protein targeting to mitochondrion(RCA)	cell organization and biogenesis	P	GO:0006626|protein targeting to mitochondrion(RCA)	other cellular processes	F	GO:0003735|structural constituent of ribosome(ISS)	structural molecule activity
AT3G53940	C	GO:0005743|mitochondrial inner membrane(ISS)	other membranes	C	GO:0005743|mitochondrial inner membrane(ISS)	other intracellular components	P	GO:0009220|pyrimidine ribonucleotide biosynthetic process(RCA)	other cellular processes	C	GO:0005743|mitochondrial inner membrane(ISS)	other cytoplasmic components	P	GO:0006810|transport(ISS)	transport	C	GO:0005739|mitochondrion(ISM)	mitochondria	C	GO:0005743|mitochondrial inner membrane(ISS)	mitochondria	P	GO:0006839|mitochondrial transport(ISS)	transport	P	GO:0009220|pyrimidine ribonucleotide biosynthetic process(RCA)	other metabolic processes	F	GO:0005215|transporter activity(ISS)	transporter activity
AT1G52640	C	GO:0005739|mitochondrion(ISM)	mitochondria	P	GO:0008150|biological_process(ND)	unknown biological processes
AT3G07290	F	GO:0003674|molecular_function(ND)	unknown molecular functions	P	GO:0008150|biological_process(ND)	unknown biological processes	C	GO:0005739|mitochondrion(ISM)	mitochondria
AT4G19440	C	GO:0005739|mitochondrion(ISM)	mitochondria	C	GO:0005739|mitochondrion(ISM)	mitochondria	P	GO:0008150|biological_process(ND)	unknown biological processes
AT4G02610	F	GO:0033984|indole-3-glycerol-phosphate lyase activity(IDA)	other enzyme activity	P	GO:0000394|RNA splicing, via endonucleolytic cleavage and ligation(RCA)	other metabolic processes	P	GO:0006730|one-carbon metabolic process(RCA)	other cellular processes	C	GO:0009507|chloroplast(IDA)	chloroplast	P	GO:0000162|tryptophan biosynthetic process(TAS)	other metabolic processes	P	GO:0009086|methionine biosynthetic process(RCA)	other cellular processes	P	GO:0000162|tryptophan biosynthetic process(TAS)	other cellular processes	P	GO:0009086|methionine biosynthetic process(RCA)	other metabolic processes	C	GO:0005737|cytoplasm(IDA)	other cytoplasmic components	P	GO:0000394|RNA splicing, via endonucleolytic cleavage and ligation(RCA)	other cellular processes	F	GO:0004834|tryptophan synthase activity(IDA)	other enzyme activity	C	GO:0009507|chloroplast(ISM)	chloroplast	P	GO:0006730|one-carbon metabolic process(RCA)	other metabolic processes	F	GO:0004834|tryptophan synthase activity(IGI)	other enzyme activity
AT3G02650	F	GO:0003674|molecular_function(ND)	unknown molecular functions	P	GO:0010388|cullin deneddylation(RCA)	other metabolic processes	P	GO:0008150|biological_process(ND)	unknown biological processes	C	GO:0005739|mitochondrion(ISM)	mitochondria	P	GO:0009909|regulation of flower development(RCA)	developmental processes	P	GO:0009640|photomorphogenesis(RCA)	response to abiotic or biotic stimulus	P	GO:0009220|pyrimidine ribonucleotide biosynthetic process(RCA)	other metabolic processes	P	GO:0034968|histone lysine methylation(RCA)	protein metabolism	P	GO:0034968|histone lysine methylation(RCA)	cell organization and biogenesis	P	GO:0010388|cullin deneddylation(RCA)	protein metabolism	P	GO:0009640|photomorphogenesis(RCA)	developmental processes	P	GO:0009220|pyrimidine ribonucleotide biosynthetic process(RCA)	other cellular processes	P	GO:0034968|histone lysine methylation(RCA)	other metabolic processes	P	GO:0034968|histone lysine methylation(RCA)	other cellular processes	P	GO:0010388|cullin deneddylation(RCA)	other cellular processes
AT1G09410	P	GO:0008150|biological_process(ND)	unknown biological processes	C	GO:0005739|mitochondrion(ISM)	mitochondria
AT1G79550	P	GO:0006096|glycolytic process(ISS)	other metabolic processes	C	GO:0048046|apoplast(IDA)	extracellular	P	GO:0034976|response to endoplasmic reticulum stress(RCA)	other cellular processes	C	GO:0048046|apoplast(IDA)	extracellular	C	GO:0005829|cytosol(IDA)	cytosol	P	GO:0006096|glycolytic process(ISS)	electron transport or energy pathways	C	GO:0005774|vacuolar membrane(IDA)	other intracellular components	C	GO:0048046|apoplast(IDA)	extracellular	C	GO:0005774|vacuolar membrane(IDA)	other cytoplasmic components	C	GO:0005829|cytosol(IDA)	cytosol	C	GO:0005634|nucleus(IDA)	nucleus	C	GO:0005774|vacuolar membrane(IDA)	other cytoplasmic components	F	GO:0004618|phosphoglycerate kinase activity(ISS)	transferase activity	C	GO:0016020|membrane(IDA)	other membranes	C	GO:0009570|chloroplast stroma(IDA)	other cytoplasmic components	C	GO:0009570|chloroplast stroma(IDA)	chloroplast	C
AT5G26800	F	GO:0003674|molecular_function(ND)	unknown molecular functions	P	GO:0008150|biological_process(ND)	unknown biological processes	C	GO:0009507|chloroplast(ISM)	chloroplast
AT4G39530	C	GO:0005739|mitochondrion(ISM)	mitochondria	P	GO:0008150|biological_process(ND)	unknown biological processes
AT1G26750	P	GO:0008150|biological_process(ND)	unknown biological processes	F	GO:0003674|molecular_function(ND)	unknown molecular functions	C	GO:0005575|cellular_component(ND)	unknown cellular components
AT1G74030	C	GO:0009507|chloroplast(IDA)	chloroplast	P	GO:0010090|trichome morphogenesis(IMP)	cell organization and biogenesis	F	GO:0004634|phosphopyruvate hydratase activity(IDA)	other enzyme activity	C	GO:0009507|chloroplast(ISM)	chloroplast	P	GO:0010090|trichome morphogenesis(IMP)	other cellular processes	C	GO:0009570|chloroplast stroma(IDA)	plastid	F	GO:0004634|phosphopyruvate hydratase activity(ISS)	other enzyme activity	C	GO:0009570|chloroplast stroma(IDA)	other cytoplasmic components	C	GO:0009570|chloroplast stroma(IDA)	chloroplast	C	GO:0009570|chloroplast stroma(IDA)	other intracellular components	P	GO:0009735|response to cytokinin(IDA)	other biological processes
AT1G68700	F	GO:0003674|molecular_function(ND)	unknown molecular functions	C	GO:0005634|nucleus(ISM)	nucleus	P	GO:0008150|biological_process(ND)	unknown biological processes
AT4G16800	C	GO:0005739|mitochondrion(ISM)	mitochondria	P	GO:0006631|fatty acid metabolic process(ISS)	other metabolic processes	P	GO:0006631|fatty acid metabolic process(ISS)	other cellular processes	F	GO:0004300|enoyl-CoA hydratase activity(ISS)	other enzyme activity
AT2G25570	P	GO:0008150|biological_process(ND)	unknown biological processes	C	GO:0005576|extracellular region(ISM)	extracellular
AT4G28005	C	GO:0005739|mitochondrion(ISM)	mitochondria
AT3G54980	C	GO:0005739|mitochondrion(ISM)	mitochondria
AT5G16860	P	GO:0008150|biological_process(ND)	unknown biological processes	F	GO:0003674|molecular_function(ND)	unknown molecular functions	C	GO:0005739|mitochondrion(ISM)	mitochondria
AT2G35790	C	GO:0005739|mitochondrion(IDA)	mitochondria	P	GO:0001510|RNA methylation(RCA)	other cellular processes	F	GO:0003674|molecular_function(ND)	unknown molecular functions	C	GO:0005739|mitochondrion(ISM)	mitochondria	P	GO:0008150|biological_process(ND)	unknown biological processes	P	GO:0001510|RNA methylation(RCA)	other metabolic processes
AT5G53650	P	GO:0006626|protein targeting to mitochondrion(RCA)	transport	P	GO:0006626|protein targeting to mitochondrion(RCA)	other cellular processes	F	GO:0003674|molecular_function(ND)	unknown molecular functions	P	GO:0009062|fatty acid catabolic process(RCA)	other cellular processes	P	GO:0008150|biological_process(ND)	unknown biological processes	P	GO:0006626|protein targeting to mitochondrion(RCA)	cell organization and biogenesis	P	GO:0009062|fatty acid catabolic process(RCA)	other metabolic processes	C	GO:0009507|chloroplast(ISM)	chloroplast
AT5G23140	C	GO:0009570|chloroplast stroma(IDA)	chloroplast	C	GO:0009840|chloroplastic endopeptidase Clp complex(IDA)	other intracellular components	C	GO:0005739|mitochondrion(IDA)	mitochondria	C	GO:0005759|mitochondrial matrix(IDA)	other cytoplasmic components	C	GO:0009535|chloroplast thylakoid membrane(IDA)	other membranes	C	GO:0009535|chloroplast thylakoid membrane(IDA)	plastid	C	GO:0005739|mitochondrion(ISM)	mitochondria	C	GO:0005759|mitochondrial matrix(IDA)	other intracellular components	F	GO:0050897|cobalt ion binding(IDA)	other binding	C	GO:0005759|mitochondrial matrix(IDA)	mitochondria	P	GO:0019243|methylglyoxal catabolic process to D-lactate(RCA)	other cellular processes	C	GO:0009532|plastid stroma(IDA)	other cytoplasmic components	C	GO:0009535|chloroplast thylakoid membrane(IDA)	other cytoplasmic components	C	GO:0009535|chloroplast thylakoid membrane(IDA)	chloroplast	C	GO:0009840|chloroplastic endopeptidase Clp complex(IDA)	other cytoplasmic components	C	GO:0009840|chloroplastic endopeptidase Clp complex(IDA)	plastid	C
AT5G07840	P	GO:0008150|biological_process(ND)	unknown biological processes
AT5G19020	P	GO:0009410|response to xenobiotic stimulus(RCA)	other biological processes	P	GO:0009560|embryo sac egg cell differentiation(RCA)	other cellular processes	C	GO:0005739|mitochondrion(ISM)	mitochondria	P	GO:0009560|embryo sac egg cell differentiation(RCA)	developmental processes	P	GO:0080156|mitochondrial mRNA modification(IMP)	other cellular processes	P	GO:0048522|positive regulation of cellular process(RCA)	other cellular processes	F	GO:0003674|molecular_function(ND)	unknown molecular functions	P	GO:0080156|mitochondrial mRNA modification(IMP)	other metabolic processes
AT1G26460	P	GO:0008150|biological_process(ND)	unknown biological processes	C	GO:0005739|mitochondrion(ISM)	mitochondria	P	GO:0009220|pyrimidine ribonucleotide biosynthetic process(RCA)	other metabolic processes	F	GO:0003674|molecular_function(ND)	unknown molecular functions	P	GO:0009220|pyrimidine ribonucleotide biosynthetic process(RCA)	other cellular processes	C	GO:0005739|mitochondrion(IDA)	mitochondria
AT4G16835	P	GO:0008150|biological_process(ND)	unknown biological processes	C	GO:0005739|mitochondrion(ISM)	mitochondria
AT1G75330	C	GO:0009570|chloroplast stroma(IDA)	other intracellular components	P	GO:0048481|ovule development(RCA)	developmental processes	C	GO:0009570|chloroplast stroma(IDA)	plastid	C	GO:0009570|chloroplast stroma(IDA)	other intracellular components	P	GO:0006520|cellular amino acid metabolic process(ISS)	other cellular processes	P	GO:0006164|purine nucleotide biosynthetic process(RCA)	other metabolic processes	C	GO:0009507|chloroplast(ISM)	chloroplast	C	GO:0009570|chloroplast stroma(IDA)	chloroplast	F	GO:0016597|amino acid binding(ISS)	other binding	C	GO:0009570|chloroplast stroma(IDA)	plastid	C	GO:0009570|chloroplast stroma(IDA)	chloroplast	P	GO:0006520|cellular amino acid metabolic process(ISS)	other metabolic processes	C	GO:0009570|chloroplast stroma(IDA)	other cytoplasmic components	C	GO:0009570|chloroplast stroma(IDA)	other intracellular components	C	GO:0009570|chloroplast stroma(IDA)	chloroplast	C	GO:0009570|chloroplast stroma(IDA)	other cytoplasmic components	F
AT2G03380	P	GO:0008150|biological_process(ND)	unknown biological processes	C	GO:0005739|mitochondrion(ISM)	mitochondria
AT2G27490	F	GO:0004140|dephospho-CoA kinase activity(IDA)	kinase activity	P	GO:0015937|coenzyme A biosynthetic process(ISS)	other cellular processes	P	GO:0015937|coenzyme A biosynthetic process(IDA)	other metabolic processes	C	GO:0005773|vacuole(IDA)	other intracellular components	C	GO:0005737|cytoplasm(ISM)	other cytoplasmic components	P	GO:0015824|proline transport(RCA)	transport	F	GO:0004140|dephospho-CoA kinase activity(ISS)	kinase activity	C	GO:0009507|chloroplast(IDA)	chloroplast	C	GO:0005777|peroxisome(IDA)	other intracellular components	F	GO:0004140|dephospho-CoA kinase activity(ISS)	transferase activity	C	GO:0009507|chloroplast(IDA)	chloroplast	F	GO:0004140|dephospho-CoA kinase activity(IDA)	transferase activity	F	GO:0005524|ATP binding(ISS)	other binding	P	GO:0015937|coenzyme A biosynthetic process(ISS)	other metabolic processes	C	GO:0005773|vacuole(IDA)	other cytoplasmic components	C	GO:0005773|vacuole(IDA)	other intracellular components	C
AT5G06400	P	GO:0008150|biological_process(ND)	unknown biological processes	C	GO:0005739|mitochondrion(ISM)	mitochondria	F	GO:0003674|molecular_function(ND)	unknown molecular functions
AT5G09770	P	GO:0009086|methionine biosynthetic process(RCA)	other metabolic processes	C	GO:0009507|chloroplast(ISM)	chloroplast	P	GO:0006354|DNA-templated transcription, elongation(RCA)	other cellular processes	P	GO:0006354|DNA-templated transcription, elongation(RCA)	other metabolic processes	P	GO:0000394|RNA splicing, via endonucleolytic cleavage and ligation(RCA)	other cellular processes	C	GO:0005840|ribosome(ISS)	ribosome	P	GO:0009086|methionine biosynthetic process(RCA)	other cellular processes	P	GO:0006354|DNA-templated transcription, elongation(RCA)	transcription,DNA-dependent	P	GO:0000394|RNA splicing, via endonucleolytic cleavage and ligation(RCA)	other metabolic processes
AT1G12775	C	GO:0005739|mitochondrion(ISM)	mitochondria
AT2G02750	C	GO:0005739|mitochondrion(ISM)	mitochondria	P	GO:0008150|biological_process(ND)	unknown biological processes
AT5G63150	F	GO:0003674|molecular_function(ND)	unknown molecular functions	P	GO:0008150|biological_process(ND)	unknown biological processes
AT5G65560	F	GO:0003674|molecular_function(ND)	unknown molecular functions	P	GO:0008150|biological_process(ND)	unknown biological processes	C	GO:0005739|mitochondrion(ISM)	mitochondria
AT1G50270	P	GO:0009887|organ morphogenesis(RCA)	developmental processes	P	GO:0007129|synapsis(RCA)	other cellular processes	P	GO:0007062|sister chromatid cohesion(RCA)	cell organization and biogenesis	P	GO:0010638|positive regulation of organelle organization(RCA)	cell organization and biogenesis	P	GO:0007129|synapsis(RCA)	cell organization and biogenesis	P	GO:0007131|reciprocal meiotic recombination(RCA)	other metabolic processes	P	GO:0009888|tissue development(RCA)	other biological processes	C	GO:0005739|mitochondrion(ISM)	mitochondria	P	GO:0008150|biological_process(ND)	unknown biological processes	P	GO:0042138|meiotic DNA double-strand break formation(RCA)	cell organization and biogenesis	P	GO:0007062|sister chromatid cohesion(RCA)	other cellular processes	P	GO:0042138|meiotic DNA double-strand break formation(RCA)	other cellular processes	P	GO:0045132|meiotic chromosome segregation(RCA)	cell organization and biogenesis	P	GO:0010638|positive regulation of organelle organization(RCA)	other cellular processes	P	GO:0007131|reciprocal meiotic recombination(RCA)	DNA or RNA metabolism	P	GO:0007131|reciprocal meiotic recombination(RCA)	cell organization and biogenesis	P
AT5G25500	C	GO:0005739|mitochondrion(ISM)	mitochondria	P	GO:0008150|biological_process(ND)	unknown biological processes	F	GO:0003674|molecular_function(ND)	unknown molecular functions
AT1G24180	F	GO:0008270|zinc ion binding(IDA)	other binding	C	GO:0005739|mitochondrion(IDA)	mitochondria	P	GO:0006098|pentose-phosphate shunt(RCA)	other cellular processes	P	GO:0006007|glucose catabolic process(RCA)	other metabolic processes	F	GO:0004739|pyruvate dehydrogenase (acetyl-transferring) activity(ISS)	other enzyme activity	P	GO:0009651|response to salt stress(IEP)	response to abiotic or biotic stimulus	P	GO:0009651|response to salt stress(RCA)	response to stress	C	GO:0005739|mitochondrion(IDA)	mitochondria	C	GO:0005634|nucleus(IDA)	nucleus	C	GO:0005829|cytosol(IDA)	cytosol	F	GO:0050897|cobalt ion binding(IDA)	other binding	C	GO:0005739|mitochondrion(IDA)	mitochondria	P	GO:0008152|metabolic process(ISS)	other metabolic processes	P	GO:0009651|response to salt stress(IEP)	response to stress	P	GO:0009744|response to sucrose(RCA)	other biological processes	P	GO:0009749|response to glucose(RCA)	other biological processes	P
AT4G30010	P	GO:0006511|ubiquitin-dependent protein catabolic process(RCA)	protein metabolism	C	GO:0005739|mitochondrion(ISM)	mitochondria	P	GO:0080129|proteasome core complex assembly(RCA)	cell organization and biogenesis	P	GO:0009853|photorespiration(RCA)	other cellular processes	P	GO:0006096|glycolytic process(RCA)	other cellular processes	P	GO:0009060|aerobic respiration(RCA)	other cellular processes	P	GO:0006511|ubiquitin-dependent protein catabolic process(RCA)	other metabolic processes	P	GO:0009060|aerobic respiration(RCA)	other metabolic processes	F	GO:0003674|molecular_function(ND)	unknown molecular functions	C	GO:0005753|mitochondrial proton-transporting ATP synthase complex(IDA)	other membranes	C	GO:0005739|mitochondrion(IDA)	mitochondria	P	GO:0009853|photorespiration(RCA)	other metabolic processes	C	GO:0005753|mitochondrial proton-transporting ATP synthase complex(IDA)	other cytoplasmic components	P	GO:0006096|glycolytic process(RCA)	electron transport or energy pathways	P	GO:0006096|glycolytic process(RCA)	other metabolic processes	C	GO:0005753|mitochondrial proton-transporting ATP synthase complex(IDA)	other intracellular components	C
AT2G15980	C	GO:0005739|mitochondrion(ISM)	mitochondria	F	GO:0003674|molecular_function(ND)	unknown molecular functions	P	GO:0008150|biological_process(ND)	unknown biological processes
AT5G39680	P	GO:0034976|response to endoplasmic reticulum stress(RCA)	other cellular processes	P	GO:0009793|embryo development ending in seed dormancy(NAS)	developmental processes	P	GO:0034976|response to endoplasmic reticulum stress(RCA)	response to stress	P	GO:0009627|systemic acquired resistance(RCA)	response to stress	C	GO:0005739|mitochondrion(ISM)	mitochondria	P	GO:0009627|systemic acquired resistance(RCA)	response to abiotic or biotic stimulus
AT4G01990	P	GO:0008150|biological_process(ND)	unknown biological processes	C	GO:0005739|mitochondrion(ISM)	mitochondria	P	GO:0009560|embryo sac egg cell differentiation(RCA)	other cellular processes	P	GO:0009560|embryo sac egg cell differentiation(RCA)	developmental processes
AT3G03070	P	GO:0006661|phosphatidylinositol biosynthetic process(RCA)	other cellular processes	C	GO:0005739|mitochondrion(ISM)	mitochondria	P	GO:0006661|phosphatidylinositol biosynthetic process(RCA)	other metabolic processes	C	GO:0005739|mitochondrion(IDA)	mitochondria
AT1G17510	C	GO:0005739|mitochondrion(ISM)	mitochondria	F	GO:0003674|molecular_function(ND)	unknown molecular functions	P	GO:0008150|biological_process(ND)	unknown biological processes
AT1G76480	F	GO:0003674|molecular_function(ND)	unknown molecular functions	P	GO:0008150|biological_process(ND)	unknown biological processes	C	GO:0005739|mitochondrion(ISM)	mitochondria	C	GO:0005739|mitochondrion(ISM)	mitochondria
AT5G23250	P	GO:0006626|protein targeting to mitochondrion(RCA)	transport	C	GO:0005739|mitochondrion(IDA)	mitochondria	C	GO:0005739|mitochondrion(IDA)	mitochondria	P	GO:0008152|metabolic process(ISS)	other metabolic processes	P	GO:0006626|protein targeting to mitochondrion(RCA)	other cellular processes	C	GO:0005739|mitochondrion(IDA)	mitochondria	C	GO:0005739|mitochondrion(ISM)	mitochondria	F	GO:0005507|copper ion binding(IDA)	other binding	P	GO:0009220|pyrimidine ribonucleotide biosynthetic process(RCA)	other metabolic processes	P	GO:0009220|pyrimidine ribonucleotide biosynthetic process(RCA)	other cellular processes	F	GO:0004776|succinate-CoA ligase (GDP-forming) activity(ISS)	other enzyme activity	C	GO:0005739|mitochondrion(ISM)	mitochondria	P	GO:0006626|protein targeting to mitochondrion(RCA)	cell organization and biogenesis
AT2G41080	P	GO:0008150|biological_process(ND)	unknown biological processes	F	GO:0003674|molecular_function(ND)	unknown molecular functions	C	GO:0005739|mitochondrion(ISM)	mitochondria
AT2G35795	P	GO:0006457|protein folding(ISS)	other cellular processes	P	GO:0006457|protein folding(ISS)	protein metabolism	P	GO:0006457|protein folding(ISS)	other metabolic processes	C	GO:0005737|cytoplasm(ISM)	other cytoplasmic components
AT3G09040	P	GO:0008150|biological_process(ND)	unknown biological processes	C	GO:0005739|mitochondrion(ISM)	mitochondria	F	GO:0003674|molecular_function(ND)	unknown molecular functions
AT3G11510	C	GO:0022626|cytosolic ribosome(IDA)	ribosome	C	GO:0022626|cytosolic ribosome(IDA)	ribosome	C	GO:0022627|cytosolic small ribosomal subunit(ISS)	ribosome	P	GO:0006412|translation(ISS)	other metabolic processes	C	GO:0022627|cytosolic small ribosomal subunit(IDA)	cytosol	C	GO:0005737|cytoplasm(ISM)	other cytoplasmic components	F	GO:0003735|structural constituent of ribosome(ISS)	structural molecule activity	C	GO:0005730|nucleolus(IDA)	other intracellular components	C	GO:0022626|cytosolic ribosome(IDA)	ribosome	P	GO:0006412|translation(ISS)	protein metabolism	P	GO:0006412|translation(ISS)	other cellular processes	C	GO:0022627|cytosolic small ribosomal subunit(IDA)	ribosome	C	GO:0022627|cytosolic small ribosomal subunit(IDA)	other intracellular components	C	GO:0022626|cytosolic ribosome(IDA)	other intracellular components	C	GO:0005730|nucleolus(IDA)	nucleus	C	GO:0022626|cytosolic ribosome(IDA)	other cytoplasmic components	C
AT4G30920	P	GO:0006508|proteolysis(ISS)	protein metabolism	C	GO:0005773|vacuole(IDA)	other intracellular components	C	GO:0009570|chloroplast stroma(IDA)	other cytoplasmic components	C	GO:0005829|cytosol(IDA)	cytosol	F	GO:0004177|aminopeptidase activity(ISS)	hydrolase activity	C	GO:0005773|vacuole(IDA)	other cytoplasmic components	C	GO:0009570|chloroplast stroma(IDA)	chloroplast	F	GO:0004177|aminopeptidase activity(IDA)	hydrolase activity	C	GO:0009570|chloroplast stroma(IDA)	plastid	P	GO:0010150|leaf senescence(IMP)	developmental processes	C	GO:0009507|chloroplast(IDA)	chloroplast	C	GO:0009570|chloroplast stroma(IDA)	other intracellular components	C	GO:0009507|chloroplast(ISM)	chloroplast
AT2G35030	P	GO:0008150|biological_process(ND)	unknown biological processes	C	GO:0005739|mitochondrion(ISM)	mitochondria
AT3G27240	C	GO:0005746|mitochondrial respiratory chain(ISS)	other intracellular components	C	GO:0005773|vacuole(IDA)	other intracellular components	C	GO:0005886|plasma membrane(IDA)	plasma membrane	P	GO:0051788|response to misfolded protein(RCA)	response to stress	C	GO:0005750|mitochondrial respiratory chain complex III(IDA)	mitochondria	C	GO:0005746|mitochondrial respiratory chain(ISS)	other membranes	F	GO:0045153|electron transporter, transferring electrons within CoQH2-cytochrome c reductase complex activity(ISS)	other molecular functions	P	GO:0046686|response to cadmium ion(RCA)	other biological processes	P	GO:0006098|pentose-phosphate shunt(RCA)	other cellular processes	C	GO:0005774|vacuolar membrane(IDA)	other membranes	C	GO:0005739|mitochondrion(IDA)	mitochondria	P	GO:0009853|photorespiration(RCA)	other cellular processes	P	GO:0009853|photorespiration(RCA)	other metabolic processes	C	GO:0005750|mitochondrial respiratory chain complex III(IDA)	other cytoplasmic components	P	GO:0006096|glycolytic process(RCA)	electron transport or energy pathways	P	GO:0006511|ubiquitin-dependent protein catabolic process(RCA)	other cellular processes	P
AT2G04795	F	GO:0003674|molecular_function(ND)	unknown molecular functions	P	GO:0006979|response to oxidative stress(IMP)	response to stress
AT2G27610	P	GO:0008150|biological_process(ND)	unknown biological processes	F	GO:0003674|molecular_function(ND)	unknown molecular functions	C	GO:0005739|mitochondrion(ISM)	mitochondria
AT5G16420	F	GO:0003674|molecular_function(ND)	unknown molecular functions	C	GO:0005739|mitochondrion(ISM)	mitochondria	P	GO:0008150|biological_process(ND)	unknown biological processes
AT4G21105	C	GO:0005774|vacuolar membrane(IDA)	other membranes	C	GO:0005774|vacuolar membrane(IDA)	other cytoplasmic components	C	GO:0005739|mitochondrion(ISM)	mitochondria	C	GO:0005739|mitochondrion(IDA)	mitochondria	C	GO:0005774|vacuolar membrane(IDA)	other cytoplasmic components	C	GO:0005774|vacuolar membrane(IDA)	other intracellular components	P	GO:0006623|protein targeting to vacuole(RCA)	transport	C	GO:0005739|mitochondrion(ISM)	mitochondria	C	GO:0005774|vacuolar membrane(IDA)	other membranes	C	GO:0005774|vacuolar membrane(IDA)	other intracellular components
AT1G13410	F	GO:0003674|molecular_function(ND)	unknown molecular functions	C	GO:0005739|mitochondrion(ISM)	mitochondria	P	GO:0008150|biological_process(ND)	unknown biological processes
AT4G26780	P	GO:0010286|heat acclimation(IGI)	response to abiotic or biotic stimulus	C	GO:0005739|mitochondrion(IDA)	mitochondria	P	GO:0006457|protein folding(ISS)	protein metabolism	F	GO:0005507|copper ion binding(IDA)	other binding	P	GO:0006457|protein folding(ISS)	other cellular processes	C	GO:0009507|chloroplast(ISM)	chloroplast	P	GO:0009220|pyrimidine ribonucleotide biosynthetic process(RCA)	other metabolic processes	P	GO:0006457|protein folding(ISS)	other metabolic processes	P	GO:0009220|pyrimidine ribonucleotide biosynthetic process(RCA)	other cellular processes	P	GO:0006626|protein targeting to mitochondrion(RCA)	cell organization and biogenesis	P	GO:0010286|heat acclimation(IGI)	response to stress	P	GO:0006626|protein targeting to mitochondrion(RCA)	transport	P	GO:0006626|protein targeting to mitochondrion(RCA)	other cellular processes	P	GO:0009408|response to heat(IEP)	response to stress	C	GO:0005739|mitochondrion(IDA)	mitochondria	P	GO:0009408|response to heat(IEP)	response to abiotic or biotic stimulus
AT3G55440	C	GO:0009570|chloroplast stroma(IDA)	chloroplast	P	GO:0009060|aerobic respiration(RCA)	other cellular processes	P	GO:0006096|glycolytic process(IC)	electron transport or energy pathways	P	GO:0019344|cysteine biosynthetic process(RCA)	other cellular processes	C	GO:0005739|mitochondrion(IDA)	mitochondria	C	GO:0009570|chloroplast stroma(IDA)	other intracellular components	P	GO:0018119|peptidyl-cysteine S-nitrosylation(IDA)	other metabolic processes	P	GO:0044262|cellular carbohydrate metabolic process(IDA)	other cellular processes	P	GO:0046686|response to cadmium ion(RCA)	other biological processes	P	GO:0009651|response to salt stress(IEP)	response to stress	P	GO:0019344|cysteine biosynthetic process(RCA)	other metabolic processes	C	GO:0009570|chloroplast stroma(IDA)	other intracellular components	C	GO:0005739|mitochondrion(IDA)	mitochondria	C	GO:0005829|cytosol(ISS)	cytosol	C	GO:0009570|chloroplast stroma(IDA)	plastid	P	GO:0007030|Golgi organization(RCA)	cell organization and biogenesis	C
AT3G47930	P	GO:0009853|photorespiration(RCA)	other metabolic processes	C	GO:0005739|mitochondrion(IDA)	mitochondria	P	GO:0009853|photorespiration(RCA)	other cellular processes	P	GO:0019853|L-ascorbic acid biosynthetic process(TAS)	other cellular processes	C	GO:0005739|mitochondrion(ISM)	mitochondria	F	GO:0080049|L-gulono-1,4-lactone dehydrogenase activity(IDA)	other enzyme activity	C	GO:0005739|mitochondrion(IDA)	mitochondria	C	GO:0009536|plastid(IDA)	plastid	C	GO:0005739|mitochondrion(ISM)	mitochondria	C	GO:0005739|mitochondrion(IDA)	mitochondria	C	GO:0005739|mitochondrion(IDA)	mitochondria	F	GO:0016633|galactonolactone dehydrogenase activity(IDA)	other enzyme activity	P	GO:0019853|L-ascorbic acid biosynthetic process(TAS)	other metabolic processes
AT1G30290	F	GO:0003674|molecular_function(ND)	unknown molecular functions	P	GO:0008150|biological_process(ND)	unknown biological processes	C	GO:0005739|mitochondrion(ISM)	mitochondria
AT3G27340	C	GO:0009507|chloroplast(ISM)	chloroplast	F	GO:0003674|molecular_function(ND)	unknown molecular functions	C	GO:0005739|mitochondrion(ISM)	mitochondria
AT4G31810	C	GO:0005739|mitochondrion(IDA)	mitochondria	P	GO:0009640|photomorphogenesis(RCA)	response to abiotic or biotic stimulus	P	GO:0009220|pyrimidine ribonucleotide biosynthetic process(RCA)	other metabolic processes	F	GO:0003860|3-hydroxyisobutyryl-CoA hydrolase activity(ISS)	hydrolase activity	P	GO:0034968|histone lysine methylation(RCA)	protein metabolism	P	GO:0009640|photomorphogenesis(RCA)	developmental processes	P	GO:0010388|cullin deneddylation(RCA)	other metabolic processes	P	GO:0034968|histone lysine methylation(RCA)	other metabolic processes	P	GO:0009909|regulation of flower development(RCA)	developmental processes	P	GO:0010388|cullin deneddylation(RCA)	other cellular processes	P	GO:0034968|histone lysine methylation(RCA)	cell organization and biogenesis	P	GO:0009220|pyrimidine ribonucleotide biosynthetic process(RCA)	other cellular processes	C	GO:0005739|mitochondrion(IDA)	mitochondria	P	GO:0010388|cullin deneddylation(RCA)	protein metabolism	P	GO:0006635|fatty acid beta-oxidation(ISS)	other cellular processes	P	GO:0006635|fatty acid beta-oxidation(ISS)	other metabolic processes	P
AT4G30910	C	GO:0009507|chloroplast(ISM)	chloroplast	C	GO:0009570|chloroplast stroma(IDA)	other intracellular components	C	GO:0009570|chloroplast stroma(IDA)	plastid	C	GO:0009570|chloroplast stroma(IDA)	chloroplast	P	GO:0006508|proteolysis(ISS)	protein metabolism	C	GO:0009570|chloroplast stroma(IDA)	other cytoplasmic components	F	GO:0004177|aminopeptidase activity(ISS)	hydrolase activity	C	GO:0009507|chloroplast(IDA)	chloroplast
AT5G08310	C	GO:0005739|mitochondrion(ISM)	mitochondria	P	GO:0008150|biological_process(ND)	unknown biological processes
AT2G45520	F	GO:0003674|molecular_function(ND)	unknown molecular functions	C	GO:0005739|mitochondrion(ISM)	mitochondria	P	GO:0008150|biological_process(ND)	unknown biological processes
AT5G11480	P	GO:0006364|rRNA processing(RCA)	other cellular processes	C	GO:0009507|chloroplast(ISM)	chloroplast	P	GO:0009658|chloroplast organization(RCA)	other cellular processes	P	GO:0009658|chloroplast organization(RCA)	cell organization and biogenesis	P	GO:0006399|tRNA metabolic process(RCA)	other cellular processes	P	GO:0006364|rRNA processing(RCA)	other metabolic processes	P	GO:0006399|tRNA metabolic process(RCA)	other metabolic processes
AT1G02420	P	GO:0008150|biological_process(ND)	unknown biological processes	C	GO:0005739|mitochondrion(ISM)	mitochondria	F	GO:0003674|molecular_function(ND)	unknown molecular functions
AT3G18840	C	GO:0005739|mitochondrion(ISM)	mitochondria
AT1G06270	C	GO:0042170|plastid membrane(IDA)	other membranes	C	GO:0042170|plastid membrane(IDA)	other intracellular components	P	GO:0008150|biological_process(ND)	unknown biological processes	C	GO:0042170|plastid membrane(IDA)	other cytoplasmic components	C	GO:0042170|plastid membrane(IDA)	plastid	C	GO:0005739|mitochondrion(ISM)	mitochondria	F	GO:0003674|molecular_function(ND)	unknown molecular functions
AT2G21870	C	GO:0005739|mitochondrion(IDA)	mitochondria	C	GO:0009507|chloroplast(ISM)	chloroplast	C	GO:0005753|mitochondrial proton-transporting ATP synthase complex(IDA)	other intracellular components	C	GO:0009507|chloroplast(IDA)	chloroplast	P	GO:0006511|ubiquitin-dependent protein catabolic process(RCA)	other cellular processes	C	GO:0005739|mitochondrion(IDA)	mitochondria	C	GO:0005730|nucleolus(IDA)	other intracellular components	C	GO:0005739|mitochondrion(IDA)	mitochondria	F	GO:0050897|cobalt ion binding(IDA)	other binding	C	GO:0005753|mitochondrial proton-transporting ATP synthase complex(IDA)	other intracellular components	C	GO:0005753|mitochondrial proton-transporting ATP synthase complex(IDA)	mitochondria	F	GO:0005507|copper ion binding(IDA)	other binding	C	GO:0005739|mitochondrion(IDA)	mitochondria	C	GO:0016020|membrane(IDA)	other membranes	C	GO:0009507|chloroplast(ISM)	chloroplast	C	GO:0005753|mitochondrial proton-transporting ATP synthase complex(IDA)	other membranes	P
AT5G52840	C	GO:0031966|mitochondrial membrane(IDA)	other cytoplasmic components	P	GO:0009853|photorespiration(RCA)	other metabolic processes	P	GO:0009651|response to salt stress(RCA)	response to abiotic or biotic stimulus	C	GO:0031966|mitochondrial membrane(IDA)	other intracellular components	C	GO:0005739|mitochondrion(IDA)	mitochondria	P	GO:0080129|proteasome core complex assembly(RCA)	cell organization and biogenesis	C	GO:0005747|mitochondrial respiratory chain complex I(IDA)	other membranes	P	GO:0006098|pentose-phosphate shunt(RCA)	other metabolic processes	P	GO:0051788|response to misfolded protein(RCA)	response to stress	C	GO:0005739|mitochondrion(IDA)	mitochondria	C	GO:0016020|membrane(IDA)	other membranes	C	GO:0005739|mitochondrion(ISM)	mitochondria	C	GO:0031966|mitochondrial membrane(IDA)	mitochondria	C	GO:0009507|chloroplast(IDA)	chloroplast	P	GO:0009853|photorespiration(TAS)	other metabolic processes	P	GO:0006511|ubiquitin-dependent protein catabolic process(RCA)	protein metabolism	C
AT3G15020	P	GO:0042742|defense response to bacterium(IEP)	response to stress	P	GO:0009853|photorespiration(RCA)	other metabolic processes	P	GO:0042742|defense response to bacterium(IEP)	response to abiotic or biotic stimulus	C	GO:0005739|mitochondrion(ISM)	mitochondria	F	GO:0030060|L-malate dehydrogenase activity(IGI)	other enzyme activity	C	GO:0048046|apoplast(IDA)	extracellular	P	GO:0042742|defense response to bacterium(IEP)	response to stress	C	GO:0048046|apoplast(IDA)	extracellular	C	GO:0016020|membrane(IDA)	other membranes	C	GO:0005739|mitochondrion(ISM)	mitochondria	F	GO:0016615|malate dehydrogenase activity(ISS)	other enzyme activity	F	GO:0005507|copper ion binding(IDA)	other binding	P	GO:0009853|photorespiration(RCA)	other cellular processes	P	GO:0042742|defense response to bacterium(IEP)	response to abiotic or biotic stimulus	C	GO:0048046|apoplast(IDA)	extracellular	C	GO:0016020|membrane(IDA)	other membranes	C
AT5G39710	P	GO:0009793|embryo development ending in seed dormancy(NAS)	developmental processes	C	GO:0005739|mitochondrion(ISM)	mitochondria	C	GO:0005739|mitochondrion(IDA)	mitochondria
AT5G56090	P	GO:0016126|sterol biosynthetic process(RCA)	other metabolic processes	C	GO:0005739|mitochondrion(ISM)	mitochondria	P	GO:0019745|pentacyclic triterpenoid biosynthetic process(RCA)	other metabolic processes	C	GO:0005739|mitochondrion(IDA)	mitochondria	P	GO:0006461|protein complex assembly(ISS)	cell organization and biogenesis	C	GO:0016020|membrane(ISS)	other membranes	P	GO:0019745|pentacyclic triterpenoid biosynthetic process(RCA)	other cellular processes
AT5G19830	P	GO:0006783|heme biosynthetic process(RCA)	other metabolic processes	P	GO:0006783|heme biosynthetic process(RCA)	other cellular processes	C	GO:0005739|mitochondrion(ISM)	mitochondria	P	GO:0006412|translation(ISS)	other metabolic processes	P	GO:0006412|translation(ISS)	protein metabolism	P	GO:0006412|translation(ISS)	other cellular processes	F	GO:0004045|aminoacyl-tRNA hydrolase activity(ISS)	hydrolase activity
AT2G36160	C	GO:0022627|cytosolic small ribosomal subunit(ISS)	other intracellular components	C	GO:0009506|plasmodesma(IDA)	other cellular components	C	GO:0022627|cytosolic small ribosomal subunit(IDA)	other intracellular components	C	GO:0005829|cytosol(IDA)	cytosol	C	GO:0022626|cytosolic ribosome(IDA)	other intracellular components	C	GO:0022626|cytosolic ribosome(IDA)	other cytoplasmic components	C	GO:0022627|cytosolic small ribosomal subunit(IDA)	cytosol	P	GO:0042545|cell wall modification(RCA)	other cellular processes	C	GO:0022626|cytosolic ribosome(IDA)	cytosol	C	GO:0005774|vacuolar membrane(IDA)	other membranes	C	GO:0016020|membrane(IDA)	other membranes	P	GO:0006412|translation(ISS)	other metabolic processes	C	GO:0022626|cytosolic ribosome(IDA)	ribosome	C	GO:0022627|cytosolic small ribosomal subunit(IDA)	ribosome	C	GO:0022627|cytosolic small ribosomal subunit(ISS)	other cytoplasmic components	C	GO:0022627|cytosolic small ribosomal subunit(IDA)	other cytoplasmic components	P
AT1G71210	P	GO:0008150|biological_process(ND)	unknown biological processes	C	GO:0005739|mitochondrion(ISM)	mitochondria
AT2G19680	P	GO:0015992|proton transport(ISS)	transport	C	GO:0005739|mitochondrion(IDA)	mitochondria
AT3G61170	P	GO:0008150|biological_process(ND)	unknown biological processes	C	GO:0005739|mitochondrion(ISM)	mitochondria
AT1G02150	C	GO:0005739|mitochondrion(ISM)	mitochondria	C	GO:0009507|chloroplast(IDA)	chloroplast	P	GO:0019288|isopentenyl diphosphate biosynthetic process, methylerythritol 4-phosphate pathway(RCA)	other metabolic processes	P	GO:0006399|tRNA metabolic process(RCA)	other metabolic processes	P	GO:0045036|protein targeting to chloroplast(RCA)	transport	P	GO:0006364|rRNA processing(RCA)	other metabolic processes	P	GO:0019288|isopentenyl diphosphate biosynthetic process, methylerythritol 4-phosphate pathway(RCA)	other cellular processes	P	GO:0006364|rRNA processing(RCA)	other cellular processes	P	GO:0009658|chloroplast organization(RCA)	cell organization and biogenesis	P	GO:0006399|tRNA metabolic process(RCA)	other cellular processes	P	GO:0009658|chloroplast organization(RCA)	other cellular processes
AT2G20420	C	GO:0005739|mitochondrion(IDA)	mitochondria	F	GO:0005524|ATP binding(IDA)	other binding	C	GO:0005739|mitochondrion(IDA)	mitochondria	P	GO:0006096|glycolytic process(RCA)	electron transport or energy pathways	P	GO:0006511|ubiquitin-dependent protein catabolic process(RCA)	other metabolic processes	P	GO:0009853|photorespiration(RCA)	other cellular processes	P	GO:0051788|response to misfolded protein(RCA)	response to stress	P	GO:0006511|ubiquitin-dependent protein catabolic process(RCA)	protein metabolism	C	GO:0005739|mitochondrion(IDA)	mitochondria	C	GO:0005739|mitochondrion(ISM)	mitochondria	P	GO:0009853|photorespiration(RCA)	other metabolic processes	P	GO:0008152|metabolic process(ISS)	other metabolic processes	C	GO:0005739|mitochondrion(IDA)	mitochondria	C	GO:0005739|mitochondrion(IDA)	mitochondria	P	GO:0046686|response to cadmium ion(IEP)	other biological processes	P	GO:0006094|gluconeogenesis(RCA)	other metabolic processes	P
AT4G29430	F	GO:0003735|structural constituent of ribosome(ISS)	structural molecule activity	C	GO:0022626|cytosolic ribosome(IDA)	ribosome	C	GO:0022627|cytosolic small ribosomal subunit(IDA)	cytosol	P	GO:0006412|translation(ISS)	other metabolic processes	C	GO:0022627|cytosolic small ribosomal subunit(ISS)	other intracellular components	C	GO:0022626|cytosolic ribosome(IDA)	cytosol	C	GO:0022626|cytosolic ribosome(IDA)	other intracellular components	C	GO:0005773|vacuole(IDA)	other intracellular components	C	GO:0022626|cytosolic ribosome(IDA)	other cytoplasmic components	P	GO:0006412|translation(ISS)	other cellular processes	C	GO:0009507|chloroplast(ISM)	chloroplast	C	GO:0005773|vacuole(IDA)	other cytoplasmic components	C	GO:0022627|cytosolic small ribosomal subunit(IDA)	other cytoplasmic components	P	GO:0006412|translation(ISS)	protein metabolism	C	GO:0022627|cytosolic small ribosomal subunit(IDA)	other intracellular components	C	GO:0022627|cytosolic small ribosomal subunit(ISS)	ribosome	C
AT5G64670	P	GO:0006354|DNA-templated transcription, elongation(RCA)	transcription,DNA-dependent	P	GO:0009220|pyrimidine ribonucleotide biosynthetic process(RCA)	other cellular processes	P	GO:0006354|DNA-templated transcription, elongation(RCA)	other cellular processes	P	GO:0009220|pyrimidine ribonucleotide biosynthetic process(RCA)	other metabolic processes	P	GO:0006412|translation(ISS)	protein metabolism	F	GO:0003735|structural constituent of ribosome(ISS)	structural molecule activity	C	GO:0005840|ribosome(ISS)	ribosome	P	GO:0006412|translation(ISS)	other cellular processes	C	GO:0005739|mitochondrion(ISM)	mitochondria	P	GO:0042254|ribosome biogenesis(ISS)	other biological processes	P	GO:0006354|DNA-templated transcription, elongation(RCA)	other metabolic processes	P	GO:0006412|translation(ISS)	other metabolic processes
AT4G11690	C	GO:0005739|mitochondrion(ISM)	mitochondria
AT1G69485	C	GO:0005634|nucleus(ISM)	nucleus
AT1G30960	C	GO:0005829|cytosol(IDA)	cytosol	F	GO:0005525|GTP binding(ISS)	nucleotide binding	F	GO:0005525|GTP binding(ISS)	other binding	P	GO:0006897|endocytosis(RCA)	transport	C	GO:0009507|chloroplast(ISM)	chloroplast
AT2G46540	C	GO:0005739|mitochondrion(IDA)	mitochondria	C	GO:0016020|membrane(IDA)	other membranes	C	GO:0005739|mitochondrion(IDA)	mitochondria	F	GO:0003674|molecular_function(ND)	unknown molecular functions	P	GO:0009735|response to cytokinin(IDA)	other biological processes	C	GO:0005739|mitochondrion(IDA)	mitochondria
AT5G14290	F	GO:0003674|molecular_function(ND)	unknown molecular functions	P	GO:0008150|biological_process(ND)	unknown biological processes
AT3G04130	P	GO:0008150|biological_process(ND)	unknown biological processes	C	GO:0005739|mitochondrion(ISM)	mitochondria	F	GO:0003674|molecular_function(ND)	unknown molecular functions	C	GO:0005739|mitochondrion(ISM)	mitochondria
AT1G77910	P	GO:0008150|biological_process(ND)	unknown biological processes	C	GO:0005739|mitochondrion(ISM)	mitochondria	F	GO:0003674|molecular_function(ND)	unknown molecular functions
AT2G17670	P	GO:0006626|protein targeting to mitochondrion(RCA)	cell organization and biogenesis	P	GO:0008150|biological_process(ND)	unknown biological processes	P	GO:0006626|protein targeting to mitochondrion(RCA)	other cellular processes	C	GO:0005739|mitochondrion(ISM)	mitochondria	P	GO:0006626|protein targeting to mitochondrion(RCA)	transport	C	GO:0005739|mitochondrion(ISM)	mitochondria
AT4G19220	P	GO:0008150|biological_process(ND)	unknown biological processes	F	GO:0003674|molecular_function(ND)	unknown molecular functions	C	GO:0005739|mitochondrion(ISM)	mitochondria
ATCG00650	P	GO:0010207|photosystem II assembly(RCA)	electron transport or energy pathways	C	GO:0009570|chloroplast stroma(IDA)	other cytoplasmic components	C	GO:0009507|chloroplast(TAS)	chloroplast	P	GO:0006412|translation(TAS)	protein metabolism	P	GO:0006412|translation(TAS)	other cellular processes	P	GO:0006354|DNA-templated transcription, elongation(RCA)	other cellular processes	C	GO:0009570|chloroplast stroma(IDA)	other intracellular components	C	GO:0000312|plastid small ribosomal subunit(TAS)	ribosome	C	GO:0000312|plastid small ribosomal subunit(TAS)	plastid	P	GO:0010207|photosystem II assembly(RCA)	other metabolic processes	C	GO:0009941|chloroplast envelope(IDA)	chloroplast	C	GO:0009570|chloroplast stroma(IDA)	other intracellular components	P	GO:0006091|generation of precursor metabolites and energy(RCA)	electron transport or energy pathways	C	GO:0009941|chloroplast envelope(IDA)	other cytoplasmic components	C	GO:0009941|chloroplast envelope(IDA)	chloroplast	P	GO:0006412|translation(TAS)	other metabolic processes	P
AT4G27090	C	GO:0005774|vacuolar membrane(IDA)	other cytoplasmic components	P	GO:0006412|translation(ISS)	protein metabolism	C	GO:0005840|ribosome(ISS)	ribosome	C	GO:0022625|cytosolic large ribosomal subunit(IDA)	ribosome	C	GO:0005829|cytosol(IDA)	cytosol	C	GO:0022626|cytosolic ribosome(IDA)	cytosol	C	GO:0022625|cytosolic large ribosomal subunit(IDA)	cytosol	C	GO:0022625|cytosolic large ribosomal subunit(IDA)	other cytoplasmic components	C	GO:0022626|cytosolic ribosome(IDA)	other intracellular components	C	GO:0005773|vacuole(IDA)	other cytoplasmic components	C	GO:0005774|vacuolar membrane(IDA)	other intracellular components	C	GO:0022626|cytosolic ribosome(IDA)	other cytoplasmic components	C	GO:0022626|cytosolic ribosome(IDA)	other intracellular components	P	GO:0001510|RNA methylation(RCA)	other metabolic processes	P	GO:0001510|RNA methylation(RCA)	other cellular processes	C	GO:0005730|nucleolus(IDA)	nucleus	C
AT1G26500	F	GO:0003674|molecular_function(ND)	unknown molecular functions	P	GO:0008150|biological_process(ND)	unknown biological processes	C	GO:0005739|mitochondrion(ISM)	mitochondria
AT2G19720	C	GO:0022627|cytosolic small ribosomal subunit(ISS)	other intracellular components	C	GO:0009507|chloroplast(ISM)	chloroplast	F	GO:0003735|structural constituent of ribosome(ISS)	structural molecule activity	C	GO:0022627|cytosolic small ribosomal subunit(IDA)	other intracellular components	P	GO:0006412|translation(ISS)	other cellular processes	C	GO:0022627|cytosolic small ribosomal subunit(ISS)	ribosome	C	GO:0022627|cytosolic small ribosomal subunit(ISS)	other cytoplasmic components	C	GO:0022627|cytosolic small ribosomal subunit(IDA)	cytosol	C	GO:0022627|cytosolic small ribosomal subunit(IDA)	other cytoplasmic components	P	GO:0006412|translation(ISS)	other metabolic processes	C	GO:0022627|cytosolic small ribosomal subunit(IDA)	ribosome	P	GO:0006412|translation(ISS)	protein metabolism	C	GO:0022627|cytosolic small ribosomal subunit(ISS)	cytosol
AT1G14320	C	GO:0005774|vacuolar membrane(IDA)	other cytoplasmic components	P	GO:0071493|cellular response to UV-B(IMP)	other cellular processes	C	GO:0005730|nucleolus(IDA)	other intracellular components	C	GO:0022626|cytosolic ribosome(IDA)	ribosome	C	GO:0022626|cytosolic ribosome(IDA)	other intracellular components	C	GO:0022626|cytosolic ribosome(IDA)	ribosome	P	GO:0032502|developmental process(IMP)	other biological processes	P	GO:0001510|RNA methylation(RCA)	other cellular processes	C	GO:0022626|cytosolic ribosome(IDA)	ribosome	C	GO:0022625|cytosolic large ribosomal subunit(IDA)	ribosome	C	GO:0022625|cytosolic large ribosomal subunit(IDA)	other cytoplasmic components	C	GO:0005774|vacuolar membrane(IDA)	other intracellular components	C	GO:0005774|vacuolar membrane(IDA)	other membranes	C	GO:0005737|cytoplasm(ISM)	other cytoplasmic components	P	GO:0006412|translation(TAS)	other cellular processes	C	GO:0015934|large ribosomal subunit(ISS)	other cytoplasmic components	C
AT1G26910	C	GO:0005634|nucleus(IDA)	nucleus	F	GO:0003735|structural constituent of ribosome(ISS)	structural molecule activity	P	GO:0006412|translation(ISS)	other metabolic processes	C	GO:0009941|chloroplast envelope(IDA)	other cytoplasmic components	P	GO:0001510|RNA methylation(RCA)	other cellular processes	P	GO:0001510|RNA methylation(RCA)	other metabolic processes	P	GO:0006412|translation(ISS)	other cellular processes	C	GO:0009941|chloroplast envelope(IDA)	chloroplast	P	GO:0006412|translation(ISS)	protein metabolism	P	GO:0032502|developmental process(IMP)	other biological processes	C	GO:0009941|chloroplast envelope(IDA)	plastid	C	GO:0005840|ribosome(ISS)	ribosome	C	GO:0005737|cytoplasm(ISM)	other cytoplasmic components	C	GO:0005737|cytoplasm(IDA)	other cytoplasmic components	C	GO:0016020|membrane(IDA)	other membranes	P	GO:0032502|developmental process(IMP)	other biological processes	C
AT1G66580	C	GO:0005774|vacuolar membrane(IDA)	other membranes	C	GO:0022626|cytosolic ribosome(IDA)	cytosol	C	GO:0005773|vacuole(IDA)	other cytoplasmic components	C	GO:0022626|cytosolic ribosome(IDA)	ribosome	C	GO:0022625|cytosolic large ribosomal subunit(IDA)	other cytoplasmic components	P	GO:0032502|developmental process(IMP)	other biological processes	C	GO:0005773|vacuole(IDA)	other intracellular components	C	GO:0022626|cytosolic ribosome(IDA)	other cytoplasmic components	C	GO:0022626|cytosolic ribosome(IDA)	other intracellular components	C	GO:0022625|cytosolic large ribosomal subunit(IDA)	other intracellular components	C	GO:0005840|ribosome(IPI)	ribosome	C	GO:0005840|ribosome(ISS)	ribosome	C	GO:0005634|nucleus(IDA)	nucleus	C	GO:0005737|cytoplasm(ISM)	other cytoplasmic components	P	GO:0006412|translation(ISS)	protein metabolism	C	GO:0005774|vacuolar membrane(IDA)	other intracellular components	F
AT3G23020	C	GO:0009507|chloroplast(IDA)	chloroplast	C	GO:0005739|mitochondrion(ISM)	mitochondria	P	GO:0008150|biological_process(ND)	unknown biological processes
AT4G34310	No annotation
AT2G42710	C	GO:0009507|chloroplast(ISM)	chloroplast	P	GO:0006412|translation(ISS)	protein metabolism	P	GO:0006354|DNA-templated transcription, elongation(RCA)	transcription,DNA-dependent	C	GO:0015934|large ribosomal subunit(ISS)	other intracellular components	F	GO:0003735|structural constituent of ribosome(ISS)	structural molecule activity	P	GO:0006412|translation(ISS)	other metabolic processes	P	GO:0006412|translation(ISS)	other cellular processes	C	GO:0015934|large ribosomal subunit(ISS)	other cytoplasmic components	C	GO:0005840|ribosome(ISS)	ribosome	C	GO:0015934|large ribosomal subunit(ISS)	ribosome	P	GO:0006354|DNA-templated transcription, elongation(RCA)	other metabolic processes	P	GO:0006354|DNA-templated transcription, elongation(RCA)	other cellular processes
AT5G62530	P	GO:0010133|proline catabolic process to glutamate(IMP)	other metabolic processes	P	GO:0006560|proline metabolic process(TAS)	other cellular processes	C	GO:0005739|mitochondrion(ISM)	mitochondria	F	GO:0008270|zinc ion binding(IDA)	other binding	P	GO:0009651|response to salt stress(IEP)	response to stress	P	GO:0006560|proline metabolic process(TAS)	other metabolic processes	C	GO:0005739|mitochondrion(IDA)	mitochondria	F	GO:0004028|3-chloroallyl aldehyde dehydrogenase activity(ISS)	other enzyme activity	C	GO:0009507|chloroplast(IDA)	chloroplast	C	GO:0005739|mitochondrion(IDA)	mitochondria	P	GO:0009651|response to salt stress(IEP)	response to abiotic or biotic stimulus	P	GO:0072593|reactive oxygen species metabolic process(IMP)	other cellular processes	P	GO:0072593|reactive oxygen species metabolic process(IMP)	other metabolic processes	F	GO:0050897|cobalt ion binding(IDA)	other binding	F	GO:0003842|1-pyrroline-5-carboxylate dehydrogenase activity(IMP)	other enzyme activity	P	GO:0010133|proline catabolic process to glutamate(IMP)	other cellular processes	C
AT5G46460	P	GO:0008150|biological_process(ND)	unknown biological processes	C	GO:0005739|mitochondrion(ISM)	mitochondria
AT3G25060	C	GO:0005739|mitochondrion(ISM)	mitochondria	P	GO:0008150|biological_process(ND)	unknown biological processes
AT2G37320	P	GO:0008150|biological_process(ND)	unknown biological processes	F	GO:0003674|molecular_function(ND)	unknown molecular functions	C	GO:0005739|mitochondrion(ISM)	mitochondria
AT5G38730	C	GO:0005739|mitochondrion(ISM)	mitochondria	F	GO:0003674|molecular_function(ND)	unknown molecular functions	P	GO:0008150|biological_process(ND)	unknown biological processes
AT2G44070	F	GO:0003743|translation initiation factor activity(ISS)	DNA or RNA binding	F	GO:0005085|guanyl-nucleotide exchange factor activity(IBA)	other molecular functions	C	GO:0005851|eukaryotic translation initiation factor 2B complex(ISS)	other cytoplasmic components	F	GO:0005525|GTP binding(ISS)	nucleotide binding	P	GO:0006413|translational initiation(ISS)	protein metabolism	F	GO:0003743|translation initiation factor activity(IBA)	DNA or RNA binding	C	GO:0005851|eukaryotic translation initiation factor 2B complex(IBA)	other cytoplasmic components	C	GO:0005851|eukaryotic translation initiation factor 2B complex(IBA)	other intracellular components	P	GO:0045947|negative regulation of translational initiation(IBA)	other metabolic processes	P	GO:0050790|regulation of catalytic activity(IBA)	other metabolic processes	P	GO:0006413|translational initiation(ISS)	other metabolic processes	P	GO:0006413|translational initiation(ISS)	other cellular processes	P	GO:0045947|negative regulation of translational initiation(IBA)	other cellular processes	C	GO:0005851|eukaryotic translation initiation factor 2B complex(ISS)	other intracellular components	F	GO:0005525|GTP binding(ISS)	other binding	P	GO:0045947|negative regulation of translational initiation(IBA)	protein metabolism
AT2G20820	F	GO:0003674|molecular_function(ND)	unknown molecular functions	C	GO:0009507|chloroplast(ISM)	chloroplast	P	GO:0008150|biological_process(ND)	unknown biological processes	P	GO:0009853|photorespiration(RCA)	other metabolic processes	P	GO:0009853|photorespiration(RCA)	other cellular processes
AT2G20450	C	GO:0005737|cytoplasm(ISM)	other cytoplasmic components	C	GO:0005783|endoplasmic reticulum(IDA)	ER	P	GO:0006412|translation(ISS)	protein metabolism	C	GO:0005773|vacuole(IDA)	other intracellular components	C	GO:0005773|vacuole(IDA)	other cytoplasmic components	C	GO:0009506|plasmodesma(IDA)	other cellular components	C	GO:0022625|cytosolic large ribosomal subunit(IDA)	ribosome	P	GO:0001510|RNA methylation(RCA)	other cellular processes	P	GO:0006412|translation(ISS)	other metabolic processes	C	GO:0022625|cytosolic large ribosomal subunit(IDA)	cytosol	P	GO:0006412|translation(ISS)	other cellular processes	C	GO:0005783|endoplasmic reticulum(IDA)	ER	C	GO:0005840|ribosome(ISS)	ribosome	F	GO:0003735|structural constituent of ribosome(ISS)	structural molecule activity	C	GO:0022625|cytosolic large ribosomal subunit(IDA)	other cytoplasmic components	P	GO:0001510|RNA methylation(RCA)	other metabolic processes	P
AT5G57300	C	GO:0005739|mitochondrion(IDA)	mitochondria	C	GO:0005739|mitochondrion(ISM)	mitochondria	C	GO:0005739|mitochondrion(IDA)	mitochondria	C	GO:0005739|mitochondrion(ISM)	mitochondria	C	GO:0005739|mitochondrion(ISM)	mitochondria
AT2G44350	F	GO:0005524|ATP binding(IDA)	other binding	P	GO:0009060|aerobic respiration(RCA)	electron transport or energy pathways	C	GO:0005618|cell wall(IDA)	cell wall	C	GO:0005739|mitochondrion(IDA)	mitochondria	C	GO:0005739|mitochondrion(IDA)	mitochondria	C	GO:0005739|mitochondrion(IDA)	mitochondria	P	GO:0009060|aerobic respiration(RCA)	other cellular processes	C	GO:0005739|mitochondrion(ISM)	mitochondria	F	GO:0004108|citrate (Si)-synthase activity(IDA)	transferase activity	P	GO:0006099|tricarboxylic acid cycle(TAS)	electron transport or energy pathways	F	GO:0005524|ATP binding(IDA)	nucleotide binding	P	GO:0006099|tricarboxylic acid cycle(TAS)	other cellular processes	C	GO:0005739|mitochondrion(IDA)	mitochondria	F	GO:0005524|ATP binding(IDA)	other binding	P	GO:0046686|response to cadmium ion(IEP)	other biological processes	F	GO:0004108|citrate (Si)-synthase activity(ISS)	transferase activity	P
AT4G36420	C	GO:0015934|large ribosomal subunit(ISS)	ribosome	P	GO:0006412|translation(ISS)	protein metabolism	C	GO:0005739|mitochondrion(ISM)	mitochondria	C	GO:0015934|large ribosomal subunit(ISS)	other intracellular components	C	GO:0015934|large ribosomal subunit(ISS)	other cytoplasmic components	F	GO:0003735|structural constituent of ribosome(ISS)	structural molecule activity	P	GO:0006412|translation(ISS)	other metabolic processes	P	GO:0006412|translation(ISS)	other cellular processes
AT5G50930	C	GO:0005634|nucleus(ISM)	nucleus
AT5G66760	C	GO:0005749|mitochondrial respiratory chain complex II, succinate dehydrogenase complex (ubiquinone)(IDA)	other cytoplasmic components	C	GO:0005749|mitochondrial respiratory chain complex II, succinate dehydrogenase complex (ubiquinone)(IDA)	other intracellular components	F	GO:0005524|ATP binding(IDA)	other binding	C	GO:0005739|mitochondrion(IDA)	mitochondria	C	GO:0005749|mitochondrial respiratory chain complex II, succinate dehydrogenase complex (ubiquinone)(ISS)	other membranes	P	GO:0006121|mitochondrial electron transport, succinate to ubiquinone(TAS)	other cellular processes	F	GO:0050897|cobalt ion binding(IDA)	other binding	C	GO:0005749|mitochondrial respiratory chain complex II, succinate dehydrogenase complex (ubiquinone)(IDA)	other membranes	C	GO:0005749|mitochondrial respiratory chain complex II, succinate dehydrogenase complex (ubiquinone)(ISS)	mitochondria	P	GO:0006121|mitochondrial electron transport, succinate to ubiquinone(TAS)	electron transport or energy pathways	F	GO:0005524|ATP binding(IDA)	nucleotide binding	C	GO:0005739|mitochondrion(IDA)	mitochondria	C	GO:0005749|mitochondrial respiratory chain complex II, succinate dehydrogenase complex (ubiquinone)(ISS)	other cytoplasmic components	C	GO:0005739|mitochondrion(IDA)	mitochondria	C	GO:0005749|mitochondrial respiratory chain complex II, succinate dehydrogenase complex (ubiquinone)(IDA)	mitochondria	C	GO:0005739|mitochondrion(IDA)	mitochondria	C
AT1G63400	P	GO:0008150|biological_process(ND)	unknown biological processes	C	GO:0005739|mitochondrion(ISM)	mitochondria
AT2G28430	C	GO:0009507|chloroplast(ISM)	chloroplast	F	GO:0003674|molecular_function(ND)	unknown molecular functions	P	GO:0008150|biological_process(ND)	unknown biological processes	C	GO:0009536|plastid(IDA)	plastid
AT1G53760	C	GO:0005739|mitochondrion(IDA)	mitochondria	C	GO:0005739|mitochondrion(ISM)	mitochondria	C	GO:0005739|mitochondrion(IDA)	mitochondria	P	GO:0008150|biological_process(ND)	unknown biological processes	C	GO:0005739|mitochondrion(IDA)	mitochondria	C	GO:0016020|membrane(IDA)	other membranes	C	GO:0005774|vacuolar membrane(IDA)	other intracellular components	C	GO:0005774|vacuolar membrane(IDA)	other cytoplasmic components	C	GO:0005774|vacuolar membrane(IDA)	other membranes	F	GO:0003674|molecular_function(ND)	unknown molecular functions	C	GO:0009536|plastid(IDA)	plastid
AT1G56330	F	GO:0005525|GTP binding(ISS)	nucleotide binding	C	GO:0005829|cytosol(IDA)	cytosol	F	GO:0005525|GTP binding(ISS)	other binding	P	GO:0006888|ER to Golgi vesicle-mediated transport(TAS)	transport	C	GO:0019898|extrinsic component of membrane(IDA)	other membranes	C	GO:0005886|plasma membrane(IDA)	plasma membrane	C	GO:0005886|plasma membrane(IDA)	plasma membrane	F	GO:0005525|GTP binding(ISS)	other binding	P	GO:0007010|cytoskeleton organization(RCA)	other cellular processes	C	GO:0005829|cytosol(IDA)	cytosol	C	GO:0005783|endoplasmic reticulum(IDA)	ER	P	GO:0010498|proteasomal protein catabolic process(RCA)	other cellular processes	F	GO:0005515|protein binding(IPI)	protein binding	P	GO:0010498|proteasomal protein catabolic process(RCA)	other metabolic processes	P	GO:0007010|cytoskeleton organization(RCA)	cell organization and biogenesis	C	GO:0005783|endoplasmic reticulum(IDA)	ER	F
AT2G27775	F	GO:0003674|molecular_function(ND)	unknown molecular functions	C	GO:0005739|mitochondrion(ISM)	mitochondria	C	GO:0005739|mitochondrion(ISM)	mitochondria	P	GO:0008150|biological_process(ND)	unknown biological processes
AT3G21465	F	GO:0003674|molecular_function(ND)	unknown molecular functions	C	GO:0005739|mitochondrion(ISM)	mitochondria	P	GO:0008150|biological_process(ND)	unknown biological processes
AT1G09680	C	GO:0005739|mitochondrion(ISM)	mitochondria	P	GO:0008150|biological_process(ND)	unknown biological processes	C	GO:0005739|mitochondrion(IDA)	mitochondria	F	GO:0003674|molecular_function(ND)	unknown molecular functions
AT2G18400	C	GO:0015934|large ribosomal subunit(ISS)	ribosome	F	GO:0003735|structural constituent of ribosome(ISS)	structural molecule activity	P	GO:0006412|translation(ISS)	other cellular processes	C	GO:0015934|large ribosomal subunit(ISS)	other intracellular components	P	GO:0006354|DNA-templated transcription, elongation(RCA)	other cellular processes	C	GO:0015934|large ribosomal subunit(ISS)	other cytoplasmic components	P	GO:0006412|translation(ISS)	other metabolic processes	P	GO:0006354|DNA-templated transcription, elongation(RCA)	other metabolic processes	P	GO:0006412|translation(ISS)	protein metabolism	P	GO:0006354|DNA-templated transcription, elongation(RCA)	transcription,DNA-dependent
AT5G66360	C	GO:0005739|mitochondrion(IDA)	mitochondria	P	GO:0000154|rRNA modification(IGI)	other cellular processes	P	GO:0046085|adenosine metabolic process(IMP)	other metabolic processes	C	GO:0005737|cytoplasm(ISM)	other cytoplasmic components	F	GO:0000179|rRNA (adenine-N6,N6-)-dimethyltransferase activity(ISS)	transferase activity	P	GO:0000154|rRNA modification(ISS)	other cellular processes	F	GO:0008649|rRNA methyltransferase activity(ISS)	transferase activity	F	GO:0000179|rRNA (adenine-N6,N6-)-dimethyltransferase activity(IGI)	transferase activity	P	GO:0000154|rRNA modification(ISS)	other metabolic processes	P	GO:0000154|rRNA modification(IGI)	other metabolic processes	P	GO:0046085|adenosine metabolic process(IMP)	other cellular processes	C	GO:0005737|cytoplasm(ISM)	other cytoplasmic components
AT5G15320	P	GO:0008150|biological_process(ND)	unknown biological processes	C	GO:0009507|chloroplast(ISM)	chloroplast	C	GO:0009507|chloroplast(ISM)	chloroplast	F	GO:0003674|molecular_function(ND)	unknown molecular functions
ATMG00690	C	GO:0005739|mitochondrion(ISM)	mitochondria
AT3G52200	C	GO:0005739|mitochondrion(IDA)	mitochondria	F	GO:0005524|ATP binding(IDA)	nucleotide binding	F	GO:0004742|dihydrolipoyllysine-residue acetyltransferase activity(ISS)	transferase activity	P	GO:0009749|response to glucose(RCA)	other biological processes	C	GO:0005739|mitochondrion(IDA)	mitochondria	P	GO:0010359|regulation of anion channel activity(RCA)	other cellular processes	P	GO:0009750|response to fructose(RCA)	other biological processes	C	GO:0005739|mitochondrion(IDA)	mitochondria	C	GO:0005739|mitochondrion(ISM)	mitochondria	C	GO:0005739|mitochondrion(IDA)	mitochondria	F	GO:0005524|ATP binding(IDA)	other binding	P	GO:0010359|regulation of anion channel activity(RCA)	transport	C	GO:0005739|mitochondrion(IDA)	mitochondria	C	GO:0005739|mitochondrion(ISM)	mitochondria	C	GO:0005739|mitochondrion(IDA)	mitochondria	P	GO:0009744|response to sucrose(RCA)	other biological processes
AT5G27110	C	GO:0005739|mitochondrion(ISM)	mitochondria	P	GO:0008150|biological_process(ND)	unknown biological processes
AT4G08940	C	GO:0009507|chloroplast(ISM)	chloroplast	P	GO:0015824|proline transport(RCA)	transport	P	GO:0006979|response to oxidative stress(IMP)	response to stress
AT3G24000	C	GO:0005739|mitochondrion(ISM)	mitochondria	P	GO:0008150|biological_process(ND)	unknown biological processes
AT1G11900	P	GO:0008150|biological_process(ND)	unknown biological processes	C	GO:0005739|mitochondrion(ISM)	mitochondria
AT1G14980	P	GO:0009408|response to heat(RCA)	response to abiotic or biotic stimulus	P	GO:0006457|protein folding(RCA)	other cellular processes	C	GO:0005739|mitochondrion(IDA)	mitochondria	P	GO:0034976|response to endoplasmic reticulum stress(RCA)	response to stress	P	GO:0034976|response to endoplasmic reticulum stress(RCA)	other cellular processes	F	GO:0005507|copper ion binding(IDA)	other binding	P	GO:0009644|response to high light intensity(RCA)	response to abiotic or biotic stimulus	P	GO:0009408|response to heat(IEP)	response to abiotic or biotic stimulus	P	GO:0042542|response to hydrogen peroxide(RCA)	response to stress	C	GO:0005739|mitochondrion(IDA)	mitochondria	P	GO:0009408|response to heat(IEP)	response to stress	C	GO:0005739|mitochondrion(IDA)	mitochondria	P	GO:0006457|protein folding(RCA)	protein metabolism	P	GO:0006457|protein folding(RCA)	other metabolic processes	C	GO:0005739|mitochondrion(IDA)	mitochondria	C	GO:0005739|mitochondrion(IDA)	mitochondria	F
AT1G28690	P	GO:0008150|biological_process(ND)	unknown biological processes	C	GO:0005739|mitochondrion(ISM)	mitochondria
AT1G14990	P	GO:0008150|biological_process(ND)	unknown biological processes	F	GO:0003674|molecular_function(ND)	unknown molecular functions
AT5G37670	P	GO:0009408|response to heat(RCA)	response to abiotic or biotic stimulus	F	GO:0003674|molecular_function(ND)	unknown molecular functions	P	GO:0006457|protein folding(IGI)	other cellular processes	P	GO:0009408|response to heat(ISS)	response to abiotic or biotic stimulus	P	GO:0009408|response to heat(IEP)	response to stress	P	GO:0009644|response to high light intensity(RCA)	response to abiotic or biotic stimulus	P	GO:0009408|response to heat(IEP)	response to abiotic or biotic stimulus	P	GO:0006457|protein folding(RCA)	other metabolic processes	P	GO:0009408|response to heat(RCA)	response to stress	C	GO:0005782|peroxisomal matrix(IDA)	other cytoplasmic components	C	GO:0005782|peroxisomal matrix(IDA)	other intracellular components	P	GO:0006457|protein folding(IGI)	other metabolic processes	P	GO:0042542|response to hydrogen peroxide(RCA)	response to stress	P	GO:0000302|response to reactive oxygen species(IEP)	response to stress	P	GO:0009408|response to heat(ISS)	response to stress	P	GO:0006457|protein folding(RCA)	other cellular processes	P
AT1G20230	C	GO:0005575|cellular_component(ND)	unknown cellular components	P	GO:0008150|biological_process(ND)	unknown biological processes
AT1G20300	C	GO:0005739|mitochondrion(ISM)	mitochondria	C	GO:0005739|mitochondrion(IDA)	mitochondria
AT5G40810	F	GO:0005515|protein binding(IPI)	protein binding	C	GO:0005750|mitochondrial respiratory chain complex III(IDA)	other cytoplasmic components	P	GO:0006511|ubiquitin-dependent protein catabolic process(RCA)	protein metabolism	C	GO:0016020|membrane(IDA)	other membranes	C	GO:0005739|mitochondrion(IDA)	mitochondria	C	GO:0005750|mitochondrial respiratory chain complex III(IDA)	other intracellular components	C	GO:0005750|mitochondrial respiratory chain complex III(IDA)	other membranes	F	GO:0045153|electron transporter, transferring electrons within CoQH2-cytochrome c reductase complex activity(ISS)	other molecular functions	C	GO:0005746|mitochondrial respiratory chain(ISS)	other cytoplasmic components	C	GO:0005773|vacuole(IDA)	other cytoplasmic components	C	GO:0005746|mitochondrial respiratory chain(ISS)	other membranes	P	GO:0009853|photorespiration(RCA)	other cellular processes	C	GO:0005773|vacuole(IDA)	other intracellular components	C	GO:0005739|mitochondrion(ISM)	mitochondria	C	GO:0005750|mitochondrial respiratory chain complex III(IDA)	mitochondria	P	GO:0009853|photorespiration(RCA)	other metabolic processes	C
AT5G41170	C	GO:0005739|mitochondrion(ISM)	mitochondria	P	GO:0008150|biological_process(ND)	unknown biological processes
AT3G15590	F	GO:0003677|DNA binding(ISS)	DNA or RNA binding	C	GO:0005739|mitochondrion(ISM)	mitochondria	C	GO:0005739|mitochondrion(IDA)	mitochondria
AT4G26210	P	GO:0006626|protein targeting to mitochondrion(RCA)	cell organization and biogenesis	P	GO:0006626|protein targeting to mitochondrion(RCA)	other cellular processes	P	GO:0015992|proton transport(ISS)	transport	P	GO:0006626|protein targeting to mitochondrion(RCA)	transport	C	GO:0009536|plastid(IDA)	plastid
AT3G09700	P	GO:0006333|chromatin assembly or disassembly(RCA)	cell organization and biogenesis	P	GO:0006457|protein folding(ISS)	other metabolic processes	P	GO:0006457|protein folding(ISS)	other cellular processes	P	GO:0006457|protein folding(ISS)	protein metabolism	P	GO:0006333|chromatin assembly or disassembly(RCA)	other cellular processes
AT4G17616	P	GO:0008150|biological_process(ND)	unknown biological processes	C	GO:0005739|mitochondrion(ISM)	mitochondria	F	GO:0003674|molecular_function(ND)	unknown molecular functions
AT5G47455	P	GO:0008150|biological_process(ND)	unknown biological processes	C	GO:0005739|mitochondrion(IDA)	mitochondria	C	GO:0005886|plasma membrane(ISM)	plasma membrane	C	GO:0005886|plasma membrane(ISM)	plasma membrane	F	GO:0003674|molecular_function(ND)	unknown molecular functions	C	GO:0005886|plasma membrane(ISM)	plasma membrane	C	GO:0005886|plasma membrane(ISM)	plasma membrane	C	GO:0005739|mitochondrion(ISM)	mitochondria
AT5G13230	P	GO:0008150|biological_process(ND)	unknown biological processes	C	GO:0005739|mitochondrion(ISM)	mitochondria
AT2G31060	F	GO:0005525|GTP binding(ISS)	other binding	P	GO:0006626|protein targeting to mitochondrion(RCA)	transport	P	GO:0006626|protein targeting to mitochondrion(RCA)	other cellular processes	C	GO:0009507|chloroplast(ISM)	chloroplast	C	GO:0009507|chloroplast(ISM)	chloroplast	C	GO:0005739|mitochondrion(IDA)	mitochondria	F	GO:0005525|GTP binding(ISS)	nucleotide binding	C	GO:0005886|plasma membrane(ISM)	plasma membrane	P	GO:0006626|protein targeting to mitochondrion(RCA)	cell organization and biogenesis	F	GO:0003746|translation elongation factor activity(ISS)	DNA or RNA binding
AT2G21195	C	GO:0005739|mitochondrion(ISM)	mitochondria	C	GO:0005739|mitochondrion(ISM)	mitochondria	P	GO:0006979|response to oxidative stress(IMP)	response to stress	F	GO:0003674|molecular_function(ND)	unknown molecular functions	C	GO:0005739|mitochondrion(ISM)	mitochondria
AT2G27800	C	GO:0005739|mitochondrion(ISM)	mitochondria
AT3G51010	P	GO:0008150|biological_process(ND)	unknown biological processes	C	GO:0009536|plastid(IDA)	plastid	C	GO:0005739|mitochondrion(IDA)	mitochondria	C	GO:0009507|chloroplast(ISM)	chloroplast	C	GO:0005739|mitochondrion(IDA)	mitochondria	F	GO:0003674|molecular_function(ND)	unknown molecular functions
AT1G63230	P	GO:0008150|biological_process(ND)	unknown biological processes	C	GO:0005739|mitochondrion(ISM)	mitochondria
AT1G07590	P	GO:0046686|response to cadmium ion(IEP)	other biological processes	C	GO:0005739|mitochondrion(ISM)	mitochondria
AT1G49410	C	GO:0005739|mitochondrion(ISM)	mitochondria	C	GO:0005739|mitochondrion(IDA)	mitochondria	F	GO:0003674|molecular_function(ND)	unknown molecular functions
AT1G23100	C	GO:0005739|mitochondrion(IDA)	mitochondria	C	GO:0005739|mitochondrion(IDA)	mitochondria	C	GO:0005737|cytoplasm(ISM)	other cytoplasmic components
AT1G26900	C	GO:0005739|mitochondrion(ISM)	mitochondria
AT5G14200	C	GO:0009507|chloroplast(IDA)	chloroplast	C	GO:0009570|chloroplast stroma(IDA)	chloroplast	P	GO:0008152|metabolic process(ISS)	other metabolic processes	P	GO:0009098|leucine biosynthetic process(IGI)	other metabolic processes	C	GO:0009507|chloroplast(ISM)	chloroplast	P	GO:0009651|response to salt stress(IEP)	response to stress	P	GO:0009651|response to salt stress(IEP)	response to abiotic or biotic stimulus	C	GO:0009570|chloroplast stroma(IDA)	other cytoplasmic components	C	GO:0009570|chloroplast stroma(IDA)	other intracellular components	C	GO:0009507|chloroplast(ISM)	chloroplast	C	GO:0009570|chloroplast stroma(IDA)	other cytoplasmic components	C	GO:0009570|chloroplast stroma(IDA)	other cytoplasmic components	C	GO:0009570|chloroplast stroma(IDA)	plastid	C	GO:0009536|plastid(ISS)	plastid	P	GO:0019761|glucosinolate biosynthetic process(IMP)	other cellular processes	P	GO:0009651|response to salt stress(IEP)	response to abiotic or biotic stimulus	C
AT1G06710	C	GO:0005739|mitochondrion(ISM)	mitochondria
AT2G19280	C	GO:0005739|mitochondrion(ISM)	mitochondria	C	GO:0005739|mitochondrion(ISM)	mitochondria	P	GO:0008150|biological_process(ND)	unknown biological processes
AT5G57230	P	GO:0008150|biological_process(ND)	unknown biological processes	C	GO:0005739|mitochondrion(ISM)	mitochondria	F	GO:0003674|molecular_function(ND)	unknown molecular functions
AT3G61360	C	GO:0005739|mitochondrion(ISM)	mitochondria	P	GO:0008150|biological_process(ND)	unknown biological processes
AT4G12240	C	GO:0005739|mitochondrion(IDA)	mitochondria	C	GO:0009507|chloroplast(ISM)	chloroplast	P	GO:0006355|regulation of transcription, DNA-templated(TAS)	other metabolic processes	F	GO:0003676|nucleic acid binding(ISS)	nucleic acid binding	F	GO:0008270|zinc ion binding(ISS)	other binding	F	GO:0003700|sequence-specific DNA binding transcription factor activity(ISS)	transcription factor activity	P	GO:0006355|regulation of transcription, DNA-templated(TAS)	other cellular processes	P	GO:0006355|regulation of transcription, DNA-templated(TAS)	transcription,DNA-dependent
AT5G46100	F	GO:0003674|molecular_function(ND)	unknown molecular functions	P	GO:0008150|biological_process(ND)	unknown biological processes	C	GO:0005739|mitochondrion(ISM)	mitochondria
AT1G31180	F	GO:0003862|3-isopropylmalate dehydrogenase activity(ISS)	other enzyme activity	P	GO:0009651|response to salt stress(IEP)	response to abiotic or biotic stimulus	C	GO:0009507|chloroplast(IDA)	chloroplast	P	GO:0009098|leucine biosynthetic process(IGI)	other cellular processes	C	GO:0005739|mitochondrion(ISM)	mitochondria	C	GO:0009570|chloroplast stroma(IDA)	chloroplast	C	GO:0009536|plastid(IDA)	plastid	C	GO:0009570|chloroplast stroma(IDA)	other cytoplasmic components	C	GO:0009570|chloroplast stroma(IDA)	other cytoplasmic components	C	GO:0009536|plastid(ISS)	plastid	C	GO:0009579|thylakoid(IDA)	other intracellular components	C	GO:0009570|chloroplast stroma(IDA)	chloroplast	C	GO:0009570|chloroplast stroma(IDA)	plastid	C	GO:0009570|chloroplast stroma(IDA)	plastid	C	GO:0009570|chloroplast stroma(IDA)	other intracellular components	C	GO:0009570|chloroplast stroma(IDA)	chloroplast	C
AT3G47840	P	GO:0008150|biological_process(ND)	unknown biological processes	C	GO:0005739|mitochondrion(ISM)	mitochondria
AT2G17140	C	GO:0005739|mitochondrion(ISM)	mitochondria
AT1G18630	P	GO:0009651|response to salt stress(IEP)	response to abiotic or biotic stimulus	C	GO:0005802|trans-Golgi network(IDA)	other intracellular components	F	GO:0003723|RNA binding(ISS)	DNA or RNA binding	C	GO:0005794|Golgi apparatus(IDA)	Golgi apparatus	C	GO:0005768|endosome(IDA)	other cytoplasmic components	C	GO:0005768|endosome(IDA)	other intracellular components	C	GO:0005802|trans-Golgi network(IDA)	other cytoplasmic components	C	GO:0005802|trans-Golgi network(IDA)	Golgi apparatus	P	GO:0009651|response to salt stress(IEP)	response to stress	C	GO:0005634|nucleus(ISM)	nucleus
AT1G69210	F	GO:0003674|molecular_function(ND)	unknown molecular functions	P	GO:0008150|biological_process(ND)	unknown biological processes	P	GO:0009560|embryo sac egg cell differentiation(RCA)	developmental processes	P	GO:0009560|embryo sac egg cell differentiation(RCA)	other cellular processes	C	GO:0005575|cellular_component(ND)	unknown cellular components
AT4G05450	P	GO:0019243|methylglyoxal catabolic process to D-lactate(RCA)	other metabolic processes	C	GO:0005739|mitochondrion(ISM)	mitochondria	P	GO:0019243|methylglyoxal catabolic process to D-lactate(RCA)	other cellular processes	P	GO:0048868|pollen tube development(IMP)	other biological processes	F	GO:0009055|electron carrier activity(ISS)	other molecular functions
AT2G29560	C	GO:0005829|cytosol(IDA)	cytosol	C	GO:0005634|nucleus(IDA)	nucleus	F	GO:0004634|phosphopyruvate hydratase activity(ISS)	other enzyme activity	C	GO:0005737|cytoplasm(IDA)	other cytoplasmic components
AT3G51320	P	GO:0008150|biological_process(ND)	unknown biological processes	C	GO:0005739|mitochondrion(ISM)	mitochondria
AT4G26310	C	GO:0009507|chloroplast(ISM)	chloroplast	F	GO:0003746|translation elongation factor activity(ISS)	DNA or RNA binding	P	GO:0006414|translational elongation(ISS)	protein metabolism	C	GO:0009507|chloroplast(ISM)	chloroplast	P	GO:0006414|translational elongation(ISS)	other metabolic processes	P	GO:0006414|translational elongation(ISS)	other cellular processes
AT5G45590	C	GO:0005739|mitochondrion(ISM)	mitochondria
AT3G08690	P	GO:0042023|DNA endoreduplication(RCA)	other metabolic processes	P	GO:0043161|proteasome-mediated ubiquitin-dependent protein catabolic process(RCA)	other cellular processes	P	GO:0006511|ubiquitin-dependent protein catabolic process(TAS)	other metabolic processes	P	GO:0006511|ubiquitin-dependent protein catabolic process(TAS)	protein metabolism	P	GO:0051788|response to misfolded protein(RCA)	response to stress	P	GO:0006301|postreplication repair(RCA)	other cellular processes	P	GO:0006301|postreplication repair(RCA)	other metabolic processes	F	GO:0004842|ubiquitin-protein transferase activity(IDA)	transferase activity	P	GO:0051510|regulation of unidimensional cell growth(RCA)	cell organization and biogenesis	P	GO:0006511|ubiquitin-dependent protein catabolic process(RCA)	other metabolic processes	P	GO:0006511|ubiquitin-dependent protein catabolic process(IDA)	protein metabolism	P	GO:0043248|proteasome assembly(RCA)	cell organization and biogenesis	P	GO:0009407|toxin catabolic process(RCA)	other metabolic processes	F	GO:0004842|ubiquitin-protein transferase activity(ISS)	transferase activity	P	GO:0006511|ubiquitin-dependent protein catabolic process(IDA)	other metabolic processes	P	GO:0006511|ubiquitin-dependent protein catabolic process(IDA)	other cellular processes	P
AT1G49400	C	GO:0022627|cytosolic small ribosomal subunit(ISS)	cytosol	P	GO:0006354|DNA-templated transcription, elongation(RCA)	transcription,DNA-dependent	P	GO:0006354|DNA-templated transcription, elongation(RCA)	other metabolic processes	C	GO:0022627|cytosolic small ribosomal subunit(ISS)	other intracellular components	P	GO:0009793|embryo development ending in seed dormancy(NAS)	developmental processes	C	GO:0022627|cytosolic small ribosomal subunit(ISS)	ribosome	P	GO:0006412|translation(ISS)	protein metabolism	C	GO:0022627|cytosolic small ribosomal subunit(ISS)	other cytoplasmic components	P	GO:0006412|translation(ISS)	other cellular processes	P	GO:0006412|translation(ISS)	other metabolic processes	P	GO:0006354|DNA-templated transcription, elongation(RCA)	other cellular processes	F	GO:0003735|structural constituent of ribosome(ISS)	structural molecule activity
AT1G66345	C	GO:0005739|mitochondrion(ISM)	mitochondria	P	GO:0008150|biological_process(ND)	unknown biological processes	F	GO:0003674|molecular_function(ND)	unknown molecular functions
AT4G02080	F	GO:0005525|GTP binding(ISS)	other binding	C	GO:0005886|plasma membrane(IDA)	plasma membrane	P	GO:0009853|photorespiration(RCA)	other metabolic processes	P	GO:0006511|ubiquitin-dependent protein catabolic process(RCA)	protein metabolism	P	GO:0080129|proteasome core complex assembly(RCA)	cell organization and biogenesis	P	GO:0009853|photorespiration(RCA)	other cellular processes	P	GO:0046686|response to cadmium ion(RCA)	other biological processes	P	GO:0051788|response to misfolded protein(RCA)	response to stress	P	GO:0006511|ubiquitin-dependent protein catabolic process(RCA)	other cellular processes	P	GO:0007033|vacuole organization(RCA)	other cellular processes	P	GO:0007030|Golgi organization(RCA)	other cellular processes	C	GO:0005886|plasma membrane(IDA)	plasma membrane	F	GO:0005525|GTP binding(ISS)	nucleotide binding	P	GO:0006096|glycolytic process(RCA)	electron transport or energy pathways	P	GO:0007030|Golgi organization(RCA)	cell organization and biogenesis	P	GO:0006623|protein targeting to vacuole(RCA)	transport	P
AT3G45300	C	GO:0005739|mitochondrion(IDA)	mitochondria	P	GO:0006552|leucine catabolic process(IDA)	other cellular processes	P	GO:0009083|branched-chain amino acid catabolic process(IMP)	other metabolic processes	F	GO:0008470|isovaleryl-CoA dehydrogenase activity(ISS)	other enzyme activity	C	GO:0005759|mitochondrial matrix(IDA)	mitochondria	F	GO:0008470|isovaleryl-CoA dehydrogenase activity(IDA)	other enzyme activity	C	GO:0005739|mitochondrion(IDA)	mitochondria	P	GO:0006552|leucine catabolic process(IDA)	other metabolic processes	C	GO:0005759|mitochondrial matrix(IDA)	other intracellular components	C	GO:0005739|mitochondrion(IDA)	mitochondria	P	GO:0009083|branched-chain amino acid catabolic process(IMP)	other cellular processes	C	GO:0005739|mitochondrion(ISM)	mitochondria	F	GO:0005524|ATP binding(IDA)	nucleotide binding	P	GO:0009750|response to fructose(RCA)	other biological processes	C	GO:0005739|mitochondrion(IDA)	mitochondria	C	GO:0005759|mitochondrial matrix(IDA)	other cytoplasmic components	P
AT5G46180	P	GO:0006635|fatty acid beta-oxidation(RCA)	other metabolic processes	P	GO:0007031|peroxisome organization(RCA)	cell organization and biogenesis	P	GO:0009651|response to salt stress(IDA)	response to abiotic or biotic stimulus	P	GO:0010260|organ senescence(RCA)	developmental processes	F	GO:0004587|ornithine-oxo-acid transaminase activity(IDA)	transferase activity	C	GO:0005739|mitochondrion(IDA)	mitochondria	P	GO:0009651|response to salt stress(IDA)	response to stress	P	GO:0006561|proline biosynthetic process(IDA)	other cellular processes	F	GO:0004587|ornithine-oxo-acid transaminase activity(ISS)	transferase activity	F	GO:0004587|ornithine-oxo-acid transaminase activity(IMP)	transferase activity	P	GO:0019544|arginine catabolic process to glutamate(IMP)	other cellular processes	P	GO:0009626|plant-type hypersensitive response(TAS)	response to stress	P	GO:0042538|hyperosmotic salinity response(IDA)	response to abiotic or biotic stimulus	F	GO:0008270|zinc ion binding(IDA)	other binding	P	GO:0006635|fatty acid beta-oxidation(RCA)	other cellular processes	C	GO:0005737|cytoplasm(ISM)	other cytoplasmic components	P
AT2G39795	P	GO:0010388|cullin deneddylation(RCA)	protein metabolism	P	GO:0034968|histone lysine methylation(RCA)	other metabolic processes	P	GO:0009640|photomorphogenesis(RCA)	developmental processes	P	GO:0034968|histone lysine methylation(RCA)	cell organization and biogenesis	C	GO:0005759|mitochondrial matrix(ISS)	other intracellular components	P	GO:0009220|pyrimidine ribonucleotide biosynthetic process(RCA)	other metabolic processes	P	GO:0010388|cullin deneddylation(RCA)	other cellular processes	P	GO:0034968|histone lysine methylation(RCA)	other cellular processes	C	GO:0005739|mitochondrion(IDA)	mitochondria	C	GO:0005759|mitochondrial matrix(ISS)	other cytoplasmic components	P	GO:0009909|regulation of flower development(RCA)	developmental processes	P	GO:0009220|pyrimidine ribonucleotide biosynthetic process(RCA)	other cellular processes	C	GO:0005739|mitochondrion(IDA)	mitochondria	C	GO:0005739|mitochondrion(ISM)	mitochondria	P	GO:0009640|photomorphogenesis(RCA)	response to abiotic or biotic stimulus	C	GO:0005759|mitochondrial matrix(ISS)	mitochondria	P
AT5G18820	C	GO:0009507|chloroplast(ISM)	chloroplast	P	GO:0009793|embryo development ending in seed dormancy(NAS)	developmental processes	P	GO:0034976|response to endoplasmic reticulum stress(RCA)	response to stress	P	GO:0034976|response to endoplasmic reticulum stress(RCA)	other cellular processes	P	GO:0042542|response to hydrogen peroxide(RCA)	response to stress	P	GO:0009220|pyrimidine ribonucleotide biosynthetic process(RCA)	other metabolic processes	P	GO:0009220|pyrimidine ribonucleotide biosynthetic process(RCA)	other cellular processes	P	GO:0006457|protein folding(RCA)	protein metabolism	P	GO:0006457|protein folding(RCA)	other cellular processes	P	GO:0009408|response to heat(RCA)	response to abiotic or biotic stimulus	P	GO:0009408|response to heat(RCA)	response to stress	P	GO:0009644|response to high light intensity(RCA)	response to abiotic or biotic stimulus	P	GO:0006457|protein folding(RCA)	other metabolic processes
AT5G59240	C	GO:0005840|ribosome(ISS)	ribosome	C	GO:0022627|cytosolic small ribosomal subunit(ISS)	other cytoplasmic components	C	GO:0022626|cytosolic ribosome(IDA)	other cytoplasmic components	P	GO:0042254|ribosome biogenesis(ISS)	other biological processes	C	GO:0022626|cytosolic ribosome(IDA)	other intracellular components	P	GO:0006414|translational elongation(IBA)	other metabolic processes	C	GO:0022626|cytosolic ribosome(IDA)	other cytoplasmic components	C	GO:0022626|cytosolic ribosome(IDA)	ribosome	P	GO:0006412|translation(ISS)	other metabolic processes	P	GO:0006412|translation(ISS)	other cellular processes	C	GO:0022626|cytosolic ribosome(IDA)	ribosome	P	GO:0009165|nucleotide biosynthetic process(RCA)	other cellular processes	C	GO:0022627|cytosolic small ribosomal subunit(ISS)	ribosome	C	GO:0022626|cytosolic ribosome(IDA)	other intracellular components	C	GO:0022627|cytosolic small ribosomal subunit(IDA)	other cytoplasmic components	P	GO:0009165|nucleotide biosynthetic process(RCA)	other metabolic processes	C
AT3G02090	C	GO:0005774|vacuolar membrane(IDA)	other membranes	C	GO:0005739|mitochondrion(IDA)	mitochondria	F	GO:0008270|zinc ion binding(IDA)	other binding	C	GO:0005743|mitochondrial inner membrane(IDA)	other membranes	C	GO:0005750|mitochondrial respiratory chain complex III(IDA)	mitochondria	P	GO:0006511|ubiquitin-dependent protein catabolic process(RCA)	protein metabolism	C	GO:0005743|mitochondrial inner membrane(IDA)	other cytoplasmic components	C	GO:0005730|nucleolus(IDA)	nucleus	C	GO:0009507|chloroplast(IDA)	chloroplast	P	GO:0006511|ubiquitin-dependent protein catabolic process(RCA)	other cellular processes	C	GO:0005739|mitochondrion(ISM)	mitochondria	P	GO:0009853|photorespiration(RCA)	other metabolic processes	C	GO:0005743|mitochondrial inner membrane(IDA)	mitochondria	P	GO:0051788|response to misfolded protein(RCA)	response to stress	F	GO:0004222|metalloendopeptidase activity(ISS)	hydrolase activity	C	GO:0005618|cell wall(IDA)	cell wall	P
AT5G67380	P	GO:0006281|DNA repair(IDA)	other cellular processes	P	GO:0007623|circadian rhythm(IGI)	other biological processes	P	GO:0010225|response to UV-C(IMP)	response to abiotic or biotic stimulus	P	GO:2001020|regulation of response to DNA damage stimulus(IEP)	other cellular processes	P	GO:0006281|DNA repair(IDA)	DNA or RNA metabolism	F	GO:0016301|kinase activity(ISS)	kinase activity	P	GO:0006325|chromatin organization(IEP)	cell organization and biogenesis	P	GO:0048573|photoperiodism, flowering(RCA)	developmental processes	P	GO:0006281|DNA repair(IDA)	other metabolic processes	P	GO:0006325|chromatin organization(IEP)	other cellular processes	P	GO:0006325|chromatin organization(IDA)	other cellular processes	P	GO:2001020|regulation of response to DNA damage stimulus(IEP)	response to stress	P	GO:0006281|DNA repair(IDA)	response to stress	P	GO:0010332|response to gamma radiation(IMP)	response to abiotic or biotic stimulus	P	GO:0006325|chromatin organization(IDA)	cell organization and biogenesis	F	GO:0016301|kinase activity(IDA)	kinase activity	P
AT4G39300	F	GO:0003674|molecular_function(ND)	unknown molecular functions	P	GO:0008150|biological_process(ND)	unknown biological processes
AT5G03030	P	GO:0015824|proline transport(RCA)	transport	P	GO:0006457|protein folding(ISS)	other metabolic processes	P	GO:0006457|protein folding(ISS)	other cellular processes	P	GO:0006457|protein folding(ISS)	protein metabolism
AT2G17525	P	GO:0008150|biological_process(ND)	unknown biological processes	C	GO:0005739|mitochondrion(ISM)	mitochondria
AT3G21530	P	GO:0008150|biological_process(ND)	unknown biological processes	F	GO:0016787|hydrolase activity(ISS)	hydrolase activity
AT5G67490	P	GO:0008150|biological_process(ND)	unknown biological processes	F	GO:0003674|molecular_function(ND)	unknown molecular functions
AT1G52620	P	GO:0008150|biological_process(ND)	unknown biological processes	C	GO:0005739|mitochondrion(ISM)	mitochondria	F	GO:0003674|molecular_function(ND)	unknown molecular functions
AT3G45800	C	GO:0005575|cellular_component(ND)	unknown cellular components	P	GO:0008150|biological_process(ND)	unknown biological processes	F	GO:0003674|molecular_function(ND)	unknown molecular functions
AT5G39840	F	GO:0004004|ATP-dependent RNA helicase activity(ISS)	hydrolase activity	P	GO:0009220|pyrimidine ribonucleotide biosynthetic process(RCA)	other metabolic processes	C	GO:0005739|mitochondrion(ISS)	mitochondria	C	GO:0005739|mitochondrion(ISM)	mitochondria	P	GO:0009220|pyrimidine ribonucleotide biosynthetic process(RCA)	other cellular processes
AT3G07770	F	GO:0005524|ATP binding(IDA)	nucleotide binding	C	GO:0005739|mitochondrion(IDA)	mitochondria	F	GO:0005524|ATP binding(ISS)	nucleotide binding	C	GO:0009507|chloroplast(ISM)	chloroplast	C	GO:0005739|mitochondrion(IDA)	mitochondria	P	GO:0006457|protein folding(ISS)	other metabolic processes	P	GO:0006457|protein folding(ISS)	other cellular processes	C	GO:0005739|mitochondrion(IDA)	mitochondria	F	GO:0005524|ATP binding(IDA)	other binding	C	GO:0009570|chloroplast stroma(IDA)	other cytoplasmic components	C	GO:0009570|chloroplast stroma(IDA)	other intracellular components	C	GO:0005739|mitochondrion(IDA)	mitochondria	F	GO:0005524|ATP binding(ISS)	other binding	P	GO:0006457|protein folding(ISS)	protein metabolism	C	GO:0005618|cell wall(IDA)	cell wall	C	GO:0009570|chloroplast stroma(IDA)	chloroplast	C
AT5G27850	F	GO:0003735|structural constituent of ribosome(ISS)	structural molecule activity	C	GO:0016020|membrane(IDA)	other membranes	C	GO:0022626|cytosolic ribosome(IDA)	ribosome	C	GO:0022625|cytosolic large ribosomal subunit(IDA)	other intracellular components	C	GO:0022626|cytosolic ribosome(IDA)	other cytoplasmic components	C	GO:0009506|plasmodesma(IDA)	other cellular components	C	GO:0022626|cytosolic ribosome(IDA)	other intracellular components	C	GO:0022625|cytosolic large ribosomal subunit(IDA)	other cytoplasmic components	C	GO:0022626|cytosolic ribosome(IDA)	ribosome	C	GO:0022626|cytosolic ribosome(IDA)	cytosol	C	GO:0005773|vacuole(IDA)	other intracellular components	C	GO:0015934|large ribosomal subunit(ISS)	other intracellular components	C	GO:0015934|large ribosomal subunit(ISS)	other cytoplasmic components	C	GO:0015934|large ribosomal subunit(ISS)	ribosome	P	GO:0006412|translation(ISS)	protein metabolism	P	GO:0006412|translation(ISS)	other cellular processes	C
AT4G17390	P	GO:0042545|cell wall modification(RCA)	cell organization and biogenesis	P	GO:0006412|translation(ISS)	protein metabolism	C	GO:0005840|ribosome(ISS)	ribosome	C	GO:0022625|cytosolic large ribosomal subunit(IDA)	ribosome	C	GO:0005730|nucleolus(IDA)	other intracellular components	P	GO:0001510|RNA methylation(RCA)	other cellular processes	P	GO:0006412|translation(ISS)	other cellular processes	P	GO:0009664|plant-type cell wall organization(RCA)	other cellular processes	P	GO:0006342|chromatin silencing(RCA)	other metabolic processes	P	GO:0006342|chromatin silencing(RCA)	transcription,DNA-dependent	P	GO:0009664|plant-type cell wall organization(RCA)	cell organization and biogenesis	P	GO:0001510|RNA methylation(RCA)	other metabolic processes	P	GO:0006342|chromatin silencing(RCA)	other cellular processes	C	GO:0005737|cytoplasm(ISM)	other cytoplasmic components	F	GO:0003735|structural constituent of ribosome(ISS)	structural molecule activity	P	GO:0006412|translation(ISS)	other metabolic processes	C
AT3G13770	C	GO:0005739|mitochondrion(ISM)	mitochondria	P	GO:0008150|biological_process(ND)	unknown biological processes
AT1G65190	F	GO:0004672|protein kinase activity(ISS)	kinase activity	P	GO:0006468|protein phosphorylation(ISS)	other metabolic processes	F	GO:0004672|protein kinase activity(ISS)	transferase activity	F	GO:0005524|ATP binding(ISS)	nucleotide binding	F	GO:0005524|ATP binding(ISS)	other binding	P	GO:0006468|protein phosphorylation(ISS)	protein metabolism	P	GO:0006468|protein phosphorylation(ISS)	other cellular processes
AT1G66520	P	GO:0009152|purine ribonucleotide biosynthetic process(ISS)	other metabolic processes	P	GO:0009058|biosynthetic process(ISS)	other metabolic processes	F	GO:0008864|formyltetrahydrofolate deformylase activity(ISS)	hydrolase activity	P	GO:0009152|purine ribonucleotide biosynthetic process(ISS)	other cellular processes	F	GO:0016742|hydroxymethyl-, formyl- and related transferase activity(ISS)	transferase activity
AT1G77010	C	GO:0005739|mitochondrion(ISM)	mitochondria	P	GO:0008150|biological_process(ND)	unknown biological processes
AT1G55900	P	GO:0009853|photorespiration(RCA)	other cellular processes	C	GO:0005739|mitochondrion(IDA)	mitochondria	C	GO:0005739|mitochondrion(IDA)	mitochondria	P	GO:0009220|pyrimidine ribonucleotide biosynthetic process(RCA)	other cellular processes	C	GO:0005743|mitochondrial inner membrane(IDA)	other cytoplasmic components	P	GO:0006626|protein targeting to mitochondrion(RCA)	cell organization and biogenesis	P	GO:0009640|photomorphogenesis(RCA)	developmental processes	F	GO:0003674|molecular_function(ND)	unknown molecular functions	C	GO:0005743|mitochondrial inner membrane(IDA)	other intracellular components	P	GO:0009220|pyrimidine ribonucleotide biosynthetic process(RCA)	other metabolic processes	P	GO:0006626|protein targeting to mitochondrion(RCA)	transport	P	GO:0009640|photomorphogenesis(RCA)	response to abiotic or biotic stimulus	C	GO:0005739|mitochondrion(ISM)	mitochondria	C	GO:0005739|mitochondrion(ISM)	mitochondria	F	GO:0003674|molecular_function(ND)	unknown molecular functions	P	GO:0010388|cullin deneddylation(RCA)	protein metabolism	P
AT1G19520	P	GO:0009220|pyrimidine ribonucleotide biosynthetic process(RCA)	other cellular processes	P	GO:0009220|pyrimidine ribonucleotide biosynthetic process(RCA)	other metabolic processes	C	GO:0009507|chloroplast(ISM)	chloroplast	C	GO:0005739|mitochondrion(ISM)	mitochondria
AT1G59900	P	GO:0008152|metabolic process(ISS)	other metabolic processes	C	GO:0005739|mitochondrion(ISM)	mitochondria	C	GO:0005739|mitochondrion(IDA)	mitochondria	C	GO:0005634|nucleus(IDA)	nucleus	P	GO:0046686|response to cadmium ion(RCA)	other biological processes	C	GO:0005739|mitochondrion(IDA)	mitochondria	F	GO:0004739|pyruvate dehydrogenase (acetyl-transferring) activity(ISS)	other enzyme activity	P	GO:0046686|response to cadmium ion(IEP)	other biological processes	C	GO:0005739|mitochondrion(IDA)	mitochondria	C	GO:0005829|cytosol(IDA)	cytosol	P	GO:0046686|response to cadmium ion(IEP)	other biological processes
AT4G16720	C	GO:0022626|cytosolic ribosome(IDA)	other cytoplasmic components	C	GO:0022625|cytosolic large ribosomal subunit(IDA)	other intracellular components	C	GO:0022626|cytosolic ribosome(IDA)	other intracellular components	C	GO:0022626|cytosolic ribosome(IDA)	ribosome	C	GO:0005774|vacuolar membrane(IDA)	other intracellular components	P	GO:0001510|RNA methylation(RCA)	other metabolic processes	C	GO:0022626|cytosolic ribosome(IDA)	cytosol	C	GO:0022626|cytosolic ribosome(IDA)	other intracellular components	P	GO:0001510|RNA methylation(RCA)	other cellular processes	P	GO:0006412|translation(ISS)	protein metabolism	C	GO:0022626|cytosolic ribosome(IDA)	cytosol	C	GO:0022626|cytosolic ribosome(IDA)	cytosol	F	GO:0003735|structural constituent of ribosome(ISS)	structural molecule activity	C	GO:0022625|cytosolic large ribosomal subunit(IDA)	cytosol	C	GO:0022626|cytosolic ribosome(IDA)	other cytoplasmic components	C	GO:0022626|cytosolic ribosome(IDA)	other intracellular components	C
AT3G06050	P	GO:0006979|response to oxidative stress(IDA)	response to stress	C	GO:0005739|mitochondrion(IDA)	mitochondria	C	GO:0005739|mitochondrion(IDA)	mitochondria	F	GO:0016209|antioxidant activity(ISS)	other molecular functions	P	GO:0006096|glycolytic process(RCA)	other cellular processes	P	GO:0009060|aerobic respiration(RCA)	other cellular processes	C	GO:0005739|mitochondrion(IDA)	mitochondria	P	GO:0046686|response to cadmium ion(IEP)	other biological processes	C	GO:0005739|mitochondrion(IDA)	mitochondria	C	GO:0005739|mitochondrion(ISM)	mitochondria	C	GO:0005759|mitochondrial matrix(IDA)	mitochondria	P	GO:0006979|response to oxidative stress(IMP)	response to stress	C	GO:0005759|mitochondrial matrix(IDA)	other intracellular components	P	GO:0006096|glycolytic process(RCA)	electron transport or energy pathways	P	GO:0009060|aerobic respiration(RCA)	electron transport or energy pathways	P	GO:0006096|glycolytic process(RCA)	other metabolic processes	P
AT5G07090	F	GO:0003735|structural constituent of ribosome(ISS)	structural molecule activity	C	GO:0022626|cytosolic ribosome(IDA)	other intracellular components	C	GO:0022627|cytosolic small ribosomal subunit(ISS)	ribosome	C	GO:0022626|cytosolic ribosome(IDA)	other cytoplasmic components	C	GO:0005774|vacuolar membrane(IDA)	other cytoplasmic components	C	GO:0005774|vacuolar membrane(IDA)	other intracellular components	C	GO:0005774|vacuolar membrane(IDA)	other intracellular components	C	GO:0022626|cytosolic ribosome(IDA)	ribosome	C	GO:0005737|cytoplasm(ISM)	other cytoplasmic components	P	GO:0006412|translation(ISS)	other cellular processes	P	GO:0009220|pyrimidine ribonucleotide biosynthetic process(RCA)	other metabolic processes	C	GO:0005774|vacuolar membrane(IDA)	other membranes	C	GO:0022626|cytosolic ribosome(IDA)	cytosol	C	GO:0022627|cytosolic small ribosomal subunit(ISS)	other intracellular components	C	GO:0022627|cytosolic small ribosomal subunit(ISS)	other cytoplasmic components	C	GO:0022626|cytosolic ribosome(IDA)	cytosol	F
AT5G20180	C	GO:0005739|mitochondrion(ISM)	mitochondria	F	GO:0003735|structural constituent of ribosome(ISS)	structural molecule activity	C	GO:0005739|mitochondrion(ISM)	mitochondria	P	GO:0042254|ribosome biogenesis(ISS)	other biological processes	P	GO:0006354|DNA-templated transcription, elongation(RCA)	transcription,DNA-dependent	P	GO:0006354|DNA-templated transcription, elongation(RCA)	other metabolic processes	C	GO:0005840|ribosome(ISS)	ribosome	P	GO:0006354|DNA-templated transcription, elongation(RCA)	other cellular processes
AT5G56910	P	GO:0008150|biological_process(ND)	unknown biological processes	C	GO:0005634|nucleus(ISM)	nucleus
AT1G56690	C	GO:0005739|mitochondrion(ISM)	mitochondria	P	GO:0008150|biological_process(ND)	unknown biological processes
AT2G07667	P	GO:0008150|biological_process(ND)	unknown biological processes	C	GO:0005739|mitochondrion(ISM)	mitochondria	F	GO:0003674|molecular_function(ND)	unknown molecular functions	C	GO:0005739|mitochondrion(ISM)	mitochondria
AT2G19790	C	GO:0030125|clathrin vesicle coat(ISS)	other intracellular components	P	GO:0006301|postreplication repair(RCA)	DNA or RNA metabolism	P	GO:0006886|intracellular protein transport(ISS)	transport	C	GO:0030125|clathrin vesicle coat(ISS)	other membranes	P	GO:0006301|postreplication repair(RCA)	other cellular processes	P	GO:0006301|postreplication repair(RCA)	response to stress	C	GO:0005794|Golgi apparatus(ISM)	Golgi apparatus	P	GO:0006301|postreplication repair(RCA)	other metabolic processes	C	GO:0030125|clathrin vesicle coat(ISS)	other cytoplasmic components
AT1G02370	P	GO:0006626|protein targeting to mitochondrion(RCA)	other cellular processes	C	GO:0005739|mitochondrion(ISM)	mitochondria	P	GO:0008150|biological_process(ND)	unknown biological processes	F	GO:0003674|molecular_function(ND)	unknown molecular functions	P	GO:0006626|protein targeting to mitochondrion(RCA)	cell organization and biogenesis	P	GO:0006626|protein targeting to mitochondrion(RCA)	transport
AT3G50250	P	GO:0008150|biological_process(ND)	unknown biological processes	F	GO:0003674|molecular_function(ND)	unknown molecular functions
AT1G48200	C	GO:0005739|mitochondrion(IDA)	mitochondria	C	GO:0009507|chloroplast(ISM)	chloroplast	F	GO:0003674|molecular_function(ND)	unknown molecular functions	P	GO:0008150|biological_process(ND)	unknown biological processes
AT3G06040	F	GO:0003735|structural constituent of ribosome(ISS)	structural molecule activity	C	GO:0015934|large ribosomal subunit(ISS)	ribosome	P	GO:0006354|DNA-templated transcription, elongation(RCA)	transcription,DNA-dependent	C	GO:0015934|large ribosomal subunit(ISS)	other intracellular components	P	GO:0006354|DNA-templated transcription, elongation(RCA)	other cellular processes	P	GO:0006412|translation(ISS)	other metabolic processes	P	GO:0006354|DNA-templated transcription, elongation(RCA)	other metabolic processes	C	GO:0005739|mitochondrion(ISM)	mitochondria	P	GO:0006412|translation(ISS)	other cellular processes	C	GO:0005739|mitochondrion(ISM)	mitochondria	P	GO:0006412|translation(ISS)	protein metabolism	C	GO:0005739|mitochondrion(ISM)	mitochondria	C	GO:0015934|large ribosomal subunit(ISS)	other cytoplasmic components
AT1G30880	C	GO:0005739|mitochondrion(ISM)	mitochondria	P	GO:0008150|biological_process(ND)	unknown biological processes	F	GO:0003674|molecular_function(ND)	unknown molecular functions
AT4G08210	F	GO:0003674|molecular_function(ND)	unknown molecular functions	P	GO:0008150|biological_process(ND)	unknown biological processes	C	GO:0005739|mitochondrion(ISM)	mitochondria
AT2G33847	C	GO:0005739|mitochondrion(ISM)	mitochondria	C	GO:0005634|nucleus(ISM)	nucleus
AT2G35480	C	GO:0005739|mitochondrion(ISM)	mitochondria	P	GO:0008150|biological_process(ND)	unknown biological processes	F	GO:0003674|molecular_function(ND)	unknown molecular functions
AT2G06000	P	GO:0008150|biological_process(ND)	unknown biological processes	F	GO:0003674|molecular_function(ND)	unknown molecular functions	C	GO:0005739|mitochondrion(ISM)	mitochondria	C	GO:0005739|mitochondrion(ISM)	mitochondria
AT1G74270	C	GO:0005737|cytoplasm(ISM)	other cytoplasmic components	C	GO:0005840|ribosome(ISS)	ribosome	C	GO:0022625|cytosolic large ribosomal subunit(IDA)	ribosome	C	GO:0022625|cytosolic large ribosomal subunit(IDA)	other intracellular components	P	GO:0006412|translation(ISS)	other metabolic processes	F	GO:0003735|structural constituent of ribosome(ISS)	structural molecule activity	P	GO:0006412|translation(ISS)	other cellular processes	P	GO:0042254|ribosome biogenesis(ISS)	other biological processes	C	GO:0022625|cytosolic large ribosomal subunit(IDA)	other cytoplasmic components	C	GO:0022625|cytosolic large ribosomal subunit(IDA)	cytosol	P	GO:0006412|translation(ISS)	protein metabolism
AT4G12380	F	GO:0003674|molecular_function(ND)	unknown molecular functions	P	GO:0008150|biological_process(ND)	unknown biological processes	C	GO:0005739|mitochondrion(ISM)	mitochondria
AT1G08610	P	GO:0008150|biological_process(ND)	unknown biological processes	C	GO:0005739|mitochondrion(ISM)	mitochondria
AT5G60730	C	GO:0009507|chloroplast(ISM)	chloroplast	F	GO:0005524|ATP binding(ISS)	nucleotide binding	C	GO:0005739|mitochondrion(IDA)	mitochondria	F	GO:0005524|ATP binding(ISS)	other binding	C	GO:0016020|membrane(ISS)	other membranes	P	GO:0006820|anion transport(ISS)	transport
AT1G53240	P	GO:0009651|response to salt stress(IEP)	response to stress	P	GO:0009651|response to salt stress(RCA)	response to abiotic or biotic stimulus	C	GO:0005739|mitochondrion(IDA)	mitochondria	F	GO:0005507|copper ion binding(IDA)	other binding	P	GO:0006096|glycolytic process(RCA)	other metabolic processes	P	GO:0007030|Golgi organization(RCA)	other cellular processes	P	GO:0006833|water transport(RCA)	transport	C	GO:0005739|mitochondrion(IDA)	mitochondria	P	GO:0046686|response to cadmium ion(RCA)	other biological processes	F	GO:0030060|L-malate dehydrogenase activity(IMP)	other enzyme activity	P	GO:0009651|response to salt stress(IEP)	response to abiotic or biotic stimulus	P	GO:0006972|hyperosmotic response(RCA)	response to stress	C	GO:0005739|mitochondrion(IDA)	mitochondria	C	GO:0005618|cell wall(IDA)	cell wall	P	GO:0046686|response to cadmium ion(IEP)	other biological processes	C	GO:0005739|mitochondrion(ISM)	mitochondria	C
AT3G13845	P	GO:0008150|biological_process(ND)	unknown biological processes	F	GO:0003674|molecular_function(ND)	unknown molecular functions
AT4G29480	P	GO:0009853|photorespiration(RCA)	other cellular processes	C	GO:0005739|mitochondrion(IDA)	mitochondria	C	GO:0005739|mitochondrion(IDA)	mitochondria	P	GO:0006511|ubiquitin-dependent protein catabolic process(RCA)	other metabolic processes	P	GO:0019932|second-messenger-mediated signaling(RCA)	signal transduction	P	GO:0015992|proton transport(ISS)	transport	P	GO:0009853|photorespiration(RCA)	other metabolic processes	P	GO:0080129|proteasome core complex assembly(RCA)	cell organization and biogenesis	P	GO:0006511|ubiquitin-dependent protein catabolic process(RCA)	other cellular processes	P	GO:0051788|response to misfolded protein(RCA)	response to stress	P	GO:0046686|response to cadmium ion(RCA)	other biological processes	P	GO:0006511|ubiquitin-dependent protein catabolic process(RCA)	protein metabolism
AT2G44620	P	GO:0051607|defense response to virus(RCA)	response to abiotic or biotic stimulus	P	GO:0006633|fatty acid biosynthetic process(IDA)	other cellular processes	P	GO:0006633|fatty acid biosynthetic process(IDA)	other metabolic processes	C	GO:0005739|mitochondrion(ISM)	mitochondria	C	GO:0005759|mitochondrial matrix(IDA)	other cytoplasmic components	C	GO:0005759|mitochondrial matrix(IDA)	mitochondria	P	GO:0006633|fatty acid biosynthetic process(ISS)	other cellular processes	P	GO:0010267|production of ta-siRNAs involved in RNA interference(RCA)	other metabolic processes	C	GO:0005759|mitochondrial matrix(IDA)	other intracellular components	F	GO:0000036|ACP phosphopantetheine attachment site binding involved in fatty acid biosynthetic process(ISS)	other binding	P	GO:0035196|production of miRNAs involved in gene silencing by miRNA(RCA)	other cellular processes	P	GO:0051607|defense response to virus(RCA)	response to stress	P	GO:0035196|production of miRNAs involved in gene silencing by miRNA(RCA)	other metabolic processes	P	GO:0006633|fatty acid biosynthetic process(ISS)	other metabolic processes	C	GO:0005739|mitochondrion(IDA)	mitochondria	P	GO:0010267|production of ta-siRNAs involved in RNA interference(RCA)	other cellular processes
ATMG00130	F	GO:0003674|molecular_function(ND)	unknown molecular functions	P	GO:0008150|biological_process(ND)	unknown biological processes	C	GO:0005739|mitochondrion(ISM)	mitochondria
AT5G11630	P	GO:0048364|root development(IMP)	developmental processes	F	GO:0003674|molecular_function(ND)	unknown molecular functions	C	GO:0005739|mitochondrion(IDA)	mitochondria	P	GO:0050832|defense response to fungus(IMP)	response to abiotic or biotic stimulus	P	GO:0042742|defense response to bacterium(IMP)	response to stress	P	GO:0042742|defense response to bacterium(IMP)	response to abiotic or biotic stimulus	P	GO:0050832|defense response to fungus(IMP)	response to stress	P	GO:0071433|cell wall repair(IMP)	other cellular processes	P	GO:0071433|cell wall repair(IMP)	cell organization and biogenesis
AT1G77360	F	GO:0003674|molecular_function(ND)	unknown molecular functions	P	GO:0008150|biological_process(ND)	unknown biological processes	C	GO:0005739|mitochondrion(ISM)	mitochondria
AT1G27000	P	GO:0006355|regulation of transcription, DNA-templated(ISS)	other cellular processes	F	GO:0003677|DNA binding(ISS)	DNA or RNA binding	P	GO:0006355|regulation of transcription, DNA-templated(ISS)	transcription,DNA-dependent	P	GO:0006355|regulation of transcription, DNA-templated(ISS)	other metabolic processes
AT2G25580	C	GO:0005739|mitochondrion(ISM)	mitochondria	F	GO:0003674|molecular_function(ND)	unknown molecular functions	P	GO:0008150|biological_process(ND)	unknown biological processes
AT5G35732	F	GO:0003674|molecular_function(ND)	unknown molecular functions	P	GO:0008150|biological_process(ND)	unknown biological processes	F	GO:0003674|molecular_function(ND)	unknown molecular functions	C	GO:0005634|nucleus(ISM)	nucleus
AT4G31460	F	GO:0003735|structural constituent of ribosome(ISS)	structural molecule activity	C	GO:0005739|mitochondrion(ISM)	mitochondria
AT4G00570	C	GO:0005739|mitochondrion(IDA)	mitochondria	C	GO:0005739|mitochondrion(IDA)	mitochondria	P	GO:0006108|malate metabolic process(ISS)	other metabolic processes	F	GO:0050897|cobalt ion binding(IDA)	other binding	F	GO:0004470|malic enzyme activity(ISS)	other enzyme activity	F	GO:0042803|protein homodimerization activity(IDA)	protein binding	F	GO:0005524|ATP binding(IDA)	nucleotide binding	C	GO:0005739|mitochondrion(ISM)	mitochondria	P	GO:0006108|malate metabolic process(IDA)	other cellular processes	F	GO:0016652|oxidoreductase activity, acting on NAD(P)H, NAD(P) as acceptor(ISS)	other enzyme activity	F	GO:0005515|protein binding(IPI)	protein binding	P	GO:0006108|malate metabolic process(IDA)	other metabolic processes	C	GO:0009507|chloroplast(IDA)	chloroplast	C	GO:0005739|mitochondrion(IDA)	mitochondria	P	GO:0006108|malate metabolic process(ISS)	other cellular processes	F	GO:0008270|zinc ion binding(IDA)	other binding	F
AT1G51900	F	GO:0003674|molecular_function(ND)	unknown molecular functions	C	GO:0005634|nucleus(ISM)	nucleus	P	GO:0008150|biological_process(ND)	unknown biological processes
AT1G53600	C	GO:0005739|mitochondrion(ISM)	mitochondria	F	GO:0003674|molecular_function(ND)	unknown molecular functions	P	GO:0008150|biological_process(ND)	unknown biological processes
AT3G60980	C	GO:0005739|mitochondrion(ISM)	mitochondria	P	GO:0006979|response to oxidative stress(IMP)	response to stress
AT1G28210	C	GO:0005739|mitochondrion(ISM)	mitochondria	C	GO:0005739|mitochondrion(ISS)	mitochondria	P	GO:0006457|protein folding(ISS)	protein metabolism	P	GO:0006457|protein folding(ISS)	other metabolic processes	P	GO:0006457|protein folding(ISS)	other cellular processes	C	GO:0005739|mitochondrion(ISM)	mitochondria
AT3G20180	C	GO:0005575|cellular_component(ND)	unknown cellular components
AT3G45770	C	GO:0005739|mitochondrion(ISM)	mitochondria	C	GO:0009507|chloroplast(IDA)	chloroplast	C	GO:0005739|mitochondrion(ISM)	mitochondria	F	GO:0005507|copper ion binding(IDA)	other binding	F	GO:0005524|ATP binding(IDA)	nucleotide binding	F	GO:0005524|ATP binding(IDA)	nucleotide binding	C	GO:0005739|mitochondrion(IDA)	mitochondria	F	GO:0008270|zinc ion binding(ISS)	other binding	C	GO:0005739|mitochondrion(IDA)	mitochondria	C	GO:0009507|chloroplast(IDA)	chloroplast	C	GO:0005634|nucleus(IDA)	nucleus	C	GO:0005739|mitochondrion(IDA)	mitochondria	F	GO:0005524|ATP binding(IDA)	other binding	F	GO:0005524|ATP binding(IDA)	other binding
AT5G39600	C	GO:0005575|cellular_component(ND)	unknown cellular components	P	GO:0000394|RNA splicing, via endonucleolytic cleavage and ligation(RCA)	other metabolic processes	P	GO:0000394|RNA splicing, via endonucleolytic cleavage and ligation(RCA)	other cellular processes	P	GO:0009086|methionine biosynthetic process(RCA)	other cellular processes	P	GO:0008150|biological_process(ND)	unknown biological processes	F	GO:0003674|molecular_function(ND)	unknown molecular functions	P	GO:0009086|methionine biosynthetic process(RCA)	other metabolic processes
AT3G12770	P	GO:0080156|mitochondrial mRNA modification(IMP)	other cellular processes	P	GO:0080156|mitochondrial mRNA modification(IMP)	other metabolic processes	C	GO:0009507|chloroplast(ISM)	chloroplast	F	GO:0003674|molecular_function(ND)	unknown molecular functions
AT5G40610	C	GO:0009331|glycerol-3-phosphate dehydrogenase complex(ISS)	other cytoplasmic components	F	GO:0004367|glycerol-3-phosphate dehydrogenase [NAD+] activity(IDA)	other enzyme activity	F	GO:0004367|glycerol-3-phosphate dehydrogenase [NAD+] activity(ISS)	other enzyme activity	P	GO:0006072|glycerol-3-phosphate metabolic process(ISS)	other cellular processes	P	GO:0046167|glycerol-3-phosphate biosynthetic process(IDA)	other metabolic processes	C	GO:0009507|chloroplast(ISM)	chloroplast	P	GO:0006072|glycerol-3-phosphate metabolic process(ISS)	other metabolic processes	C	GO:0009331|glycerol-3-phosphate dehydrogenase complex(ISS)	other intracellular components	C	GO:0009507|chloroplast(IDA)	chloroplast	P	GO:0046167|glycerol-3-phosphate biosynthetic process(IDA)	other cellular processes
AT5G24830	P	GO:0007131|reciprocal meiotic recombination(RCA)	other cellular processes	P	GO:0042138|meiotic DNA double-strand break formation(RCA)	other metabolic processes	C	GO:0005739|mitochondrion(ISM)	mitochondria	P	GO:0007062|sister chromatid cohesion(RCA)	cell organization and biogenesis	P	GO:0042138|meiotic DNA double-strand break formation(RCA)	cell organization and biogenesis	P	GO:0007062|sister chromatid cohesion(RCA)	other cellular processes	P	GO:0007131|reciprocal meiotic recombination(RCA)	other metabolic processes	P	GO:0007131|reciprocal meiotic recombination(RCA)	cell organization and biogenesis	P	GO:0042138|meiotic DNA double-strand break formation(RCA)	other cellular processes	P	GO:0007131|reciprocal meiotic recombination(RCA)	DNA or RNA metabolism	P	GO:0045132|meiotic chromosome segregation(RCA)	other cellular processes	P	GO:0033044|regulation of chromosome organization(RCA)	cell organization and biogenesis	P	GO:0008150|biological_process(ND)	unknown biological processes	P	GO:0045132|meiotic chromosome segregation(RCA)	cell organization and biogenesis	P	GO:0033044|regulation of chromosome organization(RCA)	other cellular processes
AT1G31840	C	GO:0005739|mitochondrion(ISM)	mitochondria	C	GO:0005739|mitochondrion(ISM)	mitochondria
AT5G66631	C	GO:0009507|chloroplast(ISM)	chloroplast	F	GO:0003674|molecular_function(ND)	unknown molecular functions	P	GO:0008150|biological_process(ND)	unknown biological processes
AT1G24095	C	GO:0005739|mitochondrion(ISM)	mitochondria
AT1G12700	P	GO:0080156|mitochondrial mRNA modification(IMP)	other cellular processes	P	GO:0080156|mitochondrial mRNA modification(IMP)	other metabolic processes	C	GO:0005739|mitochondrion(ISM)	mitochondria
AT3G44690	C	GO:0005739|mitochondrion(ISM)	mitochondria	F	GO:0003674|molecular_function(ND)	unknown molecular functions	P	GO:0008150|biological_process(ND)	unknown biological processes
AT4G34670	C	GO:0022626|cytosolic ribosome(IDA)	other cytoplasmic components	C	GO:0022627|cytosolic small ribosomal subunit(IDA)	other cytoplasmic components	C	GO:0022627|cytosolic small ribosomal subunit(ISS)	ribosome	C	GO:0005737|cytoplasm(ISM)	other cytoplasmic components	C	GO:0005618|cell wall(IDA)	cell wall	C	GO:0022626|cytosolic ribosome(IDA)	cytosol	C	GO:0022626|cytosolic ribosome(IDA)	other intracellular components	C	GO:0005886|plasma membrane(IDA)	plasma membrane	C	GO:0022626|cytosolic ribosome(IDA)	cytosol	C	GO:0022626|cytosolic ribosome(IDA)	ribosome	C	GO:0022627|cytosolic small ribosomal subunit(ISS)	other intracellular components	C	GO:0009506|plasmodesma(IDA)	other cellular components	P	GO:0006412|translation(ISS)	protein metabolism	C	GO:0022627|cytosolic small ribosomal subunit(ISS)	other cytoplasmic components	C	GO:0022627|cytosolic small ribosomal subunit(ISS)	cytosol	C	GO:0022626|cytosolic ribosome(IDA)	other cytoplasmic components	P
AT3G12650	C	GO:0005739|mitochondrion(ISM)	mitochondria	C	GO:0005739|mitochondrion(IDA)	mitochondria	F	GO:0003674|molecular_function(ND)	unknown molecular functions	P	GO:0008150|biological_process(ND)	unknown biological processes
AT5G42310	C	GO:0009507|chloroplast(IDA)	chloroplast	C	GO:0005739|mitochondrion(ISM)	mitochondria
AT2G46505	C	GO:0016020|membrane(IDA)	other membranes	P	GO:0006096|glycolytic process(RCA)	electron transport or energy pathways	P	GO:0006096|glycolytic process(RCA)	other metabolic processes	C	GO:0005749|mitochondrial respiratory chain complex II, succinate dehydrogenase complex (ubiquinone)(ISS)	other intracellular components	P	GO:0009060|aerobic respiration(RCA)	other cellular processes	C	GO:0005749|mitochondrial respiratory chain complex II, succinate dehydrogenase complex (ubiquinone)(ISS)	mitochondria	C	GO:0005749|mitochondrial respiratory chain complex II, succinate dehydrogenase complex (ubiquinone)(IDA)	mitochondria	P	GO:0006096|glycolytic process(RCA)	other cellular processes	C	GO:0005739|mitochondrion(ISM)	mitochondria	P	GO:0009060|aerobic respiration(RCA)	electron transport or energy pathways	C	GO:0005749|mitochondrial respiratory chain complex II, succinate dehydrogenase complex (ubiquinone)(ISS)	other cytoplasmic components	P	GO:0006099|tricarboxylic acid cycle(TAS)	other metabolic processes	C	GO:0005739|mitochondrion(IDA)	mitochondria	F	GO:0008177|succinate dehydrogenase (ubiquinone) activity(ISS)	other enzyme activity	P	GO:0046686|response to cadmium ion(RCA)	other biological processes	C	GO:0005749|mitochondrial respiratory chain complex II, succinate dehydrogenase complex (ubiquinone)(IDA)	other cytoplasmic components	C
AT5G59440	F	GO:0004798|thymidylate kinase activity(ISS)	transferase activity	C	GO:0005829|cytosol(IDA)	cytosol	C	GO:0005737|cytoplasm(IDA)	other cytoplasmic components	C	GO:0005829|cytosol(IDA)	cytosol	F	GO:0004798|thymidylate kinase activity(ISS)	kinase activity	C	GO:0005654|nucleoplasm(IDA)	nucleus	C	GO:0009507|chloroplast(ISM)	chloroplast	C	GO:0005654|nucleoplasm(IDA)	other intracellular components	C	GO:0005829|cytosol(IDA)	cytosol	C	GO:0005739|mitochondrion(IDA)	mitochondria	C	GO:0009507|chloroplast(ISM)	chloroplast
AT5G02130	C	GO:0005575|cellular_component(ND)	unknown cellular components	P	GO:0009688|abscisic acid biosynthetic process(RCA)	other cellular processes	P	GO:0009688|abscisic acid biosynthetic process(RCA)	other metabolic processes	P	GO:0008150|biological_process(ND)	unknown biological processes
AT1G80560	P	GO:0009098|leucine biosynthetic process(ISS)	other metabolic processes	F	GO:0003862|3-isopropylmalate dehydrogenase activity(IGI)	other enzyme activity	P	GO:0009098|leucine biosynthetic process(IGI)	other metabolic processes	C	GO:0009570|chloroplast stroma(IDA)	chloroplast	C	GO:0009570|chloroplast stroma(IDA)	chloroplast	P	GO:0009098|leucine biosynthetic process(IGI)	other cellular processes	C	GO:0009941|chloroplast envelope(IDA)	other cytoplasmic components	C	GO:0009570|chloroplast stroma(IDA)	other cytoplasmic components	P	GO:0008152|metabolic process(ISS)	other metabolic processes	C	GO:0009941|chloroplast envelope(IDA)	other intracellular components	C	GO:0009570|chloroplast stroma(IDA)	plastid	C	GO:0009507|chloroplast(ISM)	chloroplast	P	GO:0009098|leucine biosynthetic process(ISS)	other cellular processes	P	GO:0006744|ubiquinone biosynthetic process(RCA)	other metabolic processes	P	GO:0006744|ubiquinone biosynthetic process(RCA)	other cellular processes	C	GO:0009941|chloroplast envelope(IDA)	plastid	C
AT1G07070	F	GO:0003735|structural constituent of ribosome(ISS)	structural molecule activity	C	GO:0005737|cytoplasm(ISM)	other cytoplasmic components	C	GO:0005840|ribosome(ISS)	ribosome	C	GO:0005829|cytosol(IDA)	cytosol	P	GO:0006412|translation(ISS)	protein metabolism	P	GO:0006412|translation(ISS)	other metabolic processes	P	GO:0042254|ribosome biogenesis(ISS)	other biological processes	C	GO:0022625|cytosolic large ribosomal subunit(IDA)	other cytoplasmic components	C	GO:0022625|cytosolic large ribosomal subunit(IDA)	ribosome	C	GO:0022625|cytosolic large ribosomal subunit(IDA)	other intracellular components	P	GO:0006412|translation(ISS)	other cellular processes	C	GO:0022625|cytosolic large ribosomal subunit(IDA)	cytosol
AT5G09950	C	GO:0005739|mitochondrion(ISM)	mitochondria	F	GO:0003674|molecular_function(ND)	unknown molecular functions	P	GO:0009451|RNA modification(IMP)	other cellular processes	P	GO:0009451|RNA modification(IMP)	other metabolic processes
AT3G04750	F	GO:0003674|molecular_function(ND)	unknown molecular functions	P	GO:0008150|biological_process(ND)	unknown biological processes	C	GO:0005739|mitochondrion(ISM)	mitochondria
AT1G76280	C	GO:0005739|mitochondrion(ISM)	mitochondria	P	GO:0008150|biological_process(ND)	unknown biological processes	C	GO:0009507|chloroplast(ISM)	chloroplast	F	GO:0003674|molecular_function(ND)	unknown molecular functions	C	GO:0005739|mitochondrion(ISM)	mitochondria
AT4G11010	C	GO:0005739|mitochondrion(IDA)	mitochondria	F	GO:0005524|ATP binding(ISS)	nucleotide binding	F	GO:0005524|ATP binding(ISS)	other binding	P	GO:0009853|photorespiration(RCA)	other cellular processes	C	GO:0009507|chloroplast(ISM)	chloroplast	F	GO:0004550|nucleoside diphosphate kinase activity(ISS)	kinase activity	C	GO:0005743|mitochondrial inner membrane(IDA)	other cytoplasmic components	C	GO:0005743|mitochondrial inner membrane(IDA)	other membranes	P	GO:0006979|response to oxidative stress(IDA)	response to stress	C	GO:0005739|mitochondrion(IDA)	mitochondria	C	GO:0005743|mitochondrial inner membrane(IDA)	mitochondria	F	GO:0004550|nucleoside diphosphate kinase activity(ISS)	transferase activity	F	GO:0050897|cobalt ion binding(IDA)	other binding	P	GO:0019932|second-messenger-mediated signaling(RCA)	signal transduction	C	GO:0005739|mitochondrion(IDA)	mitochondria	C	GO:0005739|mitochondrion(IDA)	mitochondria	C
AT1G08580	F	GO:0003674|molecular_function(ND)	unknown molecular functions	C	GO:0005634|nucleus(ISM)	nucleus	P	GO:0008150|biological_process(ND)	unknown biological processes
AT1G01290	P	GO:0006777|Mo-molybdopterin cofactor biosynthetic process(IGI)	protein metabolism	P	GO:0006777|Mo-molybdopterin cofactor biosynthetic process(IGI)	other cellular processes	F	GO:0003824|catalytic activity(IGI)	other enzyme activity	C	GO:0005739|mitochondrion(ISS)	mitochondria	P	GO:0006777|Mo-molybdopterin cofactor biosynthetic process(IGI)	other metabolic processes	C	GO:0009507|chloroplast(ISS)	chloroplast
AT4G37480	P	GO:0006457|protein folding(ISS)	other cellular processes	P	GO:0006457|protein folding(ISS)	other metabolic processes	P	GO:0006457|protein folding(ISS)	protein metabolism
AT4G11670	P	GO:0006486|protein glycosylation(RCA)	other metabolic processes	P	GO:0006486|protein glycosylation(RCA)	protein metabolism	P	GO:0006888|ER to Golgi vesicle-mediated transport(RCA)	transport	P	GO:0008150|biological_process(ND)	unknown biological processes	P	GO:0043090|amino acid import(RCA)	transport	F	GO:0003674|molecular_function(ND)	unknown molecular functions	C	GO:0005634|nucleus(ISM)	nucleus	P	GO:0006486|protein glycosylation(RCA)	other cellular processes
AT3G21400	C	GO:0005739|mitochondrion(IDA)	mitochondria	F	GO:0003674|molecular_function(ND)	unknown molecular functions
AT5G12100	C	GO:0005739|mitochondrion(ISM)	mitochondria	F	GO:0008270|zinc ion binding(IDA)	other binding
AT4G01100	C	GO:0016020|membrane(IDA)	other membranes	C	GO:0005743|mitochondrial inner membrane(ISS)	other membranes	C	GO:0005743|mitochondrial inner membrane(ISS)	mitochondria	P	GO:0006007|glucose catabolic process(RCA)	other metabolic processes	P	GO:0006096|glycolytic process(RCA)	electron transport or energy pathways	C	GO:0005739|mitochondrion(IDA)	mitochondria	P	GO:0006096|glycolytic process(RCA)	other cellular processes	C	GO:0005743|mitochondrial inner membrane(ISS)	other cytoplasmic components	F	GO:0015217|ADP transmembrane transporter activity(IDA)	transporter activity	P	GO:0009060|aerobic respiration(RCA)	other cellular processes	C	GO:0005739|mitochondrion(IDA)	mitochondria	C	GO:0009536|plastid(IDA)	plastid	C	GO:0005743|mitochondrial inner membrane(ISS)	other intracellular components	P	GO:0009060|aerobic respiration(IDA)	other cellular processes	P	GO:0046686|response to cadmium ion(RCA)	other biological processes	P	GO:0009651|response to salt stress(RCA)	response to abiotic or biotic stimulus	P
AT2G23940	P	GO:0006511|ubiquitin-dependent protein catabolic process(RCA)	protein metabolism	P	GO:0009853|photorespiration(RCA)	other metabolic processes	P	GO:0080129|proteasome core complex assembly(RCA)	cell organization and biogenesis	P	GO:0009853|photorespiration(RCA)	other cellular processes	P	GO:0051788|response to misfolded protein(RCA)	response to stress	C	GO:0005783|endoplasmic reticulum(IDA)	ER	P	GO:0006511|ubiquitin-dependent protein catabolic process(RCA)	other cellular processes	P	GO:0006511|ubiquitin-dependent protein catabolic process(RCA)	other metabolic processes	C	GO:0005886|plasma membrane(IDA)	plasma membrane
AT1G53460	C	GO:0009507|chloroplast(ISM)	chloroplast
AT3G60050	F	GO:0003674|molecular_function(ND)	unknown molecular functions	C	GO:0005739|mitochondrion(ISM)	mitochondria	P	GO:0008150|biological_process(ND)	unknown biological processes
AT5G55140	C	GO:0015934|large ribosomal subunit(ISS)	ribosome	P	GO:0042254|ribosome biogenesis(ISS)	other biological processes	F	GO:0003735|structural constituent of ribosome(ISS)	structural molecule activity	P	GO:0006354|DNA-templated transcription, elongation(RCA)	other metabolic processes	P	GO:0006354|DNA-templated transcription, elongation(RCA)	other cellular processes	P	GO:0006354|DNA-templated transcription, elongation(RCA)	transcription,DNA-dependent	C	GO:0015934|large ribosomal subunit(ISS)	other cytoplasmic components	C	GO:0015934|large ribosomal subunit(ISS)	other intracellular components
AT3G49910	P	GO:0009409|response to cold(IEP)	response to abiotic or biotic stimulus	C	GO:0022626|cytosolic ribosome(IDA)	cytosol	F	GO:0003735|structural constituent of ribosome(ISS)	structural molecule activity	C	GO:0022626|cytosolic ribosome(IDA)	other intracellular components	C	GO:0015934|large ribosomal subunit(ISS)	other cytoplasmic components	P	GO:0006412|translation(ISS)	protein metabolism	C	GO:0022626|cytosolic ribosome(IDA)	ribosome	C	GO:0022625|cytosolic large ribosomal subunit(IDA)	cytosol	C	GO:0022626|cytosolic ribosome(IDA)	other intracellular components	C	GO:0005730|nucleolus(IDA)	other intracellular components	C	GO:0022626|cytosolic ribosome(IDA)	other cytoplasmic components	C	GO:0015934|large ribosomal subunit(ISS)	other intracellular components	P	GO:0001510|RNA methylation(RCA)	other metabolic processes	C	GO:0005774|vacuolar membrane(IDA)	other membranes	C	GO:0022625|cytosolic large ribosomal subunit(IDA)	other cytoplasmic components	C	GO:0005829|cytosol(IDA)	cytosol	P
AT5G18390	F	GO:0003674|molecular_function(ND)	unknown molecular functions	C	GO:0005739|mitochondrion(ISM)	mitochondria	P	GO:0008150|biological_process(ND)	unknown biological processes
AT1G48520	F	GO:0050567|glutaminyl-tRNA synthase (glutamine-hydrolyzing) activity(ISS)	other enzyme activity	C	GO:0009570|chloroplast stroma(IDA)	other intracellular components	C	GO:0009507|chloroplast(IDA)	chloroplast	C	GO:0009570|chloroplast stroma(IDA)	other cytoplasmic components	P	GO:0006424|glutamyl-tRNA aminoacylation(ISS)	protein metabolism	P	GO:0006424|glutamyl-tRNA aminoacylation(ISS)	other metabolic processes	C	GO:0009507|chloroplast(IDA)	chloroplast	C	GO:0009507|chloroplast(IDA)	chloroplast	C	GO:0009570|chloroplast stroma(IDA)	other intracellular components	C	GO:0005739|mitochondrion(ISM)	mitochondria	C	GO:0005739|mitochondrion(ISM)	mitochondria	C	GO:0005739|mitochondrion(ISM)	mitochondria	C	GO:0009570|chloroplast stroma(IDA)	plastid	C	GO:0009570|chloroplast stroma(IDA)	plastid	P	GO:0006424|glutamyl-tRNA aminoacylation(ISS)	other cellular processes	P	GO:0016556|mRNA modification(RCA)	other metabolic processes	P
AT5G16120	C	GO:0009506|plasmodesma(IDA)	other cellular components	C	GO:0005737|cytoplasm(ISM)	other cytoplasmic components	F	GO:0016787|hydrolase activity(ISS)	hydrolase activity	C	GO:0005737|cytoplasm(ISM)	other cytoplasmic components
AT4G34030	C	GO:0005739|mitochondrion(TAS)	mitochondria	P	GO:0010050|vegetative phase change(RCA)	developmental processes	F	GO:0008270|zinc ion binding(IDA)	other binding	C	GO:0005759|mitochondrial matrix(ISS)	other cytoplasmic components	P	GO:0006552|leucine catabolic process(IDA)	other cellular processes	C	GO:0005739|mitochondrion(IDA)	mitochondria	C	GO:0005739|mitochondrion(ISM)	mitochondria	C	GO:0005759|mitochondrial matrix(ISS)	mitochondria	F	GO:0004075|biotin carboxylase activity(ISS)	other enzyme activity	P	GO:0006552|leucine catabolic process(IDA)	other metabolic processes	P	GO:0009616|virus induced gene silencing(RCA)	response to stress	C	GO:0005739|mitochondrion(IDA)	mitochondria	F	GO:0050897|cobalt ion binding(IDA)	other binding	C	GO:0005759|mitochondrial matrix(ISS)	other intracellular components	P	GO:0009616|virus induced gene silencing(RCA)	response to abiotic or biotic stimulus
AT1G52855	F	GO:0003674|molecular_function(ND)	unknown molecular functions	C	GO:0005576|extracellular region(ISM)	extracellular	F	GO:0003674|molecular_function(ND)	unknown molecular functions	P	GO:0008150|biological_process(ND)	unknown biological processes
AT4G30800	P	GO:0006412|translation(ISS)	protein metabolism	P	GO:0001510|RNA methylation(RCA)	other cellular processes	C	GO:0005737|cytoplasm(ISM)	other cytoplasmic components	C	GO:0022627|cytosolic small ribosomal subunit(ISS)	cytosol	F	GO:0003735|structural constituent of ribosome(ISS)	structural molecule activity	P	GO:0034968|histone lysine methylation(RCA)	other cellular processes	P	GO:0034968|histone lysine methylation(RCA)	cell organization and biogenesis	C	GO:0022627|cytosolic small ribosomal subunit(ISS)	other intracellular components	C	GO:0022627|cytosolic small ribosomal subunit(IDA)	other intracellular components	C	GO:0022627|cytosolic small ribosomal subunit(IDA)	ribosome	P	GO:0034968|histone lysine methylation(RCA)	other metabolic processes	C	GO:0022627|cytosolic small ribosomal subunit(ISS)	other cytoplasmic components	C	GO:0022627|cytosolic small ribosomal subunit(IDA)	other cytoplasmic components	C	GO:0022627|cytosolic small ribosomal subunit(ISS)	ribosome	C	GO:0022627|cytosolic small ribosomal subunit(IDA)	cytosol	P	GO:0034968|histone lysine methylation(RCA)	protein metabolism	P
AT3G61530	C	GO:0009507|chloroplast(ISM)	chloroplast	P	GO:0015940|pantothenate biosynthetic process(IGI)	other cellular processes	F	GO:0003864|3-methyl-2-oxobutanoate hydroxymethyltransferase activity(IGI)	transferase activity	P	GO:0015940|pantothenate biosynthetic process(ISS)	other cellular processes	P	GO:0015940|pantothenate biosynthetic process(ISS)	other metabolic processes	P	GO:0015940|pantothenate biosynthetic process(IGI)	other metabolic processes	C	GO:0005739|mitochondrion(IDA)	mitochondria	C	GO:0009507|chloroplast(ISM)	chloroplast	F	GO:0050897|cobalt ion binding(IDA)	other binding	F	GO:0008270|zinc ion binding(IDA)	other binding	F	GO:0003864|3-methyl-2-oxobutanoate hydroxymethyltransferase activity(ISS)	transferase activity
AT1G63630	C	GO:0005739|mitochondrion(ISM)	mitochondria	C	GO:0005739|mitochondrion(ISM)	mitochondria	P	GO:0008150|biological_process(ND)	unknown biological processes
AT3G25210	F	GO:0003674|molecular_function(ND)	unknown molecular functions	C	GO:0005739|mitochondrion(ISM)	mitochondria	P	GO:0008150|biological_process(ND)	unknown biological processes
AT2G35130	F	GO:0003674|molecular_function(ND)	unknown molecular functions	C	GO:0005739|mitochondrion(ISM)	mitochondria	C	GO:0005739|mitochondrion(ISM)	mitochondria	P	GO:0008150|biological_process(ND)	unknown biological processes
AT1G17560	F	GO:0003735|structural constituent of ribosome(ISS)	structural molecule activity	C	GO:0005840|ribosome(ISS)	ribosome	P	GO:0006412|translation(ISS)	other cellular processes	P	GO:0006412|translation(ISS)	protein metabolism	P	GO:0006412|translation(ISS)	other metabolic processes	P	GO:0006354|DNA-templated transcription, elongation(RCA)	other metabolic processes	C	GO:0005739|mitochondrion(IDA)	mitochondria	C	GO:0009507|chloroplast(ISM)	chloroplast	P	GO:0006354|DNA-templated transcription, elongation(RCA)	transcription,DNA-dependent	P	GO:0006354|DNA-templated transcription, elongation(RCA)	other cellular processes
AT5G43822	P	GO:0008150|biological_process(ND)	unknown biological processes	C	GO:0005739|mitochondrion(ISM)	mitochondria	F	GO:0003674|molecular_function(ND)	unknown molecular functions
AT3G46870	C	GO:0009507|chloroplast(IDA)	chloroplast	C	GO:0005739|mitochondrion(ISM)	mitochondria	P	GO:0008150|biological_process(ND)	unknown biological processes	F	GO:0008270|zinc ion binding(IDA)	other binding
AT5G63890	C	GO:0009570|chloroplast stroma(IDA)	other intracellular components	P	GO:0008295|spermidine biosynthetic process(RCA)	other cellular processes	F	GO:0004399|histidinol dehydrogenase activity(TAS)	other enzyme activity	P	GO:0009411|response to UV(IEP)	response to abiotic or biotic stimulus	C	GO:0009570|chloroplast stroma(IDA)	chloroplast	C	GO:0009507|chloroplast(IDA)	chloroplast	C	GO:0009570|chloroplast stroma(IDA)	other intracellular components	C	GO:0009570|chloroplast stroma(IDA)	plastid	P	GO:0009555|pollen development(IMP)	developmental processes	C	GO:0009507|chloroplast(ISM)	chloroplast	C	GO:0009507|chloroplast(ISM)	chloroplast	C	GO:0009507|chloroplast(IDA)	chloroplast	P	GO:0008295|spermidine biosynthetic process(RCA)	other metabolic processes	C	GO:0009570|chloroplast stroma(IDA)	plastid	C	GO:0009570|chloroplast stroma(IDA)	chloroplast	C	GO:0009570|chloroplast stroma(IDA)	other cytoplasmic components	C
AT1G74600	P	GO:0080156|mitochondrial mRNA modification(IMP)	other cellular processes	C	GO:0005739|mitochondrion(IDA)	mitochondria	C	GO:0005739|mitochondrion(ISM)	mitochondria	P	GO:0080156|mitochondrial mRNA modification(IMP)	other metabolic processes	C	GO:0009507|chloroplast(IDA)	chloroplast
ATMG01020	P	GO:0008150|biological_process(ND)	unknown biological processes	F	GO:0003674|molecular_function(ND)	unknown molecular functions	C	GO:0005739|mitochondrion(ISM)	mitochondria
AT4G20930	C	GO:0005739|mitochondrion(ISM)	mitochondria	F	GO:0004616|phosphogluconate dehydrogenase (decarboxylating) activity(ISS)	other enzyme activity
AT5G15910	C	GO:0005739|mitochondrion(IDA)	mitochondria	C	GO:0005739|mitochondrion(ISM)	mitochondria	P	GO:0010264|myo-inositol hexakisphosphate biosynthetic process(RCA)	other metabolic processes	P	GO:0010264|myo-inositol hexakisphosphate biosynthetic process(RCA)	other cellular processes
AT1G63320	C	GO:0005739|mitochondrion(ISM)	mitochondria	P	GO:0008150|biological_process(ND)	unknown biological processes
AT3G05590	F	GO:0003735|structural constituent of ribosome(ISS)	structural molecule activity	P	GO:0006412|translation(TAS)	protein metabolism	C	GO:0009507|chloroplast(IDA)	chloroplast	C	GO:0005774|vacuolar membrane(IDA)	other cytoplasmic components	C	GO:0015934|large ribosomal subunit(ISS)	ribosome	C	GO:0015934|large ribosomal subunit(IDA)	ribosome	C	GO:0005774|vacuolar membrane(IDA)	other intracellular components	C	GO:0015934|large ribosomal subunit(TAS)	other cytoplasmic components	C	GO:0015934|large ribosomal subunit(IDA)	other cytoplasmic components	C	GO:0022625|cytosolic large ribosomal subunit(IDA)	other intracellular components	C	GO:0005773|vacuole(IDA)	other cytoplasmic components	C	GO:0005886|plasma membrane(IDA)	plasma membrane	C	GO:0015934|large ribosomal subunit(TAS)	other intracellular components	C	GO:0022625|cytosolic large ribosomal subunit(IDA)	other cytoplasmic components	C	GO:0015934|large ribosomal subunit(ISS)	other intracellular components	P	GO:0006412|translation(ISS)	other cellular processes	C
AT2G17360	C	GO:0022627|cytosolic small ribosomal subunit(IDA)	other cytoplasmic components	F	GO:0003735|structural constituent of ribosome(ISS)	structural molecule activity	C	GO:0022627|cytosolic small ribosomal subunit(ISS)	other intracellular components	C	GO:0005774|vacuolar membrane(IDA)	other intracellular components	C	GO:0005886|plasma membrane(IDA)	plasma membrane	P	GO:0006412|translation(ISS)	other cellular processes	C	GO:0022627|cytosolic small ribosomal subunit(ISS)	cytosol	C	GO:0005737|cytoplasm(ISM)	other cytoplasmic components	C	GO:0022627|cytosolic small ribosomal subunit(ISS)	ribosome	P	GO:0006412|translation(ISS)	other metabolic processes	C	GO:0009507|chloroplast(IDA)	chloroplast	C	GO:0005774|vacuolar membrane(IDA)	other cytoplasmic components	P	GO:0001510|RNA methylation(RCA)	other cellular processes	C	GO:0022627|cytosolic small ribosomal subunit(IDA)	other intracellular components	P	GO:0001510|RNA methylation(RCA)	other metabolic processes	C	GO:0022627|cytosolic small ribosomal subunit(ISS)	other cytoplasmic components	C
AT4G30930	C	GO:0005840|ribosome(ISS)	ribosome	P	GO:0001510|RNA methylation(RCA)	other metabolic processes	P	GO:0006342|chromatin silencing(RCA)	other cellular processes	P	GO:0006412|translation(ISS)	protein metabolism	C	GO:0009507|chloroplast(ISM)	chloroplast	P	GO:0001510|RNA methylation(RCA)	other cellular processes	P	GO:0051567|histone H3-K9 methylation(RCA)	protein metabolism	P	GO:0016572|histone phosphorylation(RCA)	cell organization and biogenesis	P	GO:0009560|embryo sac egg cell differentiation(RCA)	other cellular processes	P	GO:0016572|histone phosphorylation(RCA)	other metabolic processes	P	GO:0016572|histone phosphorylation(RCA)	other cellular processes	P	GO:0006412|translation(ISS)	other cellular processes	P	GO:0006342|chromatin silencing(RCA)	other metabolic processes	P	GO:0051567|histone H3-K9 methylation(RCA)	other cellular processes	P	GO:0000741|karyogamy(IMP)	other cellular processes	P	GO:0009567|double fertilization forming a zygote and endosperm(IMP)	other biological processes	P
AT5G41680	C	GO:0005739|mitochondrion(ISM)	mitochondria	F	GO:0016301|kinase activity(ISS)	kinase activity	C	GO:0005739|mitochondrion(ISM)	mitochondria
AT1G79080	C	GO:0005739|mitochondrion(ISM)	mitochondria	P	GO:0008150|biological_process(ND)	unknown biological processes
AT5G53300	P	GO:0006511|ubiquitin-dependent protein catabolic process(TAS)	other cellular processes	F	GO:0031625|ubiquitin protein ligase binding(IPI)	protein binding	C	GO:0005737|cytoplasm(ISM)	other cytoplasmic components	P	GO:0006511|ubiquitin-dependent protein catabolic process(TAS)	protein metabolism	P	GO:0006511|ubiquitin-dependent protein catabolic process(TAS)	other metabolic processes	F	GO:0004842|ubiquitin-protein transferase activity(ISS)	transferase activity	F	GO:0004842|ubiquitin-protein transferase activity(IDA)	transferase activity	P	GO:0006511|ubiquitin-dependent protein catabolic process(IDA)	other cellular processes	P	GO:0006511|ubiquitin-dependent protein catabolic process(IDA)	protein metabolism	C	GO:0005737|cytoplasm(ISM)	other cytoplasmic components	P	GO:0006511|ubiquitin-dependent protein catabolic process(IDA)	other metabolic processes	C	GO:0005737|cytoplasm(ISM)	other cytoplasmic components
AT5G67590	F	GO:0008137|NADH dehydrogenase (ubiquinone) activity(ISS)	other enzyme activity	C	GO:0005739|mitochondrion(IDA)	mitochondria	C	GO:0005747|mitochondrial respiratory chain complex I(IDA)	mitochondria	P	GO:0006511|ubiquitin-dependent protein catabolic process(RCA)	other cellular processes	P	GO:0009853|photorespiration(RCA)	other metabolic processes	P	GO:0006096|glycolytic process(RCA)	other metabolic processes	P	GO:0009631|cold acclimation(IMP)	response to stress	C	GO:0005739|mitochondrion(IDA)	mitochondria	P	GO:0080129|proteasome core complex assembly(RCA)	cell organization and biogenesis	C	GO:0005739|mitochondrion(IDA)	mitochondria	P	GO:0046686|response to cadmium ion(RCA)	other biological processes	P	GO:0006096|glycolytic process(RCA)	other cellular processes	P	GO:0007030|Golgi organization(RCA)	other cellular processes	P	GO:0007030|Golgi organization(RCA)	cell organization and biogenesis	P	GO:0006511|ubiquitin-dependent protein catabolic process(RCA)	protein metabolism	P	GO:0006511|ubiquitin-dependent protein catabolic process(RCA)	other metabolic processes	P
AT5G57785	P	GO:0010224|response to UV-B(RCA)	response to abiotic or biotic stimulus	P	GO:0009813|flavonoid biosynthetic process(RCA)	other metabolic processes	P	GO:0009744|response to sucrose(RCA)	other biological processes	P	GO:0080167|response to karrikin(IEP)	response to abiotic or biotic stimulus	F	GO:0003674|molecular_function(ND)	unknown molecular functions	C	GO:0005739|mitochondrion(ISM)	mitochondria
AT5G08270	F	GO:0003674|molecular_function(ND)	unknown molecular functions	P	GO:0008150|biological_process(ND)	unknown biological processes	C	GO:0009507|chloroplast(ISM)	chloroplast
AT3G46430	C	GO:0005753|mitochondrial proton-transporting ATP synthase complex(IDA)	other intracellular components	P	GO:0008150|biological_process(ND)	unknown biological processes	C	GO:0005739|mitochondrion(IDA)	mitochondria	C	GO:0005750|mitochondrial respiratory chain complex III(IDA)	mitochondria	C	GO:0005750|mitochondrial respiratory chain complex III(IDA)	other membranes	C	GO:0005753|mitochondrial proton-transporting ATP synthase complex(IDA)	other cytoplasmic components	C	GO:0005753|mitochondrial proton-transporting ATP synthase complex(IDA)	other membranes	C	GO:0005750|mitochondrial respiratory chain complex III(IDA)	other intracellular components	C	GO:0005753|mitochondrial proton-transporting ATP synthase complex(IDA)	mitochondria	C	GO:0005750|mitochondrial respiratory chain complex III(IDA)	other cytoplasmic components	P	GO:0009853|photorespiration(RCA)	other cellular processes	P	GO:0009853|photorespiration(RCA)	other metabolic processes	F	GO:0003674|molecular_function(ND)	unknown molecular functions
AT5G59613	C	GO:0005753|mitochondrial proton-transporting ATP synthase complex(IDA)	other intracellular components	C	GO:0005750|mitochondrial respiratory chain complex III(IDA)	other intracellular components	C	GO:0005753|mitochondrial proton-transporting ATP synthase complex(IDA)	other membranes	P	GO:0008150|biological_process(ND)	unknown biological processes	F	GO:0003674|molecular_function(ND)	unknown molecular functions	C	GO:0005750|mitochondrial respiratory chain complex III(IDA)	other cytoplasmic components	C	GO:0005750|mitochondrial respiratory chain complex III(IDA)	mitochondria	C	GO:0005753|mitochondrial proton-transporting ATP synthase complex(IDA)	mitochondria	C	GO:0005750|mitochondrial respiratory chain complex III(IDA)	other membranes	C	GO:0005753|mitochondrial proton-transporting ATP synthase complex(IDA)	other cytoplasmic components
AT3G23940	C	GO:0009570|chloroplast stroma(IDA)	plastid	C	GO:0009507|chloroplast(IDA)	chloroplast	C	GO:0009570|chloroplast stroma(IDA)	plastid	C	GO:0009507|chloroplast(ISM)	chloroplast	C	GO:0009570|chloroplast stroma(IDA)	other cytoplasmic components	C	GO:0009570|chloroplast stroma(IDA)	other cytoplasmic components	C	GO:0009570|chloroplast stroma(IDA)	chloroplast	P	GO:0009555|pollen development(IMP)	developmental processes	F	GO:0005507|copper ion binding(IDA)	other binding	C	GO:0009507|chloroplast(IDA)	chloroplast	F	GO:0003824|catalytic activity(ISS)	other enzyme activity	P	GO:0009220|pyrimidine ribonucleotide biosynthetic process(RCA)	other cellular processes	C	GO:0009570|chloroplast stroma(IDA)	other intracellular components	C	GO:0009570|chloroplast stroma(IDA)	chloroplast	C	GO:0009536|plastid(IDA)	plastid	C	GO:0009570|chloroplast stroma(IDA)	other intracellular components	P
AT1G80550	C	GO:0005739|mitochondrion(ISM)	mitochondria	P	GO:0008150|biological_process(ND)	unknown biological processes
AT5G26860	C	GO:0005739|mitochondrion(IDA)	mitochondria	F	GO:0004252|serine-type endopeptidase activity(IBA)	hydrolase activity	P	GO:0007005|mitochondrion organization(IBA)	cell organization and biogenesis	P	GO:0034599|cellular response to oxidative stress(IBA)	response to stress	F	GO:0003697|single-stranded DNA binding(IBA)	DNA or RNA binding	F	GO:0005524|ATP binding(IDA)	nucleotide binding	P	GO:0006515|misfolded or incompletely synthesized protein catabolic process(IBA)	other cellular processes	C	GO:0005739|mitochondrion(IDA)	mitochondria	P	GO:0001666|response to hypoxia(IBA)	response to stress	P	GO:0051131|chaperone-mediated protein complex assembly(IBA)	cell organization and biogenesis	P	GO:0070407|oxidation-dependent protein catabolic process(IBA)	protein metabolism	P	GO:0001666|response to hypoxia(IBA)	response to abiotic or biotic stimulus	F	GO:0070361|mitochondrial light strand promoter anti-sense binding(IBA)	DNA or RNA binding	C	GO:0005739|mitochondrion(ISM)	mitochondria	C	GO:0005739|mitochondrion(IDA)	mitochondria	C	GO:0005829|cytosol(IDA)	cytosol	F
AT3G22300	F	GO:0003735|structural constituent of ribosome(ISS)	structural molecule activity	P	GO:0009220|pyrimidine ribonucleotide biosynthetic process(RCA)	other metabolic processes	C	GO:0005763|mitochondrial small ribosomal subunit(ISS)	mitochondria	C	GO:0015935|small ribosomal subunit(ISS)	other intracellular components	C	GO:0005763|mitochondrial small ribosomal subunit(ISS)	other cytoplasmic components	C	GO:0005763|mitochondrial small ribosomal subunit(ISS)	ribosome	P	GO:0006354|DNA-templated transcription, elongation(RCA)	transcription,DNA-dependent	P	GO:0006412|translation(ISS)	protein metabolism	P	GO:0006412|translation(ISS)	other cellular processes	P	GO:0006412|translation(ISS)	other metabolic processes	P	GO:0006412|translation(ISS)	other metabolic processes	P	GO:0006412|translation(ISS)	other cellular processes	P	GO:0006354|DNA-templated transcription, elongation(RCA)	other metabolic processes	P	GO:0009220|pyrimidine ribonucleotide biosynthetic process(RCA)	other cellular processes	C	GO:0015935|small ribosomal subunit(ISS)	ribosome	P	GO:0006354|DNA-templated transcription, elongation(RCA)	other cellular processes	P
AT2G28050	C	GO:0005739|mitochondrion(ISM)	mitochondria
AT3G48930	C	GO:0022627|cytosolic small ribosomal subunit(ISS)	cytosol	C	GO:0022626|cytosolic ribosome(IDA)	other cytoplasmic components	P	GO:0009793|embryo development ending in seed dormancy(NAS)	developmental processes	C	GO:0022626|cytosolic ribosome(IDA)	cytosol	P	GO:0006412|translation(ISS)	protein metabolism	C	GO:0022626|cytosolic ribosome(IDA)	ribosome	C	GO:0005737|cytoplasm(ISM)	other cytoplasmic components	C	GO:0022627|cytosolic small ribosomal subunit(IDA)	other cytoplasmic components	P	GO:0006412|translation(ISS)	other metabolic processes	C	GO:0022627|cytosolic small ribosomal subunit(ISS)	ribosome	C	GO:0022626|cytosolic ribosome(IDA)	ribosome	C	GO:0022626|cytosolic ribosome(IDA)	other cytoplasmic components	C	GO:0005618|cell wall(IDA)	cell wall	C	GO:0022627|cytosolic small ribosomal subunit(ISS)	other cytoplasmic components	C	GO:0022627|cytosolic small ribosomal subunit(IDA)	cytosol	C	GO:0022626|cytosolic ribosome(IDA)	cytosol	C
AT5G20980	F	GO:0003871|5-methyltetrahydropteroyltriglutamate-homocysteine S-methyltransferase activity(ISS)	transferase activity	P	GO:0009086|methionine biosynthetic process(ISS)	other cellular processes	C	GO:0009507|chloroplast(IDA)	chloroplast	C	GO:0009507|chloroplast(IDA)	chloroplast	F	GO:0008705|methionine synthase activity(IDA)	transferase activity	C	GO:0009507|chloroplast(IDA)	chloroplast	C	GO:0005829|cytosol(IDA)	cytosol	P	GO:0009086|methionine biosynthetic process(ISS)	other metabolic processes
AT4G30700	P	GO:0016554|cytidine to uridine editing(IMP)	other metabolic processes	C	GO:0005739|mitochondrion(IDA)	mitochondria	F	GO:0003674|molecular_function(ND)	unknown molecular functions	P	GO:0080156|mitochondrial mRNA modification(IMP)	other cellular processes	C	GO:0009507|chloroplast(IDA)	chloroplast	P	GO:0000963|mitochondrial RNA processing(IMP)	other cellular processes	P	GO:0000963|mitochondrial RNA processing(IMP)	cell organization and biogenesis	P	GO:0080156|mitochondrial mRNA modification(IMP)	other metabolic processes	P	GO:0016554|cytidine to uridine editing(IMP)	other cellular processes	P	GO:0000963|mitochondrial RNA processing(IMP)	other metabolic processes
AT3G06850	F	GO:0016407|acetyltransferase activity(IDA)	transferase activity	P	GO:0009750|response to fructose(RCA)	other biological processes	P	GO:0009744|response to sucrose(RCA)	other biological processes	P	GO:0009416|response to light stimulus(IEP)	response to abiotic or biotic stimulus	P	GO:0009744|response to sucrose(IEP)	other biological processes	P	GO:0043617|cellular response to sucrose starvation(IEP)	other cellular processes	F	GO:0008270|zinc ion binding(IDA)	other binding	P	GO:0009646|response to absence of light(IEP)	response to abiotic or biotic stimulus	P	GO:0009744|response to sucrose(IEP)	other biological processes	P	GO:0043617|cellular response to sucrose starvation(IEP)	response to stress	P	GO:0043617|cellular response to sucrose starvation(IEP)	other cellular processes	P	GO:0043617|cellular response to sucrose starvation(IEP)	response to stress	C	GO:0005739|mitochondrion(TAS)	mitochondria	F	GO:0004147|dihydrolipoamide branched chain acyltransferase activity(TAS)	transferase activity	C	GO:0005739|mitochondrion(ISM)	mitochondria	P	GO:0009646|response to absence of light(IEP)	response to abiotic or biotic stimulus	C
AT2G44525	F	GO:0003674|molecular_function(ND)	unknown molecular functions	P	GO:0008150|biological_process(ND)	unknown biological processes	C	GO:0005739|mitochondrion(ISM)	mitochondria
AT1G61400	F	GO:0016301|kinase activity(ISS)	kinase activity	F	GO:0030246|carbohydrate binding(ISS)	other binding	C	GO:0005886|plasma membrane(ISM)	plasma membrane
AT1G29710	C	GO:0005739|mitochondrion(ISM)	mitochondria	P	GO:0008150|biological_process(ND)	unknown biological processes	F	GO:0003674|molecular_function(ND)	unknown molecular functions
AT4G17010	P	GO:0008150|biological_process(ND)	unknown biological processes	F	GO:0003674|molecular_function(ND)	unknown molecular functions	C	GO:0005575|cellular_component(ND)	unknown cellular components
AT5G13660	F	GO:0003674|molecular_function(ND)	unknown molecular functions	C	GO:0005634|nucleus(ISM)	nucleus	C	GO:0005634|nucleus(ISM)	nucleus
AT4G26680	F	GO:0003674|molecular_function(ND)	unknown molecular functions	P	GO:0008150|biological_process(ND)	unknown biological processes	C	GO:0005739|mitochondrion(ISM)	mitochondria	C	GO:0005739|mitochondrion(ISM)	mitochondria
AT3G59760	C	GO:0009507|chloroplast(IDA)	chloroplast	F	GO:0005524|ATP binding(IDA)	nucleotide binding	C	GO:0009507|chloroplast(IDA)	chloroplast	P	GO:0009684|indoleacetic acid biosynthetic process(RCA)	other cellular processes	F	GO:0008270|zinc ion binding(IDA)	other binding	P	GO:0019344|cysteine biosynthetic process(IDA)	other metabolic processes	P	GO:0009627|systemic acquired resistance(RCA)	response to stress	F	GO:0005524|ATP binding(IDA)	other binding	F	GO:0005515|protein binding(IPI)	protein binding	P	GO:0048868|pollen tube development(IMP)	other biological processes	F	GO:0005524|ATP binding(IDA)	nucleotide binding	P	GO:0034976|response to endoplasmic reticulum stress(RCA)	other cellular processes	P	GO:0009567|double fertilization forming a zygote and endosperm(IGI)	other biological processes	F	GO:0005524|ATP binding(IDA)	nucleotide binding	P	GO:0009860|pollen tube growth(IGI)	cell organization and biogenesis	C	GO:0009507|chloroplast(IDA)	chloroplast	F
AT3G09810	P	GO:0006099|tricarboxylic acid cycle(TAS)	electron transport or energy pathways	C	GO:0005739|mitochondrion(ISM)	mitochondria	P	GO:0009749|response to glucose(RCA)	other biological processes	P	GO:0048767|root hair elongation(RCA)	developmental processes	P	GO:0043248|proteasome assembly(RCA)	cell organization and biogenesis	C	GO:0005739|mitochondrion(IDA)	mitochondria	P	GO:0006102|isocitrate metabolic process(IGI)	other cellular processes	F	GO:0004449|isocitrate dehydrogenase (NAD+) activity(ISS)	other enzyme activity	P	GO:0048767|root hair elongation(RCA)	other cellular processes	P	GO:0051788|response to misfolded protein(RCA)	response to stress	F	GO:0004449|isocitrate dehydrogenase (NAD+) activity(IGI)	other enzyme activity	P	GO:0006102|isocitrate metabolic process(IGI)	other metabolic processes	P	GO:0009744|response to sucrose(RCA)	other biological processes	P	GO:0006099|tricarboxylic acid cycle(TAS)	other metabolic processes	P	GO:0043161|proteasome-mediated ubiquitin-dependent protein catabolic process(RCA)	other metabolic processes	P	GO:0006099|tricarboxylic acid cycle(TAS)	other cellular processes	P
AT1G71850	P	GO:0009220|pyrimidine ribonucleotide biosynthetic process(RCA)	other cellular processes	C	GO:0005739|mitochondrion(IDA)	mitochondria	P	GO:0009220|pyrimidine ribonucleotide biosynthetic process(RCA)	other metabolic processes
AT1G71310	P	GO:0006281|DNA repair(IMP)	response to stress	C	GO:0005739|mitochondrion(IDA)	mitochondria	P	GO:0000724|double-strand break repair via homologous recombination(IMP)	other cellular processes	F	GO:0003690|double-stranded DNA binding(IDA)	DNA or RNA binding	P	GO:0006281|DNA repair(IMP)	other metabolic processes	C	GO:0005634|nucleus(IDA)	nucleus	F	GO:0005515|protein binding(IPI)	protein binding	F	GO:0003697|single-stranded DNA binding(IDA)	DNA or RNA binding	P	GO:0006281|DNA repair(IMP)	DNA or RNA metabolism	P	GO:0006281|DNA repair(IMP)	other cellular processes	P	GO:0000724|double-strand break repair via homologous recombination(IMP)	response to stress	P	GO:0000724|double-strand break repair via homologous recombination(IMP)	other metabolic processes	C	GO:0005739|mitochondrion(IDA)	mitochondria	F	GO:0050897|cobalt ion binding(IDA)	other binding	C	GO:0005739|mitochondrion(IDA)	mitochondria	C	GO:0005739|mitochondrion(IDA)	mitochondria	P
AT2G20490	C	GO:0005730|nucleolus(IDA)	other intracellular components	F	GO:0003723|RNA binding(ISS)	DNA or RNA binding	P	GO:0006364|rRNA processing(RCA)	other cellular processes	P	GO:0010197|polar nucleus fusion(IMP)	other cellular processes	P	GO:0001510|RNA methylation(RCA)	other metabolic processes	C	GO:0005634|nucleus(ISM)	nucleus	C	GO:0005730|nucleolus(IDA)	nucleus	C	GO:0015030|Cajal body(IDA)	nucleus	C	GO:0005634|nucleus(ISM)	nucleus	C	GO:0015030|Cajal body(IDA)	other intracellular components	P	GO:0010197|polar nucleus fusion(IMP)	developmental processes	P	GO:0010197|polar nucleus fusion(IMP)	cell organization and biogenesis	P	GO:0006364|rRNA processing(RCA)	other metabolic processes	C	GO:0005730|nucleolus(IDA)	nucleus	C	GO:0005730|nucleolus(IDA)	other intracellular components	P	GO:0001510|RNA methylation(RCA)	other cellular processes	C
AT4G24320	No annotation
AT5G27660	F	GO:0008236|serine-type peptidase activity(ISS)	hydrolase activity	P	GO:0006508|proteolysis(ISS)	protein metabolism	C	GO:0005576|extracellular region(ISM)	extracellular
AT4G39500	F	GO:0019825|oxygen binding(ISS)	other binding	P	GO:0009686|gibberellin biosynthetic process(RCA)	other cellular processes	P	GO:0009740|gibberellic acid mediated signaling pathway(RCA)	other cellular processes	P	GO:0009686|gibberellin biosynthetic process(RCA)	other metabolic processes	P	GO:0009740|gibberellic acid mediated signaling pathway(RCA)	signal transduction
AT2G20390	P	GO:0008150|biological_process(ND)	unknown biological processes	F	GO:0003674|molecular_function(ND)	unknown molecular functions	C	GO:0009507|chloroplast(ISM)	chloroplast	C	GO:0009507|chloroplast(ISM)	chloroplast
AT3G22470	P	GO:0008150|biological_process(ND)	unknown biological processes	F	GO:0003674|molecular_function(ND)	unknown molecular functions	C	GO:0005739|mitochondrion(ISM)	mitochondria
AT5G20290	C	GO:0022626|cytosolic ribosome(IDA)	ribosome	P	GO:0000462|maturation of SSU-rRNA from tricistronic rRNA transcript (SSU-rRNA, 5.8S rRNA, LSU-rRNA)(IBA)	other cellular processes	C	GO:0009507|chloroplast(IDA)	chloroplast	P	GO:0006412|translation(ISS)	other metabolic processes	C	GO:0005737|cytoplasm(ISM)	other cytoplasmic components	C	GO:0022627|cytosolic small ribosomal subunit(ISS)	ribosome	C	GO:0022626|cytosolic ribosome(IDA)	cytosol	F	GO:0003735|structural constituent of ribosome(ISS)	structural molecule activity	C	GO:0022626|cytosolic ribosome(IDA)	other cytoplasmic components	C	GO:0005730|nucleolus(IDA)	nucleus	C	GO:0005886|plasma membrane(IDA)	plasma membrane	C	GO:0022626|cytosolic ribosome(IDA)	other cytoplasmic components	C	GO:0016020|membrane(IDA)	other membranes	C	GO:0009507|chloroplast(IDA)	chloroplast	P	GO:0000462|maturation of SSU-rRNA from tricistronic rRNA transcript (SSU-rRNA, 5.8S rRNA, LSU-rRNA)(IBA)	other metabolic processes	C	GO:0005618|cell wall(IDA)	cell wall	P
AT3G61028	No annotation
AT5G53070	P	GO:0006412|translation(ISS)	other cellular processes	C	GO:0005840|ribosome(ISS)	ribosome	C	GO:0009507|chloroplast(ISM)	chloroplast	P	GO:0006412|translation(ISS)	protein metabolism	P	GO:0042254|ribosome biogenesis(ISS)	other biological processes	P	GO:0006412|translation(ISS)	other metabolic processes	F	GO:0003735|structural constituent of ribosome(ISS)	structural molecule activity
AT3G18880	C	GO:0022627|cytosolic small ribosomal subunit(ISS)	other intracellular components	P	GO:0006412|translation(ISS)	protein metabolism	P	GO:0006412|translation(ISS)	other metabolic processes	P	GO:0006354|DNA-templated transcription, elongation(RCA)	other cellular processes	C	GO:0022627|cytosolic small ribosomal subunit(ISS)	ribosome	F	GO:0003735|structural constituent of ribosome(ISS)	structural molecule activity	P	GO:0006354|DNA-templated transcription, elongation(RCA)	other metabolic processes	C	GO:0022627|cytosolic small ribosomal subunit(ISS)	cytosol	P	GO:0006412|translation(ISS)	other cellular processes	P	GO:0006354|DNA-templated transcription, elongation(RCA)	transcription,DNA-dependent	C	GO:0022627|cytosolic small ribosomal subunit(ISS)	other cytoplasmic components
AT5G50110	C	GO:0005737|cytoplasm(ISM)	other cytoplasmic components
AT3G43980	C	GO:0022627|cytosolic small ribosomal subunit(IDA)	other intracellular components	C	GO:0005840|ribosome(ISS)	ribosome	P	GO:0006412|translation(ISS)	protein metabolism	P	GO:0006412|translation(ISS)	other metabolic processes	P	GO:0006412|translation(ISS)	other cellular processes	C	GO:0022627|cytosolic small ribosomal subunit(IDA)	cytosol	C	GO:0022627|cytosolic small ribosomal subunit(IDA)	ribosome	C	GO:0022627|cytosolic small ribosomal subunit(IDA)	other cytoplasmic components	F	GO:0003735|structural constituent of ribosome(ISS)	structural molecule activity
AT3G44010	P	GO:0006412|translation(ISS)	other cellular processes	C	GO:0022627|cytosolic small ribosomal subunit(IDA)	other intracellular components	P	GO:0006412|translation(ISS)	other metabolic processes	C	GO:0022627|cytosolic small ribosomal subunit(IDA)	other cytoplasmic components	C	GO:0022627|cytosolic small ribosomal subunit(IDA)	ribosome	C	GO:0022627|cytosolic small ribosomal subunit(IDA)	cytosol	C	GO:0005840|ribosome(ISS)	ribosome	P	GO:0006412|translation(ISS)	protein metabolism	F	GO:0003735|structural constituent of ribosome(ISS)	structural molecule activity
AT4G33865	C	GO:0022627|cytosolic small ribosomal subunit(IDA)	cytosol	F	GO:0003735|structural constituent of ribosome(ISS)	structural molecule activity	C	GO:0022627|cytosolic small ribosomal subunit(IDA)	ribosome	P	GO:0006412|translation(ISS)	other metabolic processes	C	GO:0022627|cytosolic small ribosomal subunit(IDA)	other intracellular components	P	GO:0006412|translation(ISS)	protein metabolism	P	GO:0006412|translation(ISS)	other cellular processes	C	GO:0005840|ribosome(ISS)	ribosome	C	GO:0022627|cytosolic small ribosomal subunit(IDA)	other cytoplasmic components
AT2G07785	C	GO:0016020|membrane(IDA)	other membranes	C	GO:0005886|plasma membrane(ISM)	plasma membrane
AT2G20585	F	GO:0003674|molecular_function(ND)	unknown molecular functions
AT4G37170	C	GO:0005739|mitochondrion(ISM)	mitochondria	P	GO:0008150|biological_process(ND)	unknown biological processes	F	GO:0003674|molecular_function(ND)	unknown molecular functions
AT3G02790	P	GO:0006355|regulation of transcription, DNA-templated(TAS)	other cellular processes	C	GO:0005737|cytoplasm(IDA)	other cytoplasmic components	P	GO:0006355|regulation of transcription, DNA-templated(TAS)	other metabolic processes	C	GO:0005634|nucleus(IDA)	nucleus	P	GO:0071452|cellular response to singlet oxygen(IMP)	response to stress	P	GO:0071452|cellular response to singlet oxygen(IMP)	other cellular processes	F	GO:0003700|sequence-specific DNA binding transcription factor activity(ISS)	transcription factor activity	P	GO:0006355|regulation of transcription, DNA-templated(TAS)	transcription,DNA-dependent
AT3G16480	C	GO:0005741|mitochondrial outer membrane(IDA)	mitochondria	C	GO:0005750|mitochondrial respiratory chain complex III(IDA)	other cytoplasmic components	C	GO:0005743|mitochondrial inner membrane(IDA)	mitochondria	C	GO:0005739|mitochondrion(ISM)	mitochondria	C	GO:0005750|mitochondrial respiratory chain complex III(IDA)	mitochondria	C	GO:0009507|chloroplast(IDA)	chloroplast	C	GO:0005741|mitochondrial outer membrane(IDA)	other cytoplasmic components	F	GO:0004222|metalloendopeptidase activity(ISS)	hydrolase activity	C	GO:0005774|vacuolar membrane(IDA)	other membranes	C	GO:0005759|mitochondrial matrix(IDA)	other intracellular components	C	GO:0005739|mitochondrion(IDA)	mitochondria	C	GO:0005743|mitochondrial inner membrane(IDA)	other membranes	C	GO:0005743|mitochondrial inner membrane(IDA)	other intracellular components	C	GO:0005758|mitochondrial intermembrane space(IDA)	other cytoplasmic components	C	GO:0005739|mitochondrion(IDA)	mitochondria	P	GO:0006511|ubiquitin-dependent protein catabolic process(RCA)	protein metabolism	C
AT2G35070	P	GO:0009555|pollen development(IMP)	developmental processes	F	GO:0003674|molecular_function(ND)	unknown molecular functions	C	GO:0009507|chloroplast(ISM)	chloroplast	P	GO:0048868|pollen tube development(IMP)	other biological processes
AT1G77750	C	GO:0005739|mitochondrion(ISM)	mitochondria	C	GO:0005739|mitochondrion(IDA)	mitochondria	C	GO:0005763|mitochondrial small ribosomal subunit(TAS)	mitochondria	C	GO:0015935|small ribosomal subunit(ISS)	other intracellular components	F	GO:0003735|structural constituent of ribosome(ISS)	structural molecule activity	C	GO:0015935|small ribosomal subunit(ISS)	ribosome	P	GO:0006412|translation(ISS)	protein metabolism	P	GO:0006412|translation(ISS)	other metabolic processes	P	GO:0006354|DNA-templated transcription, elongation(RCA)	transcription,DNA-dependent	C	GO:0015935|small ribosomal subunit(ISS)	other cytoplasmic components	P	GO:0006354|DNA-templated transcription, elongation(RCA)	other cellular processes	C	GO:0005763|mitochondrial small ribosomal subunit(TAS)	ribosome	C	GO:0005763|mitochondrial small ribosomal subunit(TAS)	other intracellular components	P	GO:0006354|DNA-templated transcription, elongation(RCA)	other metabolic processes	P	GO:0006412|translation(ISS)	other cellular processes	C	GO:0005763|mitochondrial small ribosomal subunit(TAS)	other cytoplasmic components	P
AT2G14095	F	GO:0003674|molecular_function(ND)	unknown molecular functions	P	GO:0008150|biological_process(ND)	unknown biological processes
AT2G21290	P	GO:0008150|biological_process(ND)	unknown biological processes	C	GO:0005739|mitochondrion(ISM)	mitochondria	F	GO:0003674|molecular_function(ND)	unknown molecular functions
AT3G61520	P	GO:0008150|biological_process(ND)	unknown biological processes	F	GO:0003674|molecular_function(ND)	unknown molecular functions	C	GO:0005739|mitochondrion(ISM)	mitochondria
AT2G04340	F	GO:0003674|molecular_function(ND)	unknown molecular functions	P	GO:0008150|biological_process(ND)	unknown biological processes	C	GO:0005739|mitochondrion(ISM)	mitochondria
AT3G51940	F	GO:0003674|molecular_function(ND)	unknown molecular functions	C	GO:0005634|nucleus(ISM)	nucleus	P	GO:0008150|biological_process(ND)	unknown biological processes
AT1G03100	C	GO:0005739|mitochondrion(ISM)	mitochondria	F	GO:0003674|molecular_function(ND)	unknown molecular functions	P	GO:0008150|biological_process(ND)	unknown biological processes
AT3G57700	P	GO:0050832|defense response to fungus(RCA)	response to abiotic or biotic stimulus	P	GO:0009697|salicylic acid biosynthetic process(RCA)	other metabolic processes	P	GO:0000165|MAPK cascade(RCA)	other metabolic processes	P	GO:0042742|defense response to bacterium(RCA)	response to stress	P	GO:0010310|regulation of hydrogen peroxide metabolic process(RCA)	other cellular processes	C	GO:0005634|nucleus(ISM)	nucleus	P	GO:0009862|systemic acquired resistance, salicylic acid mediated signaling pathway(RCA)	other cellular processes	P	GO:0009862|systemic acquired resistance, salicylic acid mediated signaling pathway(RCA)	response to stress	P	GO:0045088|regulation of innate immune response(RCA)	response to stress	P	GO:0000165|MAPK cascade(RCA)	other cellular processes	P	GO:0042742|defense response to bacterium(RCA)	response to abiotic or biotic stimulus	P	GO:0031348|negative regulation of defense response(RCA)	response to stress	P	GO:0010310|regulation of hydrogen peroxide metabolic process(RCA)	other metabolic processes	P	GO:0050832|defense response to fungus(RCA)	response to stress	P	GO:0009862|systemic acquired resistance, salicylic acid mediated signaling pathway(RCA)	signal transduction	F	GO:0016301|kinase activity(ISS)	kinase activity	P
AT1G07220	P	GO:0008150|biological_process(ND)	unknown biological processes
AT5G02050	P	GO:0001510|RNA methylation(RCA)	other metabolic processes	P	GO:0009220|pyrimidine ribonucleotide biosynthetic process(RCA)	other metabolic processes	P	GO:0008150|biological_process(ND)	unknown biological processes	P	GO:0001510|RNA methylation(RCA)	other cellular processes	C	GO:0005759|mitochondrial matrix(ISS)	other cytoplasmic components	C	GO:0005739|mitochondrion(ISM)	mitochondria	C	GO:0005739|mitochondrion(IDA)	mitochondria	C	GO:0005759|mitochondrial matrix(ISS)	other intracellular components	C	GO:0005759|mitochondrial matrix(ISS)	mitochondria	P	GO:0009220|pyrimidine ribonucleotide biosynthetic process(RCA)	other cellular processes
AT5G46680	F	GO:0003674|molecular_function(ND)	unknown molecular functions	P	GO:0008150|biological_process(ND)	unknown biological processes	C	GO:0005739|mitochondrion(ISM)	mitochondria
AT5G42965	C	GO:0005739|mitochondrion(ISM)	mitochondria
AT3G62460	C	GO:0009507|chloroplast(ISM)	chloroplast	C	GO:0005739|mitochondrion(IDA)	mitochondria	P	GO:0008150|biological_process(ND)	unknown biological processes
AT5G67510	C	GO:0022626|cytosolic ribosome(IDA)	cytosol	C	GO:0015934|large ribosomal subunit(ISS)	ribosome	C	GO:0022625|cytosolic large ribosomal subunit(IDA)	other cytoplasmic components	C	GO:0015934|large ribosomal subunit(ISS)	other intracellular components	C	GO:0009507|chloroplast(ISM)	chloroplast	F	GO:0005515|protein binding(IPI)	protein binding	C	GO:0022626|cytosolic ribosome(IDA)	other intracellular components	C	GO:0022625|cytosolic large ribosomal subunit(IDA)	cytosol	C	GO:0022626|cytosolic ribosome(IDA)	other cytoplasmic components	C	GO:0022625|cytosolic large ribosomal subunit(IDA)	ribosome	P	GO:0006412|translation(ISS)	other metabolic processes	C	GO:0022626|cytosolic ribosome(IDA)	ribosome	P	GO:0006412|translation(ISS)	protein metabolism	F	GO:0003735|structural constituent of ribosome(ISS)	structural molecule activity	P	GO:0006412|translation(ISS)	other cellular processes	C	GO:0022625|cytosolic large ribosomal subunit(IDA)	other intracellular components	C
AT4G23900	F	GO:0008270|zinc ion binding(IDA)	other binding	F	GO:0004550|nucleoside diphosphate kinase activity(ISS)	kinase activity	F	GO:0004550|nucleoside diphosphate kinase activity(ISS)	transferase activity	C	GO:0009507|chloroplast(ISM)	chloroplast	F	GO:0005524|ATP binding(ISS)	other binding	F	GO:0005524|ATP binding(ISS)	nucleotide binding	C	GO:0005739|mitochondrion(IDA)	mitochondria
AT3G15534	C	GO:0005576|extracellular region(ISM)	extracellular	F	GO:0003674|molecular_function(ND)	unknown molecular functions	P	GO:0008150|biological_process(ND)	unknown biological processes
AT1G12120	F	GO:0003674|molecular_function(ND)	unknown molecular functions	P	GO:0008150|biological_process(ND)	unknown biological processes	P	GO:0051049|regulation of transport(RCA)	transport	C	GO:0005634|nucleus(ISM)	nucleus
AT1G62680	C	GO:0005739|mitochondrion(ISM)	mitochondria
AT1G47271	C	GO:0005739|mitochondrion(ISM)	mitochondria	P	GO:0008150|biological_process(ND)	unknown biological processes
AT1G33350	C	GO:0005739|mitochondrion(ISM)	mitochondria
AT1G63940	C	GO:0005739|mitochondrion(IDA)	mitochondria	C	GO:0009507|chloroplast(IDA)	chloroplast	F	GO:0005524|ATP binding(IDA)	nucleotide binding	C	GO:0009570|chloroplast stroma(IDA)	chloroplast	C	GO:0009570|chloroplast stroma(IDA)	plastid	C	GO:0009570|chloroplast stroma(IDA)	plastid	C	GO:0009570|chloroplast stroma(IDA)	chloroplast	C	GO:0009570|chloroplast stroma(IDA)	other intracellular components	C	GO:0009570|chloroplast stroma(IDA)	plastid	F	GO:0005524|ATP binding(IDA)	other binding	F	GO:0005524|ATP binding(IDA)	other binding	C	GO:0005739|mitochondrion(IDA)	mitochondria	C	GO:0009507|chloroplast(IDA)	chloroplast	C	GO:0005739|mitochondrion(IDA)	mitochondria	P	GO:0009409|response to cold(IEP)	response to abiotic or biotic stimulus	C	GO:0010319|stromule(IDA)	plastid	F
AT3G10860	F	GO:0008121|ubiquinol-cytochrome-c reductase activity(ISS)	other enzyme activity	C	GO:0005739|mitochondrion(IDA)	mitochondria	F	GO:0008121|ubiquinol-cytochrome-c reductase activity(ISS)	transporter activity	C	GO:0016020|membrane(IDA)	other membranes	C	GO:0005750|mitochondrial respiratory chain complex III(IDA)	other membranes	C	GO:0005739|mitochondrion(ISM)	mitochondria	P	GO:0009853|photorespiration(RCA)	other metabolic processes	C	GO:0005750|mitochondrial respiratory chain complex III(IDA)	other cytoplasmic components	C	GO:0005750|mitochondrial respiratory chain complex III(IDA)	other intracellular components	C	GO:0005750|mitochondrial respiratory chain complex III(IDA)	mitochondria	P	GO:0009853|photorespiration(RCA)	other cellular processes
AT3G13226	P	GO:0006282|regulation of DNA repair(ISS)	DNA or RNA metabolism	P	GO:0006282|regulation of DNA repair(ISS)	response to stress	P	GO:0006282|regulation of DNA repair(ISS)	other metabolic processes	P	GO:0007126|meiotic nuclear division(RCA)	cell organization and biogenesis	C	GO:0005737|cytoplasm(ISM)	other cytoplasmic components	F	GO:0003674|molecular_function(ND)	unknown molecular functions	P	GO:0006282|regulation of DNA repair(ISS)	other cellular processes	P	GO:0007126|meiotic nuclear division(RCA)	other cellular processes
AT5G50850	P	GO:0042742|defense response to bacterium(IEP)	response to abiotic or biotic stimulus	P	GO:0006096|glycolytic process(RCA)	other cellular processes	P	GO:0009744|response to sucrose(RCA)	other biological processes	P	GO:0009750|response to fructose(RCA)	other biological processes	P	GO:0006096|glycolytic process(RCA)	other metabolic processes	P	GO:0009060|aerobic respiration(RCA)	other cellular processes	C	GO:0005774|vacuolar membrane(IDA)	other membranes	C	GO:0005739|mitochondrion(IDA)	mitochondria	C	GO:0005739|mitochondrion(IDA)	mitochondria	P	GO:0006096|glycolytic process(RCA)	electron transport or energy pathways	P	GO:0009060|aerobic respiration(RCA)	other metabolic processes	P	GO:0019722|calcium-mediated signaling(RCA)	signal transduction	C	GO:0005774|vacuolar membrane(IDA)	other intracellular components	F	GO:0004739|pyruvate dehydrogenase (acetyl-transferring) activity(ISS)	other enzyme activity	P	GO:0009060|aerobic respiration(RCA)	electron transport or energy pathways	C	GO:0005739|mitochondrion(IDA)	mitochondria	C
AT5G18380	C	GO:0022627|cytosolic small ribosomal subunit(ISS)	cytosol	C	GO:0009507|chloroplast(IDA)	chloroplast	C	GO:0009507|chloroplast(IDA)	chloroplast	C	GO:0022627|cytosolic small ribosomal subunit(ISS)	other cytoplasmic components	C	GO:0022627|cytosolic small ribosomal subunit(ISS)	other intracellular components	P	GO:0006412|translation(ISS)	protein metabolism	P	GO:0006412|translation(ISS)	other metabolic processes	F	GO:0003735|structural constituent of ribosome(ISS)	structural molecule activity	C	GO:0022627|cytosolic small ribosomal subunit(IDA)	ribosome	C	GO:0009507|chloroplast(ISM)	chloroplast	C	GO:0022627|cytosolic small ribosomal subunit(ISS)	ribosome	C	GO:0009506|plasmodesma(IDA)	other cellular components	C	GO:0005737|cytoplasm(ISM)	other cytoplasmic components	C	GO:0005737|cytoplasm(ISM)	other cytoplasmic components	P	GO:0006412|translation(ISS)	other cellular processes	C	GO:0022627|cytosolic small ribosomal subunit(IDA)	other cytoplasmic components	C
AT3G08950	P	GO:0008535|respiratory chain complex IV assembly(ISS)	cell organization and biogenesis	C	GO:0005739|mitochondrion(ISM)	mitochondria	P	GO:0019243|methylglyoxal catabolic process to D-lactate(RCA)	other cellular processes	C	GO:0005739|mitochondrion(IDA)	mitochondria	P	GO:0033617|mitochondrial respiratory chain complex IV assembly(IMP)	other cellular processes	P	GO:0006626|protein targeting to mitochondrion(RCA)	transport	F	GO:0005507|copper ion binding(IDA)	other binding	P	GO:0006626|protein targeting to mitochondrion(RCA)	cell organization and biogenesis	P	GO:0006626|protein targeting to mitochondrion(RCA)	other cellular processes	P	GO:0019243|methylglyoxal catabolic process to D-lactate(RCA)	other metabolic processes	P	GO:0033617|mitochondrial respiratory chain complex IV assembly(IMP)	cell organization and biogenesis
AT1G08300	F	GO:0003674|molecular_function(ND)	unknown molecular functions	P	GO:0008150|biological_process(ND)	unknown biological processes
AT2G35040	C	GO:0009570|chloroplast stroma(IDA)	chloroplast	C	GO:0009507|chloroplast(IDA)	chloroplast	P	GO:0006164|purine nucleotide biosynthetic process(ISS)	other metabolic processes	C	GO:0009570|chloroplast stroma(IDA)	other intracellular components	C	GO:0009570|chloroplast stroma(IDA)	other cytoplasmic components	C	GO:0010319|stromule(IDA)	plastid	P	GO:0009220|pyrimidine ribonucleotide biosynthetic process(RCA)	other metabolic processes	C	GO:0009570|chloroplast stroma(IDA)	plastid	P	GO:0006164|purine nucleotide biosynthetic process(ISS)	other cellular processes	C	GO:0009570|chloroplast stroma(IDA)	chloroplast	P	GO:0009409|response to cold(IEP)	response to stress	F	GO:0004643|phosphoribosylaminoimidazolecarboxamide formyltransferase activity(ISS)	transferase activity	P	GO:0009409|response to cold(IEP)	response to abiotic or biotic stimulus	F	GO:0003937|IMP cyclohydrolase activity(ISS)	hydrolase activity	P	GO:0009220|pyrimidine ribonucleotide biosynthetic process(RCA)	other cellular processes	C	GO:0009507|chloroplast(ISM)	chloroplast	C
AT2G17130	F	GO:0004449|isocitrate dehydrogenase (NAD+) activity(IMP)	other enzyme activity	P	GO:0007033|vacuole organization(RCA)	cell organization and biogenesis	P	GO:0007033|vacuole organization(RCA)	other cellular processes	P	GO:0006099|tricarboxylic acid cycle(TAS)	other metabolic processes	P	GO:0006099|tricarboxylic acid cycle(TAS)	electron transport or energy pathways	P	GO:0006099|tricarboxylic acid cycle(TAS)	other cellular processes	P	GO:0007030|Golgi organization(RCA)	cell organization and biogenesis	P	GO:0007030|Golgi organization(RCA)	other cellular processes	P	GO:0006102|isocitrate metabolic process(IMP)	other metabolic processes	P	GO:0009853|photorespiration(RCA)	other metabolic processes	P	GO:0009853|photorespiration(RCA)	other cellular processes	P	GO:0006102|isocitrate metabolic process(IMP)	other cellular processes	C	GO:0005739|mitochondrion(IDA)	mitochondria	F	GO:0004449|isocitrate dehydrogenase (NAD+) activity(ISS)	other enzyme activity	P	GO:0008152|metabolic process(ISS)	other metabolic processes	C	GO:0005739|mitochondrion(ISM)	mitochondria	C
AT1G48850	C	GO:0005730|nucleolus(IDA)	nucleus	C	GO:0009570|chloroplast stroma(IDA)	other intracellular components	C	GO:0009507|chloroplast(ISM)	chloroplast	C	GO:0009507|chloroplast(ISM)	chloroplast	C	GO:0009507|chloroplast(IDA)	chloroplast	P	GO:0006499|N-terminal protein myristoylation(RCA)	protein metabolism	P	GO:0009805|coumarin biosynthetic process(RCA)	other metabolic processes	C	GO:0009570|chloroplast stroma(IDA)	other cytoplasmic components	C	GO:0009570|chloroplast stroma(IDA)	chloroplast	C	GO:0009570|chloroplast stroma(IDA)	plastid	P	GO:0009073|aromatic amino acid family biosynthetic process(TAS)	other cellular processes	C	GO:0009507|chloroplast(IDA)	chloroplast	C	GO:0005730|nucleolus(IDA)	nucleus	C	GO:0005730|nucleolus(IDA)	other intracellular components	C	GO:0005730|nucleolus(IDA)	nucleus	C	GO:0009507|chloroplast(ISM)	chloroplast	P
AT3G27130	F	GO:0003674|molecular_function(ND)	unknown molecular functions	C	GO:0005575|cellular_component(ND)	unknown cellular components	P	GO:0008150|biological_process(ND)	unknown biological processes
AT3G10920	P	GO:0006511|ubiquitin-dependent protein catabolic process(RCA)	other metabolic processes	P	GO:0009651|response to salt stress(IEP)	response to abiotic or biotic stimulus	C	GO:0005739|mitochondrion(ISM)	mitochondria	P	GO:0009651|response to salt stress(IEP)	response to stress	P	GO:0019430|removal of superoxide radicals(IC)	response to stress	P	GO:0009266|response to temperature stimulus(RCA)	response to abiotic or biotic stimulus	P	GO:0009651|response to salt stress(RCA)	response to stress	P	GO:0006096|glycolytic process(RCA)	other cellular processes	P	GO:0007030|Golgi organization(RCA)	other cellular processes	P	GO:0009060|aerobic respiration(RCA)	electron transport or energy pathways	P	GO:0042742|defense response to bacterium(IEP)	response to abiotic or biotic stimulus	P	GO:0009651|response to salt stress(IEP)	response to abiotic or biotic stimulus	P	GO:0019430|removal of superoxide radicals(IC)	other cellular processes	P	GO:0009853|photorespiration(RCA)	other cellular processes	P	GO:0006511|ubiquitin-dependent protein catabolic process(RCA)	other cellular processes	P	GO:0051788|response to misfolded protein(RCA)	response to stress	F
AT4G17310	C	GO:0005739|mitochondrion(ISM)	mitochondria	C	GO:0005739|mitochondrion(ISM)	mitochondria
AT2G35090	P	GO:0008150|biological_process(ND)	unknown biological processes	F	GO:0003674|molecular_function(ND)	unknown molecular functions
AT1G79530	F	GO:0005507|copper ion binding(IDA)	other binding	P	GO:0006096|glycolytic process(ISS)	other cellular processes	F	GO:0008270|zinc ion binding(IDA)	other binding	C	GO:0009536|plastid(ISS)	plastid	C	GO:0009507|chloroplast(ISM)	chloroplast	P	GO:0009735|response to cytokinin(IDA)	other biological processes	P	GO:0080144|amino acid homeostasis(IMP)	other biological processes	F	GO:0004365|glyceraldehyde-3-phosphate dehydrogenase (NAD+) (phosphorylating) activity(IMP)	other enzyme activity	P	GO:0006096|glycolytic process(ISS)	other metabolic processes	C	GO:0009536|plastid(IDA)	plastid	P	GO:0048658|anther wall tapetum development(IMP)	developmental processes	P	GO:0009555|pollen development(IMP)	developmental processes	P	GO:0080022|primary root development(IMP)	developmental processes	C	GO:0016020|membrane(IDA)	other membranes	P	GO:0005975|carbohydrate metabolic process(IMP)	other metabolic processes	P	GO:0006096|glycolytic process(ISS)	electron transport or energy pathways
AT4G19191	P	GO:0008150|biological_process(ND)	unknown biological processes	C	GO:0005739|mitochondrion(ISM)	mitochondria	F	GO:0003674|molecular_function(ND)	unknown molecular functions
AT2G37530	C	GO:0005739|mitochondrion(ISM)	mitochondria
AT2G45270	P	GO:0006508|proteolysis(ISS)	protein metabolism	C	GO:0005743|mitochondrial inner membrane(IDA)	other membranes	C	GO:0005743|mitochondrial inner membrane(IDA)	other intracellular components	P	GO:0016556|mRNA modification(RCA)	other cellular processes	C	GO:0009507|chloroplast(ISM)	chloroplast	C	GO:0005743|mitochondrial inner membrane(IDA)	other cytoplasmic components	C	GO:0005743|mitochondrial inner membrane(IDA)	mitochondria	P	GO:0016556|mRNA modification(RCA)	other metabolic processes
AT4G35905	P	GO:0008150|biological_process(ND)	unknown biological processes	C	GO:0005739|mitochondrion(ISM)	mitochondria	F	GO:0003674|molecular_function(ND)	unknown molecular functions
AT3G57430	C	GO:0009507|chloroplast(IDA)	chloroplast	P	GO:0031425|chloroplast RNA processing(IMP)	other metabolic processes	P	GO:0031425|chloroplast RNA processing(IMP)	other cellular processes	C	GO:0009507|chloroplast(ISM)	chloroplast
AT2G29350	P	GO:0002213|defense response to insect(IEP)	response to abiotic or biotic stimulus	C	GO:0009507|chloroplast(ISM)	chloroplast	F	GO:0016491|oxidoreductase activity(ISS)	other enzyme activity	P	GO:0002213|defense response to insect(IEP)	response to stress	P	GO:0007568|aging(RCA)	other biological processes	P	GO:0007568|aging(IEP)	other biological processes	F	GO:0004022|alcohol dehydrogenase (NAD) activity(TAS)	other enzyme activity
AT5G15010	C	GO:0005739|mitochondrion(ISM)	mitochondria	F	GO:0003674|molecular_function(ND)	unknown molecular functions	P	GO:0008150|biological_process(ND)	unknown biological processes
AT2G37890	C	GO:0005743|mitochondrial inner membrane(ISS)	mitochondria	C	GO:0005743|mitochondrial inner membrane(ISS)	other cytoplasmic components	C	GO:0005743|mitochondrial inner membrane(ISS)	other membranes	P	GO:0006810|transport(ISS)	transport	C	GO:0005743|mitochondrial inner membrane(ISS)	other intracellular components	P	GO:0006839|mitochondrial transport(ISS)	transport	C	GO:0005739|mitochondrion(ISM)	mitochondria	F	GO:0005215|transporter activity(ISS)	transporter activity
AT2G09990	C	GO:0022627|cytosolic small ribosomal subunit(ISS)	cytosol	C	GO:0022626|cytosolic ribosome(IDA)	other cytoplasmic components	P	GO:0006412|translation(ISS)	other metabolic processes	C	GO:0022626|cytosolic ribosome(IDA)	cytosol	C	GO:0022626|cytosolic ribosome(IDA)	cytosol	C	GO:0022627|cytosolic small ribosomal subunit(ISS)	ribosome	C	GO:0005829|cytosol(IDA)	cytosol	P	GO:0006412|translation(ISS)	other cellular processes	C	GO:0022626|cytosolic ribosome(IDA)	other intracellular components	C	GO:0022627|cytosolic small ribosomal subunit(IDA)	cytosol	C	GO:0022627|cytosolic small ribosomal subunit(IDA)	other cytoplasmic components	C	GO:0022627|cytosolic small ribosomal subunit(IDA)	ribosome	C	GO:0009507|chloroplast(IDA)	chloroplast	C	GO:0016020|membrane(IDA)	other membranes	C	GO:0022626|cytosolic ribosome(IDA)	other cytoplasmic components	C	GO:0022626|cytosolic ribosome(IDA)	ribosome	C
AT5G58420	C	GO:0022627|cytosolic small ribosomal subunit(IDA)	other cytoplasmic components	C	GO:0022626|cytosolic ribosome(IDA)	cytosol	C	GO:0005737|cytoplasm(ISM)	other cytoplasmic components	C	GO:0022627|cytosolic small ribosomal subunit(ISS)	other cytoplasmic components	P	GO:0006412|translation(ISS)	other metabolic processes	C	GO:0022626|cytosolic ribosome(IDA)	other cytoplasmic components	C	GO:0005730|nucleolus(IDA)	other intracellular components	C	GO:0022627|cytosolic small ribosomal subunit(IDA)	other intracellular components	C	GO:0022626|cytosolic ribosome(IDA)	other intracellular components	P	GO:0001510|RNA methylation(RCA)	other metabolic processes	C	GO:0022626|cytosolic ribosome(IDA)	cytosol	C	GO:0022627|cytosolic small ribosomal subunit(IDA)	cytosol	C	GO:0022626|cytosolic ribosome(IDA)	other intracellular components	C	GO:0005829|cytosol(IDA)	cytosol	C	GO:0005730|nucleolus(IDA)	nucleus	C	GO:0022626|cytosolic ribosome(IDA)	ribosome	C
AT3G17910	C	GO:0005739|mitochondrion(ISM)	mitochondria	F	GO:0003674|molecular_function(ND)	unknown molecular functions	F	GO:0003674|molecular_function(ND)	unknown molecular functions	P	GO:0008535|respiratory chain complex IV assembly(ISS)	cell organization and biogenesis	C	GO:0005739|mitochondrion(IDA)	mitochondria	C	GO:0005739|mitochondrion(IDA)	mitochondria
AT5G23740	P	GO:0006412|translation(ISS)	other metabolic processes	C	GO:0022627|cytosolic small ribosomal subunit(ISS)	other intracellular components	P	GO:0006412|translation(ISS)	protein metabolism	C	GO:0022627|cytosolic small ribosomal subunit(ISS)	ribosome	C	GO:0022627|cytosolic small ribosomal subunit(ISS)	other cytoplasmic components	C	GO:0016020|membrane(IDA)	other membranes	P	GO:0006412|translation(ISS)	other cellular processes	F	GO:0003735|structural constituent of ribosome(ISS)	structural molecule activity	C	GO:0022627|cytosolic small ribosomal subunit(ISS)	cytosol	C	GO:0005737|cytoplasm(ISM)	other cytoplasmic components
AT2G07640	No annotation
AT1G62085	C	GO:0005739|mitochondrion(ISM)	mitochondria
AT1G69290	P	GO:0008150|biological_process(ND)	unknown biological processes	F	GO:0003674|molecular_function(ND)	unknown molecular functions	C	GO:0005739|mitochondrion(ISM)	mitochondria
AT3G55640	P	GO:0006810|transport(ISS)	transport	C	GO:0005739|mitochondrion(ISM)	mitochondria	C	GO:0005743|mitochondrial inner membrane(ISS)	other cytoplasmic components	F	GO:0005215|transporter activity(ISS)	transporter activity	C	GO:0005743|mitochondrial inner membrane(ISS)	mitochondria	C	GO:0005743|mitochondrial inner membrane(ISS)	other membranes	P	GO:0006839|mitochondrial transport(ISS)	transport	C	GO:0005886|plasma membrane(IDA)	plasma membrane	C	GO:0005743|mitochondrial inner membrane(ISS)	other intracellular components
AT3G57785	F	GO:0003674|molecular_function(ND)	unknown molecular functions	C	GO:0005747|mitochondrial respiratory chain complex I(IDA)	other membranes	C	GO:0009507|chloroplast(ISM)	chloroplast	C	GO:0005739|mitochondrion(IDA)	mitochondria	C	GO:0005747|mitochondrial respiratory chain complex I(IDA)	other cytoplasmic components	C	GO:0005747|mitochondrial respiratory chain complex I(IDA)	other intracellular components	C	GO:0005739|mitochondrion(IDA)	mitochondria	C	GO:0005747|mitochondrial respiratory chain complex I(IDA)	mitochondria	P	GO:0008150|biological_process(ND)	unknown biological processes	C	GO:0005747|mitochondrial respiratory chain complex I(IDA)	other cytoplasmic components	C	GO:0005747|mitochondrial respiratory chain complex I(IDA)	other membranes	C	GO:0005747|mitochondrial respiratory chain complex I(IDA)	other intracellular components	C	GO:0005747|mitochondrial respiratory chain complex I(IDA)	mitochondria
AT5G41685	F	GO:0008565|protein transporter activity(ISS)	transporter activity
AT4G32400	P	GO:0006810|transport(ISS)	transport	P	GO:0006888|ER to Golgi vesicle-mediated transport(RCA)	transport	P	GO:0006820|anion transport(RCA)	transport	C	GO:0009941|chloroplast envelope(IDA)	other intracellular components	P	GO:0006612|protein targeting to membrane(RCA)	cell organization and biogenesis	P	GO:0006862|nucleotide transport(RCA)	transport	C	GO:0005739|mitochondrion(IDA)	mitochondria	C	GO:0005739|mitochondrion(ISM)	mitochondria	P	GO:0006862|nucleotide transport(IGI)	transport	P	GO:0015696|ammonium transport(RCA)	transport	P	GO:0006839|mitochondrial transport(ISS)	transport	P	GO:0010363|regulation of plant-type hypersensitive response(RCA)	other cellular processes	F	GO:0015215|nucleotide transmembrane transporter activity(IGI)	transporter activity	F	GO:0005215|transporter activity(ISS)	transporter activity	C	GO:0005743|mitochondrial inner membrane(ISS)	other cytoplasmic components	P	GO:0043069|negative regulation of programmed cell death(RCA)	other cellular processes	C
AT1G04480	C	GO:0009507|chloroplast(ISM)	chloroplast	P	GO:0006412|translation(ISS)	other metabolic processes	P	GO:0006412|translation(ISS)	other cellular processes	P	GO:0006412|translation(ISS)	protein metabolism	F	GO:0003735|structural constituent of ribosome(ISS)	structural molecule activity	C	GO:0005840|ribosome(ISS)	ribosome
AT2G33370	F	GO:0003735|structural constituent of ribosome(ISS)	structural molecule activity	C	GO:0009507|chloroplast(ISM)	chloroplast	P	GO:0006412|translation(ISS)	other cellular processes	C	GO:0022625|cytosolic large ribosomal subunit(IDA)	cytosol	C	GO:0005840|ribosome(ISS)	ribosome	C	GO:0005730|nucleolus(IDA)	nucleus	C	GO:0005730|nucleolus(IDA)	other intracellular components	C	GO:0022625|cytosolic large ribosomal subunit(IDA)	other cytoplasmic components	P	GO:0001510|RNA methylation(RCA)	other metabolic processes	P	GO:0001510|RNA methylation(RCA)	other cellular processes	C	GO:0022625|cytosolic large ribosomal subunit(IDA)	other intracellular components	P	GO:0006412|translation(ISS)	other metabolic processes	C	GO:0022625|cytosolic large ribosomal subunit(IDA)	ribosome	P	GO:0006412|translation(ISS)	protein metabolism
AT3G04400	C	GO:0005840|ribosome(ISS)	ribosome	P	GO:0006412|translation(ISS)	protein metabolism	P	GO:0006412|translation(ISS)	other metabolic processes	P	GO:0006412|translation(ISS)	other cellular processes	C	GO:0009507|chloroplast(ISM)	chloroplast	C	GO:0022625|cytosolic large ribosomal subunit(IDA)	other cytoplasmic components	P	GO:0009793|embryo development ending in seed dormancy(NAS)	developmental processes	C	GO:0022625|cytosolic large ribosomal subunit(IDA)	cytosol	C	GO:0022625|cytosolic large ribosomal subunit(IDA)	other intracellular components	C	GO:0022625|cytosolic large ribosomal subunit(IDA)	ribosome	C	GO:0009507|chloroplast(ISM)	chloroplast	F	GO:0003735|structural constituent of ribosome(ISS)	structural molecule activity
AT1G36310	F	GO:0008175|tRNA methyltransferase activity(IDA)	transferase activity	C	GO:0009507|chloroplast(ISM)	chloroplast	P	GO:0002098|tRNA wobble uridine modification(IMP)	other cellular processes	C	GO:0009507|chloroplast(ISM)	chloroplast	P	GO:0002098|tRNA wobble uridine modification(IMP)	other metabolic processes
AT5G13270	P	GO:0016556|mRNA modification(RCA)	other metabolic processes	C	GO:0009507|chloroplast(ISM)	chloroplast	P	GO:0009451|RNA modification(IMP)	other metabolic processes	P	GO:0009451|RNA modification(IMP)	other cellular processes	P	GO:0016556|mRNA modification(RCA)	other cellular processes
AT3G30805	C	GO:0005634|nucleus(ISM)	nucleus
AT4G14050	P	GO:0008150|biological_process(ND)	unknown biological processes	C	GO:0005739|mitochondrion(ISM)	mitochondria	C	GO:0016020|membrane(IDA)	other membranes
AT5G64816	C	GO:0005575|cellular_component(ND)	unknown cellular components	F	GO:0003674|molecular_function(ND)	unknown molecular functions	P	GO:0008150|biological_process(ND)	unknown biological processes
ATMG00630	P	GO:0010638|positive regulation of organelle organization(RCA)	cell organization and biogenesis	P	GO:0009887|organ morphogenesis(RCA)	developmental processes	C	GO:0005739|mitochondrion(ISM)	mitochondria	P	GO:0008150|biological_process(ND)	unknown biological processes	P	GO:0033044|regulation of chromosome organization(RCA)	cell organization and biogenesis	P	GO:0010638|positive regulation of organelle organization(RCA)	other cellular processes	P	GO:0009888|tissue development(RCA)	other biological processes	F	GO:0003674|molecular_function(ND)	unknown molecular functions	P	GO:0033044|regulation of chromosome organization(RCA)	other cellular processes
AT1G70350	C	GO:0005886|plasma membrane(ISM)	plasma membrane	F	GO:0003674|molecular_function(ND)	unknown molecular functions	P	GO:0008150|biological_process(ND)	unknown biological processes
AT3G45577	C	GO:0005634|nucleus(ISM)	nucleus
AT5G51880	No annotation
AT1G71260	C	GO:0005739|mitochondrion(IDA)	mitochondria	P	GO:0006281|DNA repair(IMP)	DNA or RNA metabolism	P	GO:0009086|methionine biosynthetic process(RCA)	other metabolic processes	P	GO:0006281|DNA repair(IMP)	other metabolic processes	C	GO:0009507|chloroplast(ISM)	chloroplast	F	GO:0003677|DNA binding(ISS)	DNA or RNA binding	P	GO:0006281|DNA repair(IMP)	response to stress	P	GO:0000394|RNA splicing, via endonucleolytic cleavage and ligation(RCA)	other cellular processes	P	GO:0000394|RNA splicing, via endonucleolytic cleavage and ligation(RCA)	other metabolic processes	P	GO:0006952|defense response(TAS)	response to stress	P	GO:0009086|methionine biosynthetic process(RCA)	other cellular processes	P	GO:0006281|DNA repair(IMP)	other cellular processes
AT5G08490	P	GO:0009737|response to abscisic acid(IMP)	other biological processes	P	GO:0009414|response to water deprivation(IMP)	response to stress	P	GO:0080156|mitochondrial mRNA modification(IMP)	other metabolic processes	P	GO:0080156|mitochondrial mRNA modification(IMP)	other cellular processes	C	GO:0005739|mitochondrion(ISM)	mitochondria	P	GO:0009414|response to water deprivation(IMP)	response to abiotic or biotic stimulus	C	GO:0005739|mitochondrion(IDA)	mitochondria	F	GO:0003674|molecular_function(ND)	unknown molecular functions
AT2G44050	C	GO:0009570|chloroplast stroma(IDA)	other cytoplasmic components	C	GO:0009507|chloroplast(IDA)	chloroplast	C	GO:0009570|chloroplast stroma(IDA)	other intracellular components	C	GO:0009570|chloroplast stroma(IDA)	plastid	P	GO:0006007|glucose catabolic process(RCA)	other metabolic processes	C	GO:0009507|chloroplast(IDA)	chloroplast	C	GO:0009570|chloroplast stroma(IDA)	plastid	F	GO:0000906|6,7-dimethyl-8-ribityllumazine synthase activity(ISS)	other enzyme activity	P	GO:0009231|riboflavin biosynthetic process(ISS)	other metabolic processes	F	GO:0000906|6,7-dimethyl-8-ribityllumazine synthase activity(IGI)	other enzyme activity	P	GO:0009231|riboflavin biosynthetic process(IGI)	other metabolic processes	C	GO:0009507|chloroplast(ISM)	chloroplast	C	GO:0009570|chloroplast stroma(IDA)	other cytoplasmic components	C	GO:0009570|chloroplast stroma(IDA)	other intracellular components	C	GO:0009570|chloroplast stroma(IDA)	chloroplast	P	GO:0009231|riboflavin biosynthetic process(IGI)	other cellular processes	C
AT3G59280	P	GO:0006626|protein targeting to mitochondrion(RCA)	cell organization and biogenesis	C	GO:0005739|mitochondrion(ISM)	mitochondria	P	GO:0006626|protein targeting to mitochondrion(RCA)	transport	C	GO:0005739|mitochondrion(IDA)	mitochondria	P	GO:0006626|protein targeting to mitochondrion(RCA)	other cellular processes
AT3G08740	C	GO:0009507|chloroplast(ISM)	chloroplast	P	GO:0045036|protein targeting to chloroplast(RCA)	transport	C	GO:0009570|chloroplast stroma(IDA)	chloroplast	C	GO:0009570|chloroplast stroma(IDA)	chloroplast	C	GO:0009570|chloroplast stroma(IDA)	plastid	P	GO:0016226|iron-sulfur cluster assembly(RCA)	cell organization and biogenesis	C	GO:0009570|chloroplast stroma(IDA)	other intracellular components	C	GO:0009570|chloroplast stroma(IDA)	other intracellular components	P	GO:0006414|translational elongation(ISS)	other metabolic processes	F	GO:0003746|translation elongation factor activity(ISS)	DNA or RNA binding	P	GO:0006414|translational elongation(ISS)	protein metabolism	P	GO:0006414|translational elongation(ISS)	other cellular processes	C	GO:0009507|chloroplast(IDA)	chloroplast	C	GO:0009570|chloroplast stroma(IDA)	plastid	C	GO:0009570|chloroplast stroma(IDA)	other cytoplasmic components	C	GO:0009570|chloroplast stroma(IDA)	other cytoplasmic components	C
AT1G10330	F	GO:0003674|molecular_function(ND)	unknown molecular functions	P	GO:0008150|biological_process(ND)	unknown biological processes	C	GO:0005739|mitochondrion(ISM)	mitochondria
AT3G56460	F	GO:0008270|zinc ion binding(ISS)	other binding	C	GO:0005777|peroxisome(IDA)	other cytoplasmic components	C	GO:0005777|peroxisome(IDA)	other intracellular components	C	GO:0005737|cytoplasm(ISM)	other cytoplasmic components
AT3G48050	P	GO:0035278|negative regulation of translation involved in gene silencing by miRNA(IDA)	protein metabolism	C	GO:0000932|cytoplasmic mRNA processing body(IDA)	other intracellular components	P	GO:0035278|negative regulation of translation involved in gene silencing by miRNA(IDA)	other cellular processes	F	GO:0003677|DNA binding(ISS)	DNA or RNA binding	C	GO:0000932|cytoplasmic mRNA processing body(IDA)	other cytoplasmic components	P	GO:0035278|negative regulation of translation involved in gene silencing by miRNA(IDA)	other metabolic processes	C	GO:0005634|nucleus(IDA)	nucleus
AT3G52700	F	GO:0003674|molecular_function(ND)	unknown molecular functions	P	GO:0008150|biological_process(ND)	unknown biological processes
AT4G40030	C	GO:0005634|nucleus(ISM)	nucleus	C	GO:0005634|nucleus(ISM)	nucleus	C	GO:0005634|nucleus(ISM)	nucleus	F	GO:0003677|DNA binding(ISS)	DNA or RNA binding
AT4G24080	P	GO:0009736|cytokinin-activated signaling pathway(IMP)	signal transduction	P	GO:0009736|cytokinin-activated signaling pathway(IMP)	other cellular processes	C	GO:0005575|cellular_component(ND)	unknown cellular components
AT1G79660	F	GO:0003674|molecular_function(ND)	unknown molecular functions	P	GO:0008150|biological_process(ND)	unknown biological processes	C	GO:0005739|mitochondrion(ISM)	mitochondria
AT4G21300	C	GO:0005739|mitochondrion(ISM)	mitochondria
AT5G60960	C	GO:0005739|mitochondrion(ISM)	mitochondria	P	GO:0009640|photomorphogenesis(RCA)	response to abiotic or biotic stimulus	P	GO:0009220|pyrimidine ribonucleotide biosynthetic process(RCA)	other metabolic processes	P	GO:0010388|cullin deneddylation(RCA)	protein metabolism	C	GO:0005739|mitochondrion(IDA)	mitochondria	C	GO:0005739|mitochondrion(IDA)	mitochondria	C	GO:0005844|polysome(IDA)	other intracellular components	P	GO:0009220|pyrimidine ribonucleotide biosynthetic process(RCA)	other cellular processes	P	GO:0009640|photomorphogenesis(RCA)	developmental processes	P	GO:0010388|cullin deneddylation(RCA)	other metabolic processes	C	GO:0005634|nucleus(IDA)	nucleus	F	GO:0003723|RNA binding(IDA)	DNA or RNA binding	P	GO:0010388|cullin deneddylation(RCA)	other cellular processes
AT4G23620	C	GO:0009507|chloroplast(ISM)	chloroplast	F	GO:0008270|zinc ion binding(IDA)	other binding	C	GO:0009507|chloroplast(ISM)	chloroplast	P	GO:0006783|heme biosynthetic process(RCA)	other cellular processes	P	GO:0006783|heme biosynthetic process(RCA)	other metabolic processes	F	GO:0050897|cobalt ion binding(IDA)	other binding
AT5G20080	P	GO:0006972|hyperosmotic response(RCA)	response to stress	P	GO:0006096|glycolytic process(RCA)	other metabolic processes	P	GO:0009651|response to salt stress(RCA)	response to stress	F	GO:0004128|cytochrome-b5 reductase activity, acting on NAD(P)H(ISS)	other enzyme activity	P	GO:0009651|response to salt stress(IEP)	response to abiotic or biotic stimulus	F	GO:0005507|copper ion binding(IDA)	other binding	C	GO:0005758|mitochondrial intermembrane space(TAS)	other cytoplasmic components	C	GO:0009505|plant-type cell wall(IDA)	cell wall	P	GO:0006972|hyperosmotic response(RCA)	response to abiotic or biotic stimulus	P	GO:0009266|response to temperature stimulus(RCA)	response to abiotic or biotic stimulus	P	GO:0006833|water transport(RCA)	transport	C	GO:0005739|mitochondrion(IDA)	mitochondria	P	GO:0009651|response to salt stress(RCA)	response to abiotic or biotic stimulus	P	GO:0009651|response to salt stress(IEP)	response to stress	P	GO:0046686|response to cadmium ion(RCA)	other biological processes	C	GO:0005758|mitochondrial intermembrane space(TAS)	other intracellular components	C
AT4G10620	C	GO:0005634|nucleus(ISM)	nucleus	F	GO:0005525|GTP binding(IBA)	nucleotide binding	F	GO:0005525|GTP binding(IBA)	other binding	P	GO:0008150|biological_process(ND)	unknown biological processes	P	GO:0042991|transcription factor import into nucleus(RCA)	transport
AT2G44520	F	GO:0004659|prenyltransferase activity(ISS)	transferase activity	C	GO:0005886|plasma membrane(ISM)	plasma membrane
AT3G52730	C	GO:0005750|mitochondrial respiratory chain complex III(IDA)	mitochondria	P	GO:0009853|photorespiration(RCA)	other metabolic processes	C	GO:0005739|mitochondrion(IDA)	mitochondria	C	GO:0016020|membrane(IDA)	other membranes	C	GO:0005750|mitochondrial respiratory chain complex III(IDA)	other membranes	P	GO:0006122|mitochondrial electron transport, ubiquinol to cytochrome c(ISS)	other metabolic processes	C	GO:0005739|mitochondrion(IDA)	mitochondria	P	GO:0006122|mitochondrial electron transport, ubiquinol to cytochrome c(ISS)	electron transport or energy pathways	C	GO:0005750|mitochondrial respiratory chain complex III(IDA)	other cytoplasmic components	C	GO:0005740|mitochondrial envelope(ISS)	mitochondria	P	GO:0009853|photorespiration(RCA)	other cellular processes	C	GO:0005739|mitochondrion(ISM)	mitochondria	F	GO:0008121|ubiquinol-cytochrome-c reductase activity(ISS)	transporter activity	F	GO:0008121|ubiquinol-cytochrome-c reductase activity(ISS)	other enzyme activity	C	GO:0005740|mitochondrial envelope(ISS)	other cytoplasmic components	P	GO:0006122|mitochondrial electron transport, ubiquinol to cytochrome c(ISS)	other cellular processes	C
AT1G70190	P	GO:0006354|DNA-templated transcription, elongation(RCA)	transcription,DNA-dependent	C	GO:0015934|large ribosomal subunit(ISS)	other cytoplasmic components	P	GO:0006354|DNA-templated transcription, elongation(RCA)	other cellular processes	F	GO:0003735|structural constituent of ribosome(ISS)	structural molecule activity	P	GO:0006412|translation(ISS)	other metabolic processes	C	GO:0005739|mitochondrion(ISM)	mitochondria	P	GO:0006412|translation(ISS)	protein metabolism	P	GO:0006354|DNA-templated transcription, elongation(RCA)	other metabolic processes	P	GO:0006412|translation(ISS)	other cellular processes	C	GO:0015934|large ribosomal subunit(ISS)	ribosome	C	GO:0015934|large ribosomal subunit(ISS)	other intracellular components	C	GO:0005739|mitochondrion(ISM)	mitochondria	C	GO:0005739|mitochondrion(IDA)	mitochondria
AT5G61400	C	GO:0005739|mitochondrion(ISM)	mitochondria	P	GO:0008150|biological_process(ND)	unknown biological processes	F	GO:0003674|molecular_function(ND)	unknown molecular functions
AT3G16890	C	GO:0005739|mitochondrion(IDA)	mitochondria	C	GO:0005739|mitochondrion(ISM)	mitochondria	P	GO:0006979|response to oxidative stress(IMP)	response to stress	P	GO:0042775|mitochondrial ATP synthesis coupled electron transport(IMP)	other cellular processes	P	GO:0042775|mitochondrial ATP synthesis coupled electron transport(IMP)	electron transport or energy pathways	P	GO:0009737|response to abscisic acid(IMP)	other biological processes	P	GO:0009651|response to salt stress(IMP)	response to stress	C	GO:0005739|mitochondrion(IDA)	mitochondria	P	GO:0042775|mitochondrial ATP synthesis coupled electron transport(IMP)	other metabolic processes	P	GO:0009651|response to salt stress(IMP)	response to abiotic or biotic stimulus
AT5G40650	C	GO:0005749|mitochondrial respiratory chain complex II, succinate dehydrogenase complex (ubiquinone)(IDA)	other cytoplasmic components	P	GO:0006121|mitochondrial electron transport, succinate to ubiquinone(ISS)	electron transport or energy pathways	C	GO:0005739|mitochondrion(IDA)	mitochondria	P	GO:0006121|mitochondrial electron transport, succinate to ubiquinone(ISS)	other cellular processes	C	GO:0045281|succinate dehydrogenase complex(ISS)	other intracellular components	F	GO:0008270|zinc ion binding(IDA)	other binding	C	GO:0005739|mitochondrion(ISM)	mitochondria	P	GO:0006121|mitochondrial electron transport, succinate to ubiquinone(ISS)	other metabolic processes	C	GO:0005749|mitochondrial respiratory chain complex II, succinate dehydrogenase complex (ubiquinone)(IDA)	other membranes	C	GO:0005749|mitochondrial respiratory chain complex II, succinate dehydrogenase complex (ubiquinone)(IDA)	other intracellular components	F	GO:0009055|electron carrier activity(ISS)	other molecular functions	C	GO:0005749|mitochondrial respiratory chain complex II, succinate dehydrogenase complex (ubiquinone)(IDA)	mitochondria	F	GO:0000104|succinate dehydrogenase activity(ISS)	other enzyme activity	C	GO:0045281|succinate dehydrogenase complex(ISS)	other membranes	C	GO:0005739|mitochondrion(IDA)	mitochondria	C	GO:0005739|mitochondrion(IDA)	mitochondria
AT1G04340	F	GO:0003674|molecular_function(ND)	unknown molecular functions	P	GO:0008150|biological_process(ND)	unknown biological processes	C	GO:0009507|chloroplast(ISM)	chloroplast
AT1G61990	C	GO:0005739|mitochondrion(IDA)	mitochondria
AT2G33680	C	GO:0005575|cellular_component(ND)	unknown cellular components	P	GO:0008150|biological_process(ND)	unknown biological processes
AT3G05340	F	GO:0003674|molecular_function(ND)	unknown molecular functions	C	GO:0005739|mitochondrion(ISM)	mitochondria	P	GO:0008150|biological_process(ND)	unknown biological processes
AT5G27470	P	GO:0006434|seryl-tRNA aminoacylation(ISS)	other cellular processes	P	GO:0006096|glycolytic process(RCA)	other metabolic processes	P	GO:0009651|response to salt stress(RCA)	response to stress	P	GO:0009165|nucleotide biosynthetic process(RCA)	other metabolic processes	P	GO:0046686|response to cadmium ion(RCA)	other biological processes	P	GO:0046686|response to cadmium ion(IEP)	other biological processes	C	GO:0005829|cytosol(IDA)	cytosol	P	GO:0006094|gluconeogenesis(RCA)	other metabolic processes	P	GO:0006499|N-terminal protein myristoylation(RCA)	other metabolic processes	P	GO:0009165|nucleotide biosynthetic process(RCA)	other cellular processes	P	GO:0006434|seryl-tRNA aminoacylation(ISS)	protein metabolism	C	GO:0005829|cytosol(ISS)	cytosol	P	GO:0006096|glycolytic process(RCA)	other cellular processes	P	GO:0006499|N-terminal protein myristoylation(RCA)	other cellular processes	P	GO:0006096|glycolytic process(RCA)	electron transport or energy pathways	C	GO:0005737|cytoplasm(ISM)	other cytoplasmic components	F
AT1G18600	C	GO:0005739|mitochondrion(IDA)	mitochondria
AT1G07170	P	GO:0000398|mRNA splicing, via spliceosome(ISS)	other metabolic processes	C	GO:0005634|nucleus(ISM)	nucleus	P	GO:0000398|mRNA splicing, via spliceosome(ISS)	other cellular processes	C	GO:0005689|U12-type spliceosomal complex(ISS)	nucleus	F	GO:0003674|molecular_function(ND)	unknown molecular functions	C	GO:0005634|nucleus(ISM)	nucleus	C	GO:0005689|U12-type spliceosomal complex(ISS)	other intracellular components	C	GO:0005634|nucleus(ISM)	nucleus
AT2G30000	C	GO:0005634|nucleus(ISM)	nucleus
AT4G38150	F	GO:0003674|molecular_function(ND)	unknown molecular functions	C	GO:0005739|mitochondrion(ISM)	mitochondria	P	GO:0008150|biological_process(ND)	unknown biological processes	C	GO:0005739|mitochondrion(ISM)	mitochondria
AT1G19140	C	GO:0005739|mitochondrion(ISM)	mitochondria	F	GO:0003674|molecular_function(ND)	unknown molecular functions	C	GO:0005739|mitochondrion(IDA)	mitochondria	C	GO:0005739|mitochondrion(ISM)	mitochondria
AT5G62575	C	GO:0005739|mitochondrion(IDA)	mitochondria	C	GO:0005749|mitochondrial respiratory chain complex II, succinate dehydrogenase complex (ubiquinone)(IDA)	other membranes	C	GO:0005739|mitochondrion(IDA)	mitochondria	C	GO:0005749|mitochondrial respiratory chain complex II, succinate dehydrogenase complex (ubiquinone)(IDA)	other intracellular components	C	GO:0009507|chloroplast(ISM)	chloroplast	F	GO:0003674|molecular_function(ND)	unknown molecular functions	P	GO:0006661|phosphatidylinositol biosynthetic process(RCA)	other cellular processes	P	GO:0006661|phosphatidylinositol biosynthetic process(RCA)	other metabolic processes	C	GO:0005749|mitochondrial respiratory chain complex II, succinate dehydrogenase complex (ubiquinone)(IDA)	mitochondria	C	GO:0005749|mitochondrial respiratory chain complex II, succinate dehydrogenase complex (ubiquinone)(IDA)	other cytoplasmic components	C	GO:0009507|chloroplast(ISM)	chloroplast
AT2G26980	F	GO:0004672|protein kinase activity(TAS)	transferase activity	C	GO:0005886|plasma membrane(ISM)	plasma membrane	F	GO:0016301|kinase activity(ISS)	kinase activity	P	GO:0009738|abscisic acid-activated signaling pathway(TAS)	other cellular processes	F	GO:0004674|protein serine/threonine kinase activity(ISS)	kinase activity	F	GO:0004674|protein serine/threonine kinase activity(ISS)	transferase activity	P	GO:0009735|response to cytokinin(IEP)	other biological processes	C	GO:0005634|nucleus(IDA)	nucleus	C	GO:0005886|plasma membrane(ISM)	plasma membrane	C	GO:0005886|plasma membrane(ISM)	plasma membrane	P	GO:0009845|seed germination(IEP)	developmental processes	C	GO:0005737|cytoplasm(IDA)	other cytoplasmic components	P	GO:0009738|abscisic acid-activated signaling pathway(TAS)	signal transduction	P	GO:0009737|response to abscisic acid(IEP)	other biological processes	C	GO:0005886|plasma membrane(ISM)	plasma membrane	F	GO:0004672|protein kinase activity(TAS)	kinase activity	C
AT1G17630	C	GO:0005739|mitochondrion(ISM)	mitochondria	P	GO:0008150|biological_process(ND)	unknown biological processes
AT4G20090	P	GO:0009793|embryo development ending in seed dormancy(NAS)	developmental processes	C	GO:0005739|mitochondrion(ISM)	mitochondria	P	GO:0009793|embryo development ending in seed dormancy(IMP)	developmental processes
AT5G49410	F	GO:0003674|molecular_function(ND)	unknown molecular functions	C	GO:0005739|mitochondrion(ISM)	mitochondria	P	GO:0008150|biological_process(ND)	unknown biological processes	C	GO:0005739|mitochondrion(ISM)	mitochondria
AT5G17460	F	GO:0003674|molecular_function(ND)	unknown molecular functions
AT5G47570	C	GO:0005747|mitochondrial respiratory chain complex I(IDA)	other membranes	C	GO:0005747|mitochondrial respiratory chain complex I(IDA)	mitochondria	P	GO:0009853|photorespiration(RCA)	other cellular processes	P	GO:0051788|response to misfolded protein(RCA)	response to stress	C	GO:0005747|mitochondrial respiratory chain complex I(IDA)	other intracellular components	F	GO:0003674|molecular_function(ND)	unknown molecular functions	C	GO:0005747|mitochondrial respiratory chain complex I(IDA)	other cytoplasmic components	C	GO:0005747|mitochondrial respiratory chain complex I(IDA)	other cytoplasmic components	P	GO:0006511|ubiquitin-dependent protein catabolic process(RCA)	other cellular processes	P	GO:0006511|ubiquitin-dependent protein catabolic process(RCA)	protein metabolism	P	GO:0080129|proteasome core complex assembly(RCA)	cell organization and biogenesis	P	GO:0006511|ubiquitin-dependent protein catabolic process(RCA)	other metabolic processes	C	GO:0005747|mitochondrial respiratory chain complex I(IDA)	other membranes	C	GO:0005747|mitochondrial respiratory chain complex I(IDA)	other intracellular components	C	GO:0005747|mitochondrial respiratory chain complex I(IDA)	mitochondria	P	GO:0009853|photorespiration(RCA)	other metabolic processes
AT5G28460	P	GO:0008150|biological_process(ND)	unknown biological processes	C	GO:0005739|mitochondrion(ISM)	mitochondria
AT2G41720	C	GO:0005739|mitochondrion(ISM)	mitochondria	C	GO:0009507|chloroplast(ISM)	chloroplast	P	GO:0009793|embryo development ending in seed dormancy(NAS)	developmental processes
AT5G35400	P	GO:0006730|one-carbon metabolic process(RCA)	other cellular processes	C	GO:0005634|nucleus(ISM)	nucleus	P	GO:0006730|one-carbon metabolic process(RCA)	other metabolic processes	F	GO:0009982|pseudouridine synthase activity(TAS)	other enzyme activity	F	GO:0009982|pseudouridine synthase activity(ISS)	other enzyme activity
AT5G56500	C	GO:0009570|chloroplast stroma(IDA)	other cytoplasmic components	C	GO:0009570|chloroplast stroma(IDA)	chloroplast	C	GO:0009507|chloroplast(IDA)	chloroplast	C	GO:0009570|chloroplast stroma(IDA)	other intracellular components	C	GO:0009507|chloroplast(ISM)	chloroplast	C	GO:0009570|chloroplast stroma(IDA)	plastid	C	GO:0009507|chloroplast(ISM)	chloroplast	C	GO:0005829|cytosol(IDA)	cytosol	C	GO:0009507|chloroplast(IDA)	chloroplast	C	GO:0016020|membrane(IDA)	other membranes	C	GO:0009570|chloroplast stroma(IDA)	chloroplast	C	GO:0009507|chloroplast(IDA)	chloroplast	C	GO:0009570|chloroplast stroma(IDA)	other intracellular components	C	GO:0009570|chloroplast stroma(IDA)	other cytoplasmic components	C	GO:0016020|membrane(IDA)	other membranes	C	GO:0009570|chloroplast stroma(IDA)	plastid	C
AT1G47420	C	GO:0005749|mitochondrial respiratory chain complex II, succinate dehydrogenase complex (ubiquinone)(IDA)	mitochondria	C	GO:0005749|mitochondrial respiratory chain complex II, succinate dehydrogenase complex (ubiquinone)(IDA)	other cytoplasmic components	C	GO:0005749|mitochondrial respiratory chain complex II, succinate dehydrogenase complex (ubiquinone)(IDA)	other membranes	P	GO:0009853|photorespiration(RCA)	other cellular processes	P	GO:0051788|response to misfolded protein(RCA)	response to stress	C	GO:0005739|mitochondrion(IDA)	mitochondria	C	GO:0005634|nucleus(IDA)	nucleus	C	GO:0005739|mitochondrion(IDA)	mitochondria	C	GO:0005739|mitochondrion(IDA)	mitochondria	C	GO:0005739|mitochondrion(IDA)	mitochondria	P	GO:0006511|ubiquitin-dependent protein catabolic process(RCA)	other metabolic processes	P	GO:0009853|photorespiration(RCA)	other metabolic processes	P	GO:0006511|ubiquitin-dependent protein catabolic process(RCA)	other cellular processes	P	GO:0009735|response to cytokinin(IDA)	other biological processes	P	GO:0080129|proteasome core complex assembly(RCA)	cell organization and biogenesis	F	GO:0003674|molecular_function(ND)	unknown molecular functions	C
AT5G23300	P	GO:0006355|regulation of transcription, DNA-templated(RCA)	other metabolic processes	P	GO:0006164|purine nucleotide biosynthetic process(RCA)	other cellular processes	P	GO:0009220|pyrimidine ribonucleotide biosynthetic process(RCA)	other cellular processes	P	GO:0043687|post-translational protein modification(RCA)	other cellular processes	P	GO:0009220|pyrimidine ribonucleotide biosynthetic process(IDA)	other metabolic processes	P	GO:0045893|positive regulation of transcription, DNA-templated(RCA)	other cellular processes	P	GO:0043687|post-translational protein modification(RCA)	other metabolic processes	F	GO:0004152|dihydroorotate dehydrogenase activity(ISS)	other enzyme activity	P	GO:0006164|purine nucleotide biosynthetic process(RCA)	other metabolic processes	P	GO:0045893|positive regulation of transcription, DNA-templated(RCA)	other metabolic processes	P	GO:0006207|'de novo' pyrimidine nucleobase biosynthetic process(ISS)	other metabolic processes	P	GO:0006207|'de novo' pyrimidine nucleobase biosynthetic process(ISS)	other cellular processes	P	GO:0042991|transcription factor import into nucleus(RCA)	transport	C	GO:0005739|mitochondrion(IDA)	mitochondria	P	GO:0006355|regulation of transcription, DNA-templated(RCA)	transcription,DNA-dependent	P	GO:0009220|pyrimidine ribonucleotide biosynthetic process(IGI)	other cellular processes	P
AT5G64400	C	GO:0005739|mitochondrion(ISM)	mitochondria	P	GO:0008150|biological_process(ND)	unknown biological processes	F	GO:0003674|molecular_function(ND)	unknown molecular functions
AT4G34265	P	GO:0008150|biological_process(ND)	unknown biological processes	C	GO:0005739|mitochondrion(ISM)	mitochondria	C	GO:0005739|mitochondrion(ISM)	mitochondria	F	GO:0003674|molecular_function(ND)	unknown molecular functions
AT2G06555	C	GO:0009507|chloroplast(ISM)	chloroplast	P	GO:0008150|biological_process(ND)	unknown biological processes	C	GO:0009507|chloroplast(ISM)	chloroplast	F	GO:0003674|molecular_function(ND)	unknown molecular functions
AT3G24570	C	GO:0005778|peroxisomal membrane(ISS)	other membranes	F	GO:0003674|molecular_function(ND)	unknown molecular functions	C	GO:0005739|mitochondrion(ISM)	mitochondria	C	GO:0005739|mitochondrion(ISM)	mitochondria	C	GO:0005778|peroxisomal membrane(ISS)	other cytoplasmic components	P	GO:0008150|biological_process(ND)	unknown biological processes	C	GO:0005778|peroxisomal membrane(ISS)	other intracellular components
AT5G06190	C	GO:0005739|mitochondrion(ISM)	mitochondria	C	GO:0005739|mitochondrion(ISM)	mitochondria	F	GO:0003674|molecular_function(ND)	unknown molecular functions	P	GO:0008150|biological_process(ND)	unknown biological processes
AT2G34400	P	GO:0008150|biological_process(ND)	unknown biological processes	C	GO:0005739|mitochondrion(ISM)	mitochondria
AT2G20835	F	GO:0003674|molecular_function(ND)	unknown molecular functions	C	GO:0005576|extracellular region(ISM)	extracellular	P	GO:0008150|biological_process(ND)	unknown biological processes
AT1G78890	F	GO:0003674|molecular_function(ND)	unknown molecular functions	P	GO:0008150|biological_process(ND)	unknown biological processes	C	GO:0009507|chloroplast(ISM)	chloroplast
AT3G04840	P	GO:0006412|translation(ISS)	other cellular processes	C	GO:0022626|cytosolic ribosome(IDA)	cytosol	C	GO:0022626|cytosolic ribosome(IDA)	other intracellular components	C	GO:0022626|cytosolic ribosome(IDA)	cytosol	C	GO:0022626|cytosolic ribosome(IDA)	other intracellular components	P	GO:0001510|RNA methylation(RCA)	other metabolic processes	C	GO:0022627|cytosolic small ribosomal subunit(IDA)	ribosome	C	GO:0022627|cytosolic small ribosomal subunit(ISS)	cytosol	C	GO:0022627|cytosolic small ribosomal subunit(IDA)	other cytoplasmic components	P	GO:0009220|pyrimidine ribonucleotide biosynthetic process(RCA)	other cellular processes	C	GO:0022626|cytosolic ribosome(IDA)	other intracellular components	C	GO:0022626|cytosolic ribosome(IDA)	ribosome	C	GO:0022627|cytosolic small ribosomal subunit(ISS)	other intracellular components	C	GO:0005886|plasma membrane(IDA)	plasma membrane	P	GO:0006412|translation(ISS)	protein metabolism	C	GO:0005737|cytoplasm(ISM)	other cytoplasmic components	F
AT3G57740	C	GO:0005634|nucleus(ISM)	nucleus	F	GO:0016301|kinase activity(ISS)	kinase activity
AT4G10613	C	GO:0005739|mitochondrion(ISM)	mitochondria
AT3G25520	P	GO:0009220|pyrimidine ribonucleotide biosynthetic process(RCA)	other metabolic processes	C	GO:0005737|cytoplasm(ISM)	other cytoplasmic components	C	GO:0022626|cytosolic ribosome(IDA)	other intracellular components	C	GO:0022626|cytosolic ribosome(IDA)	other intracellular components	C	GO:0005730|nucleolus(IDA)	nucleus	C	GO:0022626|cytosolic ribosome(IDA)	other cytoplasmic components	C	GO:0005634|nucleus(IDA)	nucleus	C	GO:0022626|cytosolic ribosome(IDA)	ribosome	C	GO:0022626|cytosolic ribosome(IDA)	other cytoplasmic components	C	GO:0022626|cytosolic ribosome(IDA)	ribosome	P	GO:0009220|pyrimidine ribonucleotide biosynthetic process(RCA)	other cellular processes	P	GO:0006412|translation(ISS)	protein metabolism	P	GO:0042254|ribosome biogenesis(ISS)	other biological processes	C	GO:0022625|cytosolic large ribosomal subunit(IDA)	other intracellular components	P	GO:0001510|RNA methylation(RCA)	other metabolic processes	C	GO:0005730|nucleolus(IDA)	other intracellular components	C
AT4G14170	P	GO:0008150|biological_process(ND)	unknown biological processes	F	GO:0003674|molecular_function(ND)	unknown molecular functions	C	GO:0005739|mitochondrion(ISM)	mitochondria
AT1G35900	P	GO:0008150|biological_process(ND)	unknown biological processes	C	GO:0005739|mitochondrion(ISM)	mitochondria	F	GO:0003674|molecular_function(ND)	unknown molecular functions
AT1G16870	C	GO:0005739|mitochondrion(ISM)	mitochondria	P	GO:0009220|pyrimidine ribonucleotide biosynthetic process(RCA)	other cellular processes	P	GO:0006164|purine nucleotide biosynthetic process(RCA)	other cellular processes	P	GO:0008150|biological_process(ND)	unknown biological processes	F	GO:0003674|molecular_function(ND)	unknown molecular functions	P	GO:0006164|purine nucleotide biosynthetic process(RCA)	other metabolic processes	P	GO:0009220|pyrimidine ribonucleotide biosynthetic process(RCA)	other metabolic processes
AT5G37570	C	GO:0005739|mitochondrion(ISM)	mitochondria	P	GO:0008150|biological_process(ND)	unknown biological processes	F	GO:0003674|molecular_function(ND)	unknown molecular functions
AT1G56570	F	GO:0003674|molecular_function(ND)	unknown molecular functions	P	GO:0009651|response to salt stress(IMP)	response to stress	P	GO:0050832|defense response to fungus(IMP)	response to abiotic or biotic stimulus	P	GO:0009737|response to abscisic acid(IMP)	other biological processes	C	GO:0005739|mitochondrion(IDA)	mitochondria	P	GO:0009749|response to glucose(IMP)	other biological processes	P	GO:0009651|response to salt stress(IMP)	response to abiotic or biotic stimulus	P	GO:0050832|defense response to fungus(IMP)	response to stress	C	GO:0005739|mitochondrion(ISM)	mitochondria
AT3G11760	P	GO:0008150|biological_process(ND)	unknown biological processes	C	GO:0005634|nucleus(ISM)	nucleus	F	GO:0003674|molecular_function(ND)	unknown molecular functions
AT1G78915	C	GO:0009535|chloroplast thylakoid membrane(IDA)	plastid	C	GO:0009535|chloroplast thylakoid membrane(IDA)	other intracellular components	C	GO:0009535|chloroplast thylakoid membrane(IDA)	other intracellular components	C	GO:0009507|chloroplast(IDA)	chloroplast	C	GO:0009535|chloroplast thylakoid membrane(IDA)	other cytoplasmic components	C	GO:0009535|chloroplast thylakoid membrane(IDA)	other membranes	C	GO:0009535|chloroplast thylakoid membrane(IDA)	chloroplast	C	GO:0009535|chloroplast thylakoid membrane(IDA)	chloroplast	C	GO:0009535|chloroplast thylakoid membrane(IDA)	plastid	P	GO:0008150|biological_process(ND)	unknown biological processes	C	GO:0009535|chloroplast thylakoid membrane(IDA)	other membranes	C	GO:0009535|chloroplast thylakoid membrane(IDA)	other cytoplasmic components
AT2G21090	C	GO:0005575|cellular_component(ND)	unknown cellular components	F	GO:0003674|molecular_function(ND)	unknown molecular functions	P	GO:0008150|biological_process(ND)	unknown biological processes
AT4G36400	F	GO:0009055|electron carrier activity(ISS)	other molecular functions	C	GO:0005739|mitochondrion(ISM)	mitochondria	C	GO:0005739|mitochondrion(ISM)	mitochondria	C	GO:0005739|mitochondrion(IDA)	mitochondria	F	GO:0051990|(R)-2-hydroxyglutarate dehydrogenase activity(IDA)	other enzyme activity	C	GO:0005739|mitochondrion(IDA)	mitochondria
AT5G48840	P	GO:0015940|pantothenate biosynthetic process(IMP)	other metabolic processes	C	GO:0005829|cytosol(IDA)	cytosol	F	GO:0042803|protein homodimerization activity(IDA)	protein binding	F	GO:0004592|pantoate-beta-alanine ligase activity(ISS)	other enzyme activity	P	GO:0015940|pantothenate biosynthetic process(ISS)	other metabolic processes	P	GO:0015940|pantothenate biosynthetic process(IMP)	other cellular processes	F	GO:0004592|pantoate-beta-alanine ligase activity(IGI)	other enzyme activity	P	GO:0015940|pantothenate biosynthetic process(ISS)	other cellular processes	C	GO:0005737|cytoplasm(ISM)	other cytoplasmic components	P	GO:0009793|embryo development ending in seed dormancy(IMP)	developmental processes	F	GO:0004592|pantoate-beta-alanine ligase activity(IDA)	other enzyme activity
AT4G37660	C	GO:0015934|large ribosomal subunit(ISS)	other intracellular components	P	GO:0006354|DNA-templated transcription, elongation(RCA)	other cellular processes	C	GO:0005739|mitochondrion(ISM)	mitochondria	P	GO:0006412|translation(ISS)	other cellular processes	C	GO:0015934|large ribosomal subunit(ISS)	other cytoplasmic components	C	GO:0015934|large ribosomal subunit(ISS)	ribosome	P	GO:0006354|DNA-templated transcription, elongation(RCA)	transcription,DNA-dependent	P	GO:0006412|translation(ISS)	protein metabolism	P	GO:0006412|translation(ISS)	other metabolic processes	F	GO:0003735|structural constituent of ribosome(ISS)	structural molecule activity	P	GO:0006354|DNA-templated transcription, elongation(RCA)	other metabolic processes
AT1G11630	C	GO:0005739|mitochondrion(IDA)	mitochondria	C	GO:0005739|mitochondrion(ISM)	mitochondria	P	GO:0008150|biological_process(ND)	unknown biological processes
AT5G03230	C	GO:0005634|nucleus(ISM)	nucleus	F	GO:0003674|molecular_function(ND)	unknown molecular functions	P	GO:0008150|biological_process(ND)	unknown biological processes
AT1G44414	P	GO:0006457|protein folding(RCA)	other cellular processes	F	GO:0003674|molecular_function(ND)	unknown molecular functions	P	GO:0006457|protein folding(RCA)	other metabolic processes	P	GO:0009644|response to high light intensity(RCA)	response to abiotic or biotic stimulus	P	GO:0008150|biological_process(ND)	unknown biological processes	C	GO:0005739|mitochondrion(ISM)	mitochondria	P	GO:0009408|response to heat(RCA)	response to stress	P	GO:0042542|response to hydrogen peroxide(RCA)	response to stress	P	GO:0006457|protein folding(RCA)	protein metabolism	P	GO:0009408|response to heat(RCA)	response to abiotic or biotic stimulus
AT2G48121	C	GO:0005739|mitochondrion(ISM)	mitochondria	C	GO:0005737|cytoplasm(ISM)	other cytoplasmic components
AT2G07721	P	GO:0008150|biological_process(ND)	unknown biological processes	F	GO:0003674|molecular_function(ND)	unknown molecular functions	C	GO:0005739|mitochondrion(ISM)	mitochondria
AT5G51960	P	GO:0008150|biological_process(ND)	unknown biological processes	C	GO:0005575|cellular_component(ND)	unknown cellular components	F	GO:0003674|molecular_function(ND)	unknown molecular functions
AT5G66658	P	GO:0008150|biological_process(ND)	unknown biological processes	F	GO:0003674|molecular_function(ND)	unknown molecular functions	C	GO:0005739|mitochondrion(ISM)	mitochondria
AT5G63620	C	GO:0005739|mitochondrion(ISM)	mitochondria	C	GO:0005739|mitochondrion(ISM)	mitochondria	F	GO:0008270|zinc ion binding(ISS)	other binding	F	GO:0008270|zinc ion binding(IDA)	other binding	F	GO:0050897|cobalt ion binding(IDA)	other binding
AT1G65020	C	GO:0005783|endoplasmic reticulum(IDA)	ER	P	GO:0008150|biological_process(ND)	unknown biological processes	F	GO:0003674|molecular_function(ND)	unknown molecular functions	C	GO:0005886|plasma membrane(IDA)	plasma membrane	C	GO:0005783|endoplasmic reticulum(IDA)	ER
AT5G49210	C	GO:0009507|chloroplast(ISM)	chloroplast	P	GO:0008150|biological_process(ND)	unknown biological processes	C	GO:0009507|chloroplast(ISM)	chloroplast	F	GO:0003674|molecular_function(ND)	unknown molecular functions
AT5G15750	F	GO:0003723|RNA binding(ISS)	DNA or RNA binding	C	GO:0022627|cytosolic small ribosomal subunit(IDA)	other intracellular components	P	GO:0006626|protein targeting to mitochondrion(RCA)	cell organization and biogenesis	C	GO:0022627|cytosolic small ribosomal subunit(IDA)	cytosol	P	GO:0006626|protein targeting to mitochondrion(RCA)	other cellular processes	C	GO:0022627|cytosolic small ribosomal subunit(IDA)	ribosome	C	GO:0005634|nucleus(ISM)	nucleus	C	GO:0022627|cytosolic small ribosomal subunit(IDA)	other cytoplasmic components	P	GO:0006626|protein targeting to mitochondrion(RCA)	transport
AT3G55605	P	GO:0034968|histone lysine methylation(RCA)	cell organization and biogenesis	P	GO:0009560|embryo sac egg cell differentiation(RCA)	developmental processes	P	GO:0009640|photomorphogenesis(RCA)	developmental processes	P	GO:0006626|protein targeting to mitochondrion(RCA)	other cellular processes	P	GO:0009909|regulation of flower development(RCA)	developmental processes	P	GO:0009560|embryo sac egg cell differentiation(RCA)	other cellular processes	P	GO:0008150|biological_process(ND)	unknown biological processes	C	GO:0005759|mitochondrial matrix(ISS)	mitochondria	P	GO:0034968|histone lysine methylation(RCA)	protein metabolism	P	GO:0010388|cullin deneddylation(RCA)	other cellular processes	P	GO:0034968|histone lysine methylation(RCA)	other cellular processes	P	GO:0006626|protein targeting to mitochondrion(RCA)	cell organization and biogenesis	C	GO:0005759|mitochondrial matrix(ISS)	other cytoplasmic components	P	GO:0034968|histone lysine methylation(RCA)	other metabolic processes	P	GO:0010388|cullin deneddylation(RCA)	protein metabolism	C	GO:0005759|mitochondrial matrix(ISS)	other intracellular components	P
AT5G50330	P	GO:0010413|glucuronoxylan metabolic process(RCA)	other cellular processes	C	GO:0009536|plastid(IDA)	plastid	P	GO:0010413|glucuronoxylan metabolic process(RCA)	other metabolic processes	P	GO:0045492|xylan biosynthetic process(RCA)	other metabolic processes	C	GO:0005886|plasma membrane(ISM)	plasma membrane	P	GO:0045492|xylan biosynthetic process(RCA)	other cellular processes	C	GO:0005886|plasma membrane(ISM)	plasma membrane
AT1G14620	P	GO:0034968|histone lysine methylation(RCA)	cell organization and biogenesis	C	GO:0005739|mitochondrion(ISM)	mitochondria	P	GO:0009909|regulation of flower development(RCA)	developmental processes	P	GO:0034968|histone lysine methylation(RCA)	other metabolic processes	P	GO:0008150|biological_process(ND)	unknown biological processes	P	GO:0034968|histone lysine methylation(RCA)	protein metabolism	C	GO:0005739|mitochondrion(IDA)	mitochondria	C	GO:0005739|mitochondrion(ISM)	mitochondria	P	GO:0034968|histone lysine methylation(RCA)	other cellular processes
AT1G15370	C	GO:0009507|chloroplast(ISM)	chloroplast
AT2G07734	F	GO:0003723|RNA binding(ISS)	DNA or RNA binding	C	GO:0015935|small ribosomal subunit(ISS)	other cytoplasmic components	C	GO:0005739|mitochondrion(ISM)	mitochondria	P	GO:0006412|translation(ISS)	other metabolic processes	F	GO:0003735|structural constituent of ribosome(ISS)	structural molecule activity	P	GO:0006412|translation(ISS)	other cellular processes	C	GO:0015935|small ribosomal subunit(ISS)	ribosome	C	GO:0015935|small ribosomal subunit(ISS)	other intracellular components	P	GO:0006412|translation(ISS)	protein metabolism
ATMG00290	C	GO:0005763|mitochondrial small ribosomal subunit(TAS)	other cytoplasmic components	C	GO:0005763|mitochondrial small ribosomal subunit(TAS)	mitochondria	P	GO:0006412|translation(TAS)	other cellular processes	P	GO:0006412|translation(TAS)	other metabolic processes	P	GO:0006412|translation(TAS)	protein metabolism	C	GO:0005739|mitochondrion(IDA)	mitochondria	C	GO:0005763|mitochondrial small ribosomal subunit(TAS)	ribosome	F	GO:0003735|structural constituent of ribosome(NAS)	structural molecule activity	C	GO:0005763|mitochondrial small ribosomal subunit(TAS)	other intracellular components	C	GO:0005739|mitochondrion(ISM)	mitochondria	F	GO:0005515|protein binding(IPI)	protein binding
AT4G26800	P	GO:0008150|biological_process(ND)	unknown biological processes	C	GO:0005739|mitochondrion(ISM)	mitochondria
AT2G18200	P	GO:0008150|biological_process(ND)	unknown biological processes	C	GO:0005739|mitochondrion(ISM)	mitochondria	F	GO:0003674|molecular_function(ND)	unknown molecular functions
AT4G26910	C	GO:0005739|mitochondrion(IDA)	mitochondria	C	GO:0005739|mitochondrion(ISM)	mitochondria	C	GO:0005739|mitochondrion(IDA)	mitochondria	C	GO:0005739|mitochondrion(IDA)	mitochondria	P	GO:0034976|response to endoplasmic reticulum stress(RCA)	response to stress	F	GO:0016746|transferase activity, transferring acyl groups(ISS)	transferase activity	P	GO:0009627|systemic acquired resistance(RCA)	response to abiotic or biotic stimulus	C	GO:0005739|mitochondrion(ISM)	mitochondria	C	GO:0016020|membrane(IDA)	other membranes	P	GO:0008152|metabolic process(ISS)	other metabolic processes	F	GO:0008270|zinc ion binding(IDA)	other binding	C	GO:0005739|mitochondrion(IDA)	mitochondria	C	GO:0005739|mitochondrion(IDA)	mitochondria	C	GO:0005739|mitochondrion(IDA)	mitochondria	P	GO:0009627|systemic acquired resistance(RCA)	response to stress	C	GO:0016020|membrane(IDA)	other membranes	C
AT3G48250	C	GO:0005739|mitochondrion(ISM)	mitochondria	P	GO:0008380|RNA splicing(IMP)	other cellular processes	P	GO:0009560|embryo sac egg cell differentiation(RCA)	other cellular processes	C	GO:0005739|mitochondrion(IDA)	mitochondria	P	GO:0009560|embryo sac egg cell differentiation(RCA)	developmental processes	P	GO:0008380|RNA splicing(IMP)	other metabolic processes
AT5G40410	P	GO:0008150|biological_process(ND)	unknown biological processes	C	GO:0005739|mitochondrion(ISM)	mitochondria
AT2G38420	P	GO:0008150|biological_process(ND)	unknown biological processes	C	GO:0005739|mitochondrion(ISM)	mitochondria
AT1G64220	No annotation
AT2G31140	C	GO:0005774|vacuolar membrane(IDA)	other cytoplasmic components	C	GO:0005774|vacuolar membrane(IDA)	other intracellular components	C	GO:0005739|mitochondrion(ISM)	mitochondria	C	GO:0005774|vacuolar membrane(IDA)	other membranes
AT3G13420	F	GO:0003674|molecular_function(ND)	unknown molecular functions	P	GO:0008150|biological_process(ND)	unknown biological processes	C	GO:0005739|mitochondrion(ISM)	mitochondria
AT5G54150	C	GO:0005634|nucleus(ISM)	nucleus	P	GO:0008150|biological_process(ND)	unknown biological processes	F	GO:0003674|molecular_function(ND)	unknown molecular functions
AT5G28920	C	GO:0005739|mitochondrion(ISM)	mitochondria	F	GO:0003674|molecular_function(ND)	unknown molecular functions	P	GO:0008150|biological_process(ND)	unknown biological processes
AT1G32415	F	GO:0003674|molecular_function(ND)	unknown molecular functions	P	GO:0008150|biological_process(ND)	unknown biological processes	C	GO:0005739|mitochondrion(ISM)	mitochondria
AT2G44970	No annotation
AT1G03150	P	GO:0006633|fatty acid biosynthetic process(RCA)	other cellular processes	P	GO:0002213|defense response to insect(RCA)	response to stress	P	GO:0006633|fatty acid biosynthetic process(RCA)	other metabolic processes	P	GO:0008152|metabolic process(ISS)	other metabolic processes	P	GO:0001676|long-chain fatty acid metabolic process(RCA)	other cellular processes	P	GO:0001676|long-chain fatty acid metabolic process(RCA)	other metabolic processes	P	GO:0002213|defense response to insect(RCA)	response to abiotic or biotic stimulus	F	GO:0008080|N-acetyltransferase activity(ISS)	transferase activity
AT2G13760	P	GO:0008150|biological_process(ND)	unknown biological processes	C	GO:0005575|cellular_component(ND)	unknown cellular components	F	GO:0003674|molecular_function(ND)	unknown molecular functions
AT3G55750	C	GO:0022626|cytosolic ribosome(IDA)	ribosome	P	GO:0042254|ribosome biogenesis(ISS)	other biological processes	C	GO:0022625|cytosolic large ribosomal subunit(IDA)	other cytoplasmic components	C	GO:0022625|cytosolic large ribosomal subunit(IDA)	other intracellular components	C	GO:0022626|cytosolic ribosome(IDA)	other intracellular components	C	GO:0022626|cytosolic ribosome(IDA)	other intracellular components	P	GO:0006412|translation(ISS)	other cellular processes	C	GO:0022625|cytosolic large ribosomal subunit(IDA)	cytosol	C	GO:0016020|membrane(IDA)	other membranes	C	GO:0022626|cytosolic ribosome(IDA)	other cytoplasmic components	C	GO:0005840|ribosome(ISS)	ribosome	P	GO:0006412|translation(ISS)	protein metabolism	P	GO:0006412|translation(ISS)	other metabolic processes	C	GO:0022626|cytosolic ribosome(IDA)	cytosol	C	GO:0022626|cytosolic ribosome(IDA)	cytosol	C	GO:0005737|cytoplasm(ISM)	other cytoplasmic components	C
AT1G18440	C	GO:0009507|chloroplast(ISM)	chloroplast	P	GO:0006783|heme biosynthetic process(RCA)	other cellular processes	P	GO:0006412|translation(ISS)	other metabolic processes	P	GO:0006412|translation(ISS)	protein metabolism	P	GO:0006412|translation(ISS)	other cellular processes	F	GO:0004045|aminoacyl-tRNA hydrolase activity(ISS)	hydrolase activity	C	GO:0009507|chloroplast(IDA)	chloroplast	P	GO:0006783|heme biosynthetic process(RCA)	other metabolic processes
AT3G11745	P	GO:0008150|biological_process(ND)	unknown biological processes	F	GO:0003674|molecular_function(ND)	unknown molecular functions	C	GO:0005739|mitochondrion(ISM)	mitochondria
AT5G08300	C	GO:0005739|mitochondrion(IDA)	mitochondria	P	GO:0009853|photorespiration(RCA)	other cellular processes	P	GO:0034976|response to endoplasmic reticulum stress(RCA)	other cellular processes	P	GO:0006511|ubiquitin-dependent protein catabolic process(RCA)	protein metabolism	P	GO:0034976|response to endoplasmic reticulum stress(RCA)	response to stress	P	GO:0006096|glycolytic process(RCA)	electron transport or energy pathways	P	GO:0006096|glycolytic process(RCA)	other metabolic processes	P	GO:0008152|metabolic process(ISS)	other metabolic processes	P	GO:0046686|response to cadmium ion(RCA)	other biological processes	P	GO:0080129|proteasome core complex assembly(RCA)	cell organization and biogenesis	P	GO:0009750|response to fructose(RCA)	other biological processes	C	GO:0005739|mitochondrion(ISM)	mitochondria	C	GO:0005739|mitochondrion(IDA)	mitochondria	C	GO:0005739|mitochondrion(IDA)	mitochondria	P	GO:0006094|gluconeogenesis(RCA)	other metabolic processes	P	GO:0009853|photorespiration(RCA)	other metabolic processes	C
ATMG01130	C	GO:0005739|mitochondrion(ISM)	mitochondria	P	GO:0008150|biological_process(ND)	unknown biological processes	F	GO:0003674|molecular_function(ND)	unknown molecular functions
AT2G46110	F	GO:0003864|3-methyl-2-oxobutanoate hydroxymethyltransferase activity(ISS)	transferase activity	P	GO:0015940|pantothenate biosynthetic process(ISS)	other cellular processes	F	GO:0003864|3-methyl-2-oxobutanoate hydroxymethyltransferase activity(IGI)	transferase activity	C	GO:0005739|mitochondrion(IDA)	mitochondria	P	GO:0015940|pantothenate biosynthetic process(IGI)	other metabolic processes	P	GO:0015940|pantothenate biosynthetic process(IGI)	other cellular processes	P	GO:0015940|pantothenate biosynthetic process(ISS)	other metabolic processes	C	GO:0009507|chloroplast(ISM)	chloroplast
AT1G53580	P	GO:0009651|response to salt stress(IEP)	response to stress	F	GO:0050313|sulfur dioxygenase activity(IDA)	other enzyme activity	P	GO:0009651|response to salt stress(IEP)	response to stress	P	GO:0019243|methylglyoxal catabolic process to D-lactate(ISS)	other cellular processes	P	GO:0055114|oxidation-reduction process(IDA)	other metabolic processes	P	GO:0009651|response to salt stress(IEP)	response to abiotic or biotic stimulus	F	GO:0004416|hydroxyacylglutathione hydrolase activity(ISS)	hydrolase activity	P	GO:0009960|endosperm development(IMP)	developmental processes	P	GO:0019243|methylglyoxal catabolic process to D-lactate(ISS)	other metabolic processes	F	GO:0016788|hydrolase activity, acting on ester bonds(IDA)	hydrolase activity	P	GO:0009793|embryo development ending in seed dormancy(IMP)	developmental processes	P	GO:0048316|seed development(IMP)	developmental processes	P	GO:0009651|response to salt stress(IEP)	response to abiotic or biotic stimulus	C	GO:0005739|mitochondrion(IDA)	mitochondria
AT3G48060	F	GO:0003677|DNA binding(ISS)	DNA or RNA binding	C	GO:0005576|extracellular region(ISM)	extracellular
AT5G18475	F	GO:0003674|molecular_function(ND)	unknown molecular functions	P	GO:0008150|biological_process(ND)	unknown biological processes	C	GO:0005739|mitochondrion(ISM)	mitochondria
AT2G22780	P	GO:0080093|regulation of photorespiration(IMP)	other cellular processes	P	GO:0006635|fatty acid beta-oxidation(RCA)	other metabolic processes	P	GO:0031998|regulation of fatty acid beta-oxidation(IGI)	other cellular processes	C	GO:0005777|peroxisome(IDA)	other cytoplasmic components	P	GO:0006635|fatty acid beta-oxidation(RCA)	other cellular processes	C	GO:0009507|chloroplast(IDA)	chloroplast	F	GO:0016615|malate dehydrogenase activity(ISS)	other enzyme activity	C	GO:0005777|peroxisome(IDA)	other intracellular components	P	GO:0007031|peroxisome organization(RCA)	cell organization and biogenesis	C	GO:0005777|peroxisome(IDA)	other intracellular components	P	GO:0031998|regulation of fatty acid beta-oxidation(IMP)	other cellular processes	C	GO:0005777|peroxisome(IDA)	other cytoplasmic components	C	GO:0005777|peroxisome(IDA)	other intracellular components	P	GO:0009062|fatty acid catabolic process(RCA)	other metabolic processes	P	GO:0009062|fatty acid catabolic process(RCA)	other cellular processes	C	GO:0005777|peroxisome(IDA)	other cytoplasmic components	C
AT1G41880	P	GO:0042254|ribosome biogenesis(ISS)	other biological processes	P	GO:0006412|translation(ISS)	other cellular processes	C	GO:0022625|cytosolic large ribosomal subunit(IDA)	other intracellular components	C	GO:0005737|cytoplasm(ISM)	other cytoplasmic components	C	GO:0005840|ribosome(ISS)	ribosome	C	GO:0022625|cytosolic large ribosomal subunit(IDA)	other cytoplasmic components	C	GO:0016020|membrane(IDA)	other membranes	P	GO:0006412|translation(ISS)	other metabolic processes	F	GO:0003735|structural constituent of ribosome(ISS)	structural molecule activity	C	GO:0022625|cytosolic large ribosomal subunit(IDA)	ribosome	C	GO:0022625|cytosolic large ribosomal subunit(IDA)	cytosol	P	GO:0006412|translation(ISS)	protein metabolism
AT4G21170	C	GO:0016020|membrane(IDA)	other membranes	C	GO:0009536|plastid(IDA)	plastid	C	GO:0005739|mitochondrion(ISM)	mitochondria	F	GO:0003674|molecular_function(ND)	unknown molecular functions	P	GO:0008150|biological_process(ND)	unknown biological processes	C	GO:0005739|mitochondrion(IDA)	mitochondria
AT3G48990	P	GO:0010167|response to nitrate(RCA)	other biological processes	P	GO:0046482|para-aminobenzoic acid metabolic process(RCA)	other cellular processes	P	GO:0033611|oxalate catabolic process(IDA)	other cellular processes	P	GO:0010214|seed coat development(IMP)	developmental processes	C	GO:0009570|chloroplast stroma(IDA)	other cytoplasmic components	C	GO:0009570|chloroplast stroma(IDA)	other intracellular components	F	GO:0016208|AMP binding(ISS)	other binding	C	GO:0048046|apoplast(IDA)	extracellular	C	GO:0009570|chloroplast stroma(IDA)	chloroplast	C	GO:0005739|mitochondrion(ISM)	mitochondria	P	GO:0015706|nitrate transport(RCA)	transport	F	GO:0050203|oxalate-CoA ligase activity(IDA)	other enzyme activity	C	GO:0009507|chloroplast(IDA)	chloroplast	F	GO:0016208|AMP binding(ISS)	nucleotide binding	C	GO:0009506|plasmodesma(IDA)	other cellular components	P	GO:0009735|response to cytokinin(IDA)	other biological processes	C
AT3G04020	C	GO:0005634|nucleus(ISM)	nucleus
AT3G50420	P	GO:0008150|biological_process(ND)	unknown biological processes	C	GO:0005739|mitochondrion(ISM)	mitochondria
AT1G55630	C	GO:0005739|mitochondrion(ISM)	mitochondria	P	GO:0008150|biological_process(ND)	unknown biological processes
AT3G58020	C	GO:0005634|nucleus(IDA)	nucleus	C	GO:0005737|cytoplasm(ISM)	other cytoplasmic components	P	GO:0006457|protein folding(ISS)	protein metabolism	P	GO:0006457|protein folding(ISS)	other metabolic processes	P	GO:0006457|protein folding(ISS)	other cellular processes
AT3G61440	P	GO:0006955|immune response(IMP)	other biological processes	P	GO:0019344|cysteine biosynthetic process(IDA)	other metabolic processes	P	GO:0019761|glucosinolate biosynthetic process(RCA)	other cellular processes	C	GO:0009507|chloroplast(IDA)	chloroplast	C	GO:0005739|mitochondrion(IDA)	mitochondria	P	GO:0019761|glucosinolate biosynthetic process(RCA)	other metabolic processes	P	GO:0019344|cysteine biosynthetic process(IDA)	other cellular processes	P	GO:0019288|isopentenyl diphosphate biosynthetic process, methylerythritol 4-phosphate pathway(RCA)	other metabolic processes	F	GO:0050017|L-3-cyanoalanine synthase activity(IDA)	other enzyme activity	F	GO:0004124|cysteine synthase activity(IDA)	other enzyme activity	C	GO:0009507|chloroplast(IDA)	chloroplast	P	GO:0051410|detoxification of nitrogen compound(TAS)	other metabolic processes	F	GO:0005507|copper ion binding(IDA)	other binding	P	GO:0009684|indoleacetic acid biosynthetic process(RCA)	other metabolic processes	P	GO:0080147|root hair cell development(IMP)	developmental processes	P	GO:0009684|indoleacetic acid biosynthetic process(RCA)	other cellular processes	P
AT1G09300	C	GO:0005739|mitochondrion(ISM)	mitochondria	F	GO:0008237|metallopeptidase activity(ISS)	hydrolase activity	C	GO:0005739|mitochondrion(ISM)	mitochondria
AT3G11460	C	GO:0005739|mitochondrion(ISM)	mitochondria	P	GO:0016554|cytidine to uridine editing(IMP)	other cellular processes	P	GO:0016554|cytidine to uridine editing(IMP)	other metabolic processes
AT1G62930	P	GO:0006397|mRNA processing(IMP)	other cellular processes	C	GO:0005739|mitochondrion(ISM)	mitochondria	P	GO:0006397|mRNA processing(IMP)	other metabolic processes	C	GO:0005739|mitochondrion(IDA)	mitochondria
AT1G08630	P	GO:0006567|threonine catabolic process(IMP)	other metabolic processes	C	GO:0005737|cytoplasm(ISM)	other cytoplasmic components	C	GO:0005737|cytoplasm(ISM)	other cytoplasmic components	P	GO:0006567|threonine catabolic process(RCA)	other cellular processes	P	GO:0009744|response to sucrose(RCA)	other biological processes	C	GO:0005737|cytoplasm(ISM)	other cytoplasmic components	C	GO:0005737|cytoplasm(ISM)	other cytoplasmic components	P	GO:0006567|threonine catabolic process(IMP)	other cellular processes	P	GO:0009750|response to fructose(RCA)	other biological processes	F	GO:0004793|threonine aldolase activity(IDA)	other enzyme activity	F	GO:0016832|aldehyde-lyase activity(ISS)	other enzyme activity	P	GO:0006567|threonine catabolic process(RCA)	other metabolic processes
AT1G65080	C	GO:0016020|membrane(ISS)	other membranes
AT1G50940	C	GO:0005739|mitochondrion(IDA)	mitochondria	C	GO:0005739|mitochondrion(ISM)	mitochondria	C	GO:0005739|mitochondrion(IDA)	mitochondria	F	GO:0005507|copper ion binding(IDA)	other binding
AT4G35850	P	GO:0034968|histone lysine methylation(RCA)	protein metabolism	P	GO:0034968|histone lysine methylation(RCA)	cell organization and biogenesis	P	GO:0034968|histone lysine methylation(RCA)	other cellular processes	P	GO:0010388|cullin deneddylation(RCA)	protein metabolism	P	GO:0009640|photomorphogenesis(RCA)	response to abiotic or biotic stimulus	F	GO:0003674|molecular_function(ND)	unknown molecular functions	C	GO:0005739|mitochondrion(IDA)	mitochondria	C	GO:0005739|mitochondrion(IDA)	mitochondria	P	GO:0034968|histone lysine methylation(RCA)	other metabolic processes	P	GO:0009909|regulation of flower development(RCA)	developmental processes	P	GO:0009640|photomorphogenesis(RCA)	developmental processes	C	GO:0005739|mitochondrion(ISM)	mitochondria	P	GO:0010388|cullin deneddylation(RCA)	other metabolic processes	P	GO:0009220|pyrimidine ribonucleotide biosynthetic process(RCA)	other metabolic processes	P	GO:0009220|pyrimidine ribonucleotide biosynthetic process(RCA)	other cellular processes	P	GO:0010388|cullin deneddylation(RCA)	other cellular processes
AT3G46790	P	GO:0030422|production of siRNA involved in RNA interference(RCA)	other cellular processes	P	GO:0035196|production of miRNAs involved in gene silencing by miRNA(RCA)	other cellular processes	P	GO:0006355|regulation of transcription, DNA-templated(RCA)	other cellular processes	C	GO:0009507|chloroplast(ISS)	chloroplast	P	GO:0031425|chloroplast RNA processing(IMP)	other metabolic processes	P	GO:0000398|mRNA splicing, via spliceosome(RCA)	other metabolic processes	P	GO:0045893|positive regulation of transcription, DNA-templated(RCA)	transcription,DNA-dependent	P	GO:0043687|post-translational protein modification(RCA)	protein metabolism	P	GO:0043687|post-translational protein modification(RCA)	other cellular processes	P	GO:0006355|regulation of transcription, DNA-templated(RCA)	transcription,DNA-dependent	P	GO:0006355|regulation of transcription, DNA-templated(RCA)	other metabolic processes	P	GO:0045893|positive regulation of transcription, DNA-templated(RCA)	other cellular processes	P	GO:0030422|production of siRNA involved in RNA interference(RCA)	other metabolic processes	P	GO:0045893|positive regulation of transcription, DNA-templated(RCA)	other metabolic processes	P	GO:0031426|polycistronic mRNA processing(IMP)	other metabolic processes	P	GO:0031425|chloroplast RNA processing(IMP)	other cellular processes	P
AT1G07040	P	GO:0008150|biological_process(ND)	unknown biological processes	C	GO:0009507|chloroplast(ISM)	chloroplast
AT1G72020	P	GO:0008150|biological_process(ND)	unknown biological processes	F	GO:0003674|molecular_function(ND)	unknown molecular functions	P	GO:0009853|photorespiration(RCA)	other metabolic processes	P	GO:0006511|ubiquitin-dependent protein catabolic process(RCA)	protein metabolism	P	GO:0006511|ubiquitin-dependent protein catabolic process(RCA)	other metabolic processes	P	GO:0006511|ubiquitin-dependent protein catabolic process(RCA)	other cellular processes	P	GO:0051788|response to misfolded protein(RCA)	response to stress	P	GO:0080129|proteasome core complex assembly(RCA)	cell organization and biogenesis	P	GO:0009853|photorespiration(RCA)	other cellular processes
AT1G06200	C	GO:0005739|mitochondrion(ISM)	mitochondria
AT4G39740	P	GO:0055070|copper ion homeostasis(IMP)	other biological processes	C	GO:0005739|mitochondrion(ISM)	mitochondria	F	GO:0003674|molecular_function(ND)	unknown molecular functions
AT1G61640	C	GO:0005886|plasma membrane(ISM)	plasma membrane	C	GO:0005886|plasma membrane(ISM)	plasma membrane
AT5G45470	P	GO:0008150|biological_process(ND)	unknown biological processes	F	GO:0003674|molecular_function(ND)	unknown molecular functions	C	GO:0005886|plasma membrane(IDA)	plasma membrane	C	GO:0005886|plasma membrane(IDA)	plasma membrane
AT5G24593	C	GO:0005739|mitochondrion(ISM)	mitochondria
ATMG00820	P	GO:0008150|biological_process(ND)	unknown biological processes	F	GO:0003674|molecular_function(ND)	unknown molecular functions
AT5G28340	C	GO:0005739|mitochondrion(ISM)	mitochondria	P	GO:0008150|biological_process(ND)	unknown biological processes
AT2G37310	P	GO:0008150|biological_process(ND)	unknown biological processes	C	GO:0005739|mitochondrion(ISM)	mitochondria
AT2G19290	P	GO:0008150|biological_process(ND)	unknown biological processes	C	GO:0005739|mitochondrion(ISM)	mitochondria	F	GO:0003674|molecular_function(ND)	unknown molecular functions
AT1G56085	C	GO:0005575|cellular_component(ND)	unknown cellular components
AT2G25510	C	GO:0005739|mitochondrion(ISM)	mitochondria	P	GO:0008150|biological_process(ND)	unknown biological processes	F	GO:0003674|molecular_function(ND)	unknown molecular functions	C	GO:0005739|mitochondrion(ISM)	mitochondria
AT2G01140	C	GO:0010287|plastoglobule(IDA)	other cytoplasmic components	C	GO:0009570|chloroplast stroma(IDA)	chloroplast	P	GO:0046686|response to cadmium ion(IEP)	other biological processes	C	GO:0010287|plastoglobule(IDA)	chloroplast	P	GO:0006098|pentose-phosphate shunt(RCA)	other cellular processes	F	GO:0004332|fructose-bisphosphate aldolase activity(ISS)	other enzyme activity	C	GO:0009570|chloroplast stroma(IDA)	plastid	C	GO:0010287|plastoglobule(IDA)	other intracellular components	P	GO:0006098|pentose-phosphate shunt(TAS)	other cellular processes	C	GO:0010287|plastoglobule(IDA)	plastid	C	GO:0005739|mitochondrion(IDA)	mitochondria	C	GO:0009534|chloroplast thylakoid(IDA)	plastid	C	GO:0010287|plastoglobule(IDA)	plastid	C	GO:0009570|chloroplast stroma(IDA)	other cytoplasmic components	C	GO:0010287|plastoglobule(IDA)	other cytoplasmic components	C	GO:0010287|plastoglobule(IDA)	plastid	P
AT4G32450	C	GO:0005739|mitochondrion(ISM)	mitochondria	P	GO:0008150|biological_process(ND)	unknown biological processes
AT3G56820	C	GO:0005802|trans-Golgi network(IDA)	Golgi apparatus	C	GO:0005768|endosome(IDA)	other intracellular components	C	GO:0005768|endosome(IDA)	other cytoplasmic components	C	GO:0005802|trans-Golgi network(IDA)	other cytoplasmic components	C	GO:0005794|Golgi apparatus(IDA)	Golgi apparatus	P	GO:0008150|biological_process(ND)	unknown biological processes	F	GO:0003674|molecular_function(ND)	unknown molecular functions	C	GO:0005794|Golgi apparatus(IDA)	Golgi apparatus	C	GO:0005739|mitochondrion(ISM)	mitochondria	C	GO:0005802|trans-Golgi network(IDA)	other intracellular components
AT5G35195	C	GO:0005739|mitochondrion(ISM)	mitochondria
AT1G60720	P	GO:0008150|biological_process(ND)	unknown biological processes
AT5G53920	P	GO:0006744|ubiquinone biosynthetic process(RCA)	other metabolic processes	P	GO:0006744|ubiquinone biosynthetic process(RCA)	other cellular processes
AT3G45673	C	GO:0005739|mitochondrion(ISM)	mitochondria	F	GO:0003674|molecular_function(ND)	unknown molecular functions	P	GO:0008150|biological_process(ND)	unknown biological processes
AT3G49170	C	GO:0009507|chloroplast(ISM)	chloroplast	P	GO:0009793|embryo development ending in seed dormancy(IMP)	developmental processes	P	GO:0009793|embryo development ending in seed dormancy(NAS)	developmental processes
AT5G55200	P	GO:0009407|toxin catabolic process(RCA)	other cellular processes	F	GO:0005507|copper ion binding(IDA)	other binding	P	GO:0009411|response to UV(IEP)	response to abiotic or biotic stimulus	C	GO:0005739|mitochondrion(IDA)	mitochondria	C	GO:0005739|mitochondrion(IDA)	mitochondria	P	GO:0006457|protein folding(ISS)	other metabolic processes	C	GO:0009507|chloroplast(ISM)	chloroplast	F	GO:0005524|ATP binding(IDA)	other binding	P	GO:0006457|protein folding(ISS)	other cellular processes	P	GO:0006457|protein folding(ISS)	protein metabolism	C	GO:0005739|mitochondrion(IDA)	mitochondria	P	GO:0010583|response to cyclopentenone(RCA)	other biological processes	F	GO:0005524|ATP binding(IDA)	nucleotide binding	P	GO:0009407|toxin catabolic process(RCA)	other metabolic processes
AT3G47836	F	GO:0003674|molecular_function(ND)	unknown molecular functions	P	GO:0008150|biological_process(ND)	unknown biological processes
AT2G15690	C	GO:0005739|mitochondrion(ISM)	mitochondria	F	GO:0003674|molecular_function(ND)	unknown molecular functions	P	GO:0008150|biological_process(ND)	unknown biological processes
AT2G34520	C	GO:0005763|mitochondrial small ribosomal subunit(TAS)	other cytoplasmic components	F	GO:0003735|structural constituent of ribosome(TAS)	structural molecule activity	P	GO:0009853|photorespiration(RCA)	other cellular processes	P	GO:0006412|translation(TAS)	other cellular processes	P	GO:0006354|DNA-templated transcription, elongation(RCA)	other metabolic processes	P	GO:0009853|photorespiration(RCA)	other metabolic processes	C	GO:0005739|mitochondrion(TAS)	mitochondria	P	GO:0006354|DNA-templated transcription, elongation(RCA)	transcription,DNA-dependent	P	GO:0006412|translation(TAS)	protein metabolism	P	GO:0006412|translation(TAS)	other metabolic processes	C	GO:0005763|mitochondrial small ribosomal subunit(TAS)	ribosome	C	GO:0005763|mitochondrial small ribosomal subunit(TAS)	mitochondria	C	GO:0009507|chloroplast(ISM)	chloroplast	P	GO:0006354|DNA-templated transcription, elongation(RCA)	other cellular processes	C	GO:0005763|mitochondrial small ribosomal subunit(TAS)	other intracellular components
AT2G26140	C	GO:0005739|mitochondrion(IDA)	mitochondria	C	GO:0009536|plastid(IDA)	plastid	C	GO:0005739|mitochondrion(IDA)	mitochondria	C	GO:0016020|membrane(IDA)	other membranes	F	GO:0004176|ATP-dependent peptidase activity(ISS)	hydrolase activity	F	GO:0016887|ATPase activity(ISS)	hydrolase activity	F	GO:0008237|metallopeptidase activity(ISS)	hydrolase activity	C	GO:0005739|mitochondrion(ISM)	mitochondria	C	GO:0005739|mitochondrion(IDA)	mitochondria
AT5G57700	C	GO:0005575|cellular_component(ND)	unknown cellular components	P	GO:0008150|biological_process(ND)	unknown biological processes
AT5G16140	F	GO:0004045|aminoacyl-tRNA hydrolase activity(ISS)	hydrolase activity	C	GO:0009507|chloroplast(ISM)	chloroplast	P	GO:0006783|heme biosynthetic process(RCA)	other cellular processes	P	GO:0006412|translation(ISS)	other metabolic processes	P	GO:0006412|translation(ISS)	protein metabolism	P	GO:0006412|translation(ISS)	other cellular processes	P	GO:0006783|heme biosynthetic process(RCA)	other metabolic processes	C	GO:0009507|chloroplast(ISM)	chloroplast
AT4G21090	C	GO:0005739|mitochondrion(ISM)	mitochondria	C	GO:0005739|mitochondrion(ISM)	mitochondria	F	GO:0009055|electron carrier activity(ISS)	other molecular functions	P	GO:0019243|methylglyoxal catabolic process to D-lactate(RCA)	other metabolic processes	P	GO:0019243|methylglyoxal catabolic process to D-lactate(RCA)	other cellular processes	C	GO:0005739|mitochondrion(ISM)	mitochondria
AT4G36510	F	GO:0003674|molecular_function(ND)	unknown molecular functions	P	GO:0008150|biological_process(ND)	unknown biological processes	C	GO:0005739|mitochondrion(ISM)	mitochondria
AT2G07695	F	GO:0005507|copper ion binding(ISS)	other binding	F	GO:0004129|cytochrome-c oxidase activity(ISS)	transporter activity	F	GO:0004129|cytochrome-c oxidase activity(ISS)	other enzyme activity	C	GO:0005739|mitochondrion(ISM)	mitochondria	C	GO:0016020|membrane(ISS)	other membranes
AT1G68990	P	GO:0006351|transcription, DNA-templated(ISS)	transcription,DNA-dependent	P	GO:0009860|pollen tube growth(IMP)	other cellular processes	F	GO:0003677|DNA binding(ISS)	DNA or RNA binding	P	GO:0009860|pollen tube growth(IMP)	cell organization and biogenesis	P	GO:0009793|embryo development ending in seed dormancy(IMP)	developmental processes	F	GO:0003899|DNA-directed RNA polymerase activity(ISS)	transferase activity	P	GO:0048481|ovule development(IMP)	developmental processes
AT1G20270	C	GO:0005802|trans-Golgi network(IDA)	other intracellular components	P	GO:0018401|peptidyl-proline hydroxylation to 4-hydroxy-L-proline(ISS)	other cellular processes	C	GO:0005802|trans-Golgi network(IDA)	other cytoplasmic components	C	GO:0005768|endosome(IDA)	other intracellular components	P	GO:0018401|peptidyl-proline hydroxylation to 4-hydroxy-L-proline(ISS)	other metabolic processes	F	GO:0016706|oxidoreductase activity, acting on paired donors, with incorporation or reduction of molecular oxygen, 2-oxoglutarate as one donor, and incorporation of one atom each of oxygen into both donors(ISS)	other enzyme activity	C	GO:0005768|endosome(IDA)	other cytoplasmic components	C	GO:0005802|trans-Golgi network(IDA)	Golgi apparatus	C	GO:0005739|mitochondrion(ISM)	mitochondria	P	GO:0018401|peptidyl-proline hydroxylation to 4-hydroxy-L-proline(ISS)	protein metabolism	C	GO:0005794|Golgi apparatus(IDA)	Golgi apparatus
AT4G22220	P	GO:0016226|iron-sulfur cluster assembly(IGI)	cell organization and biogenesis	C	GO:0005739|mitochondrion(ISM)	mitochondria	F	GO:0005198|structural molecule activity(ISS)	structural molecule activity	C	GO:0005739|mitochondrion(IDA)	mitochondria	P	GO:0016226|iron-sulfur cluster assembly(ISS)	other metabolic processes	P	GO:0016226|iron-sulfur cluster assembly(IGI)	other metabolic processes	P	GO:0016226|iron-sulfur cluster assembly(ISS)	cell organization and biogenesis
AT2G04540	P	GO:0042335|cuticle development(RCA)	developmental processes	P	GO:0000038|very long-chain fatty acid metabolic process(RCA)	other cellular processes	P	GO:0009409|response to cold(RCA)	response to stress	F	GO:0004312|fatty acid synthase activity(ISS)	transferase activity	P	GO:0000038|very long-chain fatty acid metabolic process(RCA)	other metabolic processes	P	GO:0009409|response to cold(RCA)	response to abiotic or biotic stimulus	C	GO:0005739|mitochondrion(ISM)	mitochondria
AT5G48040	No annotation
AT4G29760	F	GO:0003674|molecular_function(ND)	unknown molecular functions	C	GO:0005575|cellular_component(ND)	unknown cellular components	P	GO:0008150|biological_process(ND)	unknown biological processes
AT2G01175	C	GO:0005739|mitochondrion(ISM)	mitochondria	P	GO:0008150|biological_process(ND)	unknown biological processes	F	GO:0003674|molecular_function(ND)	unknown molecular functions	F	GO:0003674|molecular_function(ND)	unknown molecular functions
AT2G20060	F	GO:0003735|structural constituent of ribosome(ISS)	structural molecule activity	C	GO:0015934|large ribosomal subunit(ISS)	other cytoplasmic components	P	GO:0006354|DNA-templated transcription, elongation(RCA)	other cellular processes	P	GO:0006412|translation(ISS)	other metabolic processes	P	GO:0006354|DNA-templated transcription, elongation(RCA)	transcription,DNA-dependent	P	GO:0006354|DNA-templated transcription, elongation(RCA)	other metabolic processes	C	GO:0015934|large ribosomal subunit(ISS)	other intracellular components	P	GO:0006412|translation(ISS)	protein metabolism	C	GO:0005739|mitochondrion(ISM)	mitochondria	C	GO:0015934|large ribosomal subunit(ISS)	ribosome	P	GO:0006412|translation(ISS)	other cellular processes
AT2G34630	C	GO:0005739|mitochondrion(ISM)	mitochondria	C	GO:0009536|plastid(IDA)	plastid	C	GO:0009507|chloroplast(IDA)	chloroplast	F	GO:0004161|dimethylallyltranstransferase activity(IDA)	transferase activity	C	GO:0005739|mitochondrion(ISM)	mitochondria	C	GO:0009536|plastid(IDA)	plastid	F	GO:0004659|prenyltransferase activity(IDA)	transferase activity	C	GO:0005739|mitochondrion(IDA)	mitochondria	F	GO:0050347|trans-octaprenyltranstransferase activity(IMP)	transferase activity	P	GO:0006744|ubiquinone biosynthetic process(IMP)	other metabolic processes	F	GO:0004161|dimethylallyltranstransferase activity(IGI)	transferase activity	P	GO:0006744|ubiquinone biosynthetic process(IMP)	other cellular processes
AT1G51355	P	GO:0008150|biological_process(ND)	unknown biological processes	F	GO:0003674|molecular_function(ND)	unknown molecular functions	C	GO:0005739|mitochondrion(ISM)	mitochondria
ATMG00890	F	GO:0003674|molecular_function(ND)	unknown molecular functions	P	GO:0008150|biological_process(ND)	unknown biological processes	C	GO:0005739|mitochondrion(ISM)	mitochondria
AT3G43810	P	GO:0010099|regulation of photomorphogenesis(IMP)	response to abiotic or biotic stimulus	F	GO:0005515|protein binding(IPI)	protein binding	F	GO:0005515|protein binding(IPI)	protein binding	C	GO:0005737|cytoplasm(ISM)	other cytoplasmic components	P	GO:0005513|detection of calcium ion(ISS)	other biological processes	P	GO:0019722|calcium-mediated signaling(IGI)	signal transduction	F	GO:0005515|protein binding(IPI)	protein binding	P	GO:0006084|acetyl-CoA metabolic process(RCA)	other metabolic processes	F	GO:0005515|protein binding(IPI)	protein binding	F	GO:0005515|protein binding(IPI)	protein binding	F	GO:0005515|protein binding(IPI)	protein binding	P	GO:0019722|calcium-mediated signaling(RCA)	signal transduction	P	GO:0019932|second-messenger-mediated signaling(RCA)	signal transduction	F	GO:0005515|protein binding(IPI)	protein binding	P	GO:0010099|regulation of photomorphogenesis(IMP)	developmental processes	F	GO:0005515|protein binding(IPI)	protein binding	P
AT1G80620	F	GO:0003735|structural constituent of ribosome(ISS)	structural molecule activity	C	GO:0015935|small ribosomal subunit(ISS)	ribosome	C	GO:0015935|small ribosomal subunit(ISS)	other intracellular components	P	GO:0048825|cotyledon development(RCA)	developmental processes	C	GO:0015935|small ribosomal subunit(ISS)	other cytoplasmic components	P	GO:0006412|translation(ISS)	other metabolic processes	P	GO:0006412|translation(ISS)	other cellular processes	P	GO:0006396|RNA processing(RCA)	other cellular processes	P	GO:0009560|embryo sac egg cell differentiation(RCA)	developmental processes	P	GO:0051301|cell division(RCA)	other cellular processes	P	GO:0009560|embryo sac egg cell differentiation(RCA)	other cellular processes	C	GO:0009507|chloroplast(ISM)	chloroplast	P	GO:0006412|translation(ISS)	protein metabolism	P	GO:0000278|mitotic cell cycle(RCA)	other cellular processes	P	GO:0006396|RNA processing(RCA)	other metabolic processes
AT5G09420	P	GO:0015696|ammonium transport(RCA)	transport	P	GO:0006612|protein targeting to membrane(RCA)	transport	P	GO:0006612|protein targeting to membrane(RCA)	other cellular processes	P	GO:0006626|protein targeting to mitochondrion(RCA)	other cellular processes	C	GO:0005739|mitochondrion(IDA)	mitochondria	P	GO:0006626|protein targeting to mitochondrion(IMP)	transport	P	GO:0010363|regulation of plant-type hypersensitive response(RCA)	other cellular processes	P	GO:0006820|anion transport(RCA)	transport	P	GO:0015802|basic amino acid transport(RCA)	transport	P	GO:0006612|protein targeting to membrane(RCA)	cell organization and biogenesis	P	GO:0006626|protein targeting to mitochondrion(RCA)	transport	P	GO:0006888|ER to Golgi vesicle-mediated transport(RCA)	transport	P	GO:0010363|regulation of plant-type hypersensitive response(RCA)	response to stress	P	GO:0043269|regulation of ion transport(RCA)	transport	P	GO:0006626|protein targeting to mitochondrion(IMP)	cell organization and biogenesis	P	GO:0006626|protein targeting to mitochondrion(IMP)	other cellular processes	C
AT4G25200	P	GO:0009408|response to heat(ISS)	response to stress	P	GO:0034976|response to endoplasmic reticulum stress(RCA)	other cellular processes	P	GO:0006457|protein folding(RCA)	other cellular processes	P	GO:0006457|protein folding(RCA)	protein metabolism	F	GO:0003674|molecular_function(ND)	unknown molecular functions	P	GO:0009408|response to heat(ISS)	response to abiotic or biotic stimulus	P	GO:0009408|response to heat(RCA)	response to abiotic or biotic stimulus	P	GO:0046686|response to cadmium ion(IEP)	other biological processes	P	GO:0009644|response to high light intensity(RCA)	response to abiotic or biotic stimulus	P	GO:0006457|protein folding(RCA)	other metabolic processes	P	GO:0034976|response to endoplasmic reticulum stress(RCA)	response to stress	P	GO:0009408|response to heat(RCA)	response to stress	P	GO:0042542|response to hydrogen peroxide(RCA)	response to stress	C	GO:0005739|mitochondrion(ISM)	mitochondria
AT3G18760	F	GO:0003735|structural constituent of ribosome(ISS)	structural molecule activity	C	GO:0005840|ribosome(ISS)	ribosome	P	GO:0006412|translation(ISS)	protein metabolism	P	GO:0006412|translation(ISS)	other metabolic processes	P	GO:0006412|translation(ISS)	other cellular processes
AT1G17830	C	GO:0005634|nucleus(ISM)	nucleus	F	GO:0003674|molecular_function(ND)	unknown molecular functions	P	GO:0008150|biological_process(ND)	unknown biological processes
AT3G04230	C	GO:0022627|cytosolic small ribosomal subunit(ISS)	ribosome	C	GO:0022627|cytosolic small ribosomal subunit(IDA)	other intracellular components	C	GO:0022626|cytosolic ribosome(IDA)	other cytoplasmic components	P	GO:0006412|translation(ISS)	other metabolic processes	C	GO:0022627|cytosolic small ribosomal subunit(IDA)	other cytoplasmic components	C	GO:0005730|nucleolus(IDA)	nucleus	C	GO:0005730|nucleolus(IDA)	other intracellular components	C	GO:0022626|cytosolic ribosome(IDA)	ribosome	C	GO:0022626|cytosolic ribosome(IDA)	other intracellular components	C	GO:0022627|cytosolic small ribosomal subunit(ISS)	cytosol	C	GO:0016020|membrane(IDA)	other membranes	C	GO:0009507|chloroplast(IDA)	chloroplast	P	GO:0006412|translation(ISS)	other cellular processes	C	GO:0005829|cytosol(IDA)	cytosol	F	GO:0003735|structural constituent of ribosome(ISS)	structural molecule activity	P	GO:0006412|translation(ISS)	protein metabolism	C
AT2G31130	F	GO:0003674|molecular_function(ND)	unknown molecular functions	P	GO:0008150|biological_process(ND)	unknown biological processes	C	GO:0005634|nucleus(ISM)	nucleus
AT2G02980	C	GO:0005739|mitochondrion(ISM)	mitochondria	P	GO:0031425|chloroplast RNA processing(IMP)	other metabolic processes	C	GO:0009507|chloroplast(IDA)	chloroplast	P	GO:0016556|mRNA modification(RCA)	other metabolic processes	P	GO:0031425|chloroplast RNA processing(IMP)	other cellular processes	P	GO:0016556|mRNA modification(RCA)	other cellular processes
AT1G09820	F	GO:0003674|molecular_function(ND)	unknown molecular functions	P	GO:0008150|biological_process(ND)	unknown biological processes	C	GO:0005739|mitochondrion(ISM)	mitochondria
AT1G35430	P	GO:0006661|phosphatidylinositol biosynthetic process(RCA)	other cellular processes	P	GO:0008150|biological_process(ND)	unknown biological processes	P	GO:0006661|phosphatidylinositol biosynthetic process(RCA)	other metabolic processes	F	GO:0003674|molecular_function(ND)	unknown molecular functions
AT3G51610	C	GO:0005886|plasma membrane(IDA)	plasma membrane	P	GO:0006979|response to oxidative stress(IMP)	response to stress	F	GO:0003674|molecular_function(ND)	unknown molecular functions	P	GO:0009555|pollen development(IMP)	developmental processes
AT3G15710	C	GO:0005774|vacuolar membrane(IDA)	other cytoplasmic components	C	GO:0016020|membrane(ISS)	other membranes	C	GO:0005774|vacuolar membrane(IDA)	other intracellular components	C	GO:0005886|plasma membrane(IDA)	plasma membrane	C	GO:0005783|endoplasmic reticulum(IDA)	ER	C	GO:0005783|endoplasmic reticulum(IDA)	ER	P	GO:0006508|proteolysis(ISS)	protein metabolism	C	GO:0009507|chloroplast(ISM)	chloroplast	F	GO:0008233|peptidase activity(ISS)	hydrolase activity	C	GO:0005774|vacuolar membrane(IDA)	other membranes
AT4G28830	C	GO:0005737|cytoplasm(ISM)	other cytoplasmic components	C	GO:0005737|cytoplasm(ISM)	other cytoplasmic components
AT5G05930	F	GO:0003674|molecular_function(ND)	unknown molecular functions	C	GO:0005634|nucleus(ISM)	nucleus	P	GO:0008150|biological_process(ND)	unknown biological processes
AT4G00100	C	GO:0022627|cytosolic small ribosomal subunit(ISS)	ribosome	P	GO:0006412|translation(ISS)	other metabolic processes	C	GO:0009507|chloroplast(ISM)	chloroplast	P	GO:0009664|plant-type cell wall organization(RCA)	other cellular processes	P	GO:0001510|RNA methylation(RCA)	other cellular processes	C	GO:0022627|cytosolic small ribosomal subunit(NAS)	ribosome	P	GO:0042545|cell wall modification(RCA)	cell organization and biogenesis	P	GO:0006412|translation(TAS)	other metabolic processes	F	GO:0003735|structural constituent of ribosome(ISS)	structural molecule activity	P	GO:0006412|translation(ISS)	protein metabolism	C	GO:0022627|cytosolic small ribosomal subunit(IDA)	other intracellular components	C	GO:0022627|cytosolic small ribosomal subunit(ISS)	other intracellular components	P	GO:0006412|translation(TAS)	protein metabolism	C	GO:0022627|cytosolic small ribosomal subunit(IDA)	cytosol	P	GO:0006412|translation(TAS)	other cellular processes	P	GO:0009965|leaf morphogenesis(IMP)	developmental processes	P
AT1G73210	F	GO:0003674|molecular_function(ND)	unknown molecular functions	P	GO:0008150|biological_process(ND)	unknown biological processes	C	GO:0005634|nucleus(ISM)	nucleus	C	GO:0005634|nucleus(ISM)	nucleus
AT5G63135	P	GO:0008150|biological_process(ND)	unknown biological processes	C	GO:0009507|chloroplast(ISM)	chloroplast	F	GO:0003674|molecular_function(ND)	unknown molecular functions
AT2G42210	C	GO:0009527|plastid outer membrane(ISS)	other cytoplasmic components	C	GO:0016020|membrane(IDA)	other membranes	C	GO:0005739|mitochondrion(IDA)	mitochondria	C	GO:0005747|mitochondrial respiratory chain complex I(IDA)	mitochondria	C	GO:0016020|membrane(IDA)	other membranes	P	GO:0080129|proteasome core complex assembly(RCA)	cell organization and biogenesis	C	GO:0005747|mitochondrial respiratory chain complex I(IDA)	other cytoplasmic components	C	GO:0005739|mitochondrion(ISM)	mitochondria	P	GO:0006511|ubiquitin-dependent protein catabolic process(RCA)	other metabolic processes	P	GO:0006511|ubiquitin-dependent protein catabolic process(RCA)	other cellular processes	C	GO:0009527|plastid outer membrane(ISS)	plastid	P	GO:0006511|ubiquitin-dependent protein catabolic process(RCA)	protein metabolism	C	GO:0005739|mitochondrion(ISM)	mitochondria	C	GO:0016020|membrane(IDA)	other membranes	C	GO:0009527|plastid outer membrane(ISS)	other intracellular components	C	GO:0005747|mitochondrial respiratory chain complex I(IDA)	other membranes	F
AT2G34370	C	GO:0005739|mitochondrion(ISM)	mitochondria	P	GO:0008150|biological_process(ND)	unknown biological processes
AT4G31850	P	GO:0008150|biological_process(ND)	unknown biological processes	P	GO:0006655|phosphatidylglycerol biosynthetic process(RCA)	other cellular processes	P	GO:0046777|protein autophosphorylation(RCA)	other metabolic processes	P	GO:0000023|maltose metabolic process(RCA)	other metabolic processes	P	GO:0005982|starch metabolic process(RCA)	other cellular processes	P	GO:0006098|pentose-phosphate shunt(RCA)	other metabolic processes	P	GO:0046777|protein autophosphorylation(RCA)	protein metabolism	P	GO:0046777|protein autophosphorylation(RCA)	other cellular processes	P	GO:0009902|chloroplast relocation(RCA)	cell organization and biogenesis	P	GO:0009664|plant-type cell wall organization(RCA)	other cellular processes	P	GO:0034660|ncRNA metabolic process(RCA)	other cellular processes	P	GO:0009664|plant-type cell wall organization(RCA)	cell organization and biogenesis	P	GO:0009902|chloroplast relocation(RCA)	other cellular processes	P	GO:0019252|starch biosynthetic process(RCA)	other metabolic processes	P	GO:0010075|regulation of meristem growth(RCA)	developmental processes	P	GO:0006655|phosphatidylglycerol biosynthetic process(RCA)	other metabolic processes	P
AT1G01840	P	GO:0008150|biological_process(ND)	unknown biological processes	C	GO:0009507|chloroplast(ISM)	chloroplast	F	GO:0003674|molecular_function(ND)	unknown molecular functions
AT4G19070	C	GO:0005739|mitochondrion(ISM)	mitochondria	P	GO:0008150|biological_process(ND)	unknown biological processes	F	GO:0003674|molecular_function(ND)	unknown molecular functions
AT4G36680	P	GO:0006626|protein targeting to mitochondrion(RCA)	other cellular processes	P	GO:0006626|protein targeting to mitochondrion(RCA)	transport	P	GO:0006626|protein targeting to mitochondrion(RCA)	cell organization and biogenesis	P	GO:0008150|biological_process(ND)	unknown biological processes	C	GO:0005739|mitochondrion(IDA)	mitochondria	C	GO:0005739|mitochondrion(ISM)	mitochondria
AT3G56030	C	GO:0005739|mitochondrion(ISM)	mitochondria	P	GO:0008150|biological_process(ND)	unknown biological processes	F	GO:0003674|molecular_function(ND)	unknown molecular functions
AT3G62560	C	GO:0005737|cytoplasm(ISM)	other cytoplasmic components
AT3G17465	P	GO:0006412|translation(NAS)	other cellular processes	C	GO:0005840|ribosome(NAS)	ribosome	P	GO:0006412|translation(NAS)	protein metabolism	C	GO:0005840|ribosome(ISS)	ribosome	C	GO:0005739|mitochondrion(IDA)	mitochondria	P	GO:0006412|translation(NAS)	other metabolic processes	P	GO:0006412|translation(ISS)	other metabolic processes	P	GO:0006412|translation(ISS)	other cellular processes	C	GO:0005739|mitochondrion(ISM)	mitochondria	F	GO:0003735|structural constituent of ribosome(NAS)	structural molecule activity	F	GO:0003735|structural constituent of ribosome(ISS)	structural molecule activity	P	GO:0006412|translation(ISS)	protein metabolism
AT1G62530	F	GO:0003674|molecular_function(ND)	unknown molecular functions	C	GO:0005575|cellular_component(ND)	unknown cellular components	P	GO:0008150|biological_process(ND)	unknown biological processes
AT4G38930	P	GO:0006511|ubiquitin-dependent protein catabolic process(ISS)	other metabolic processes	C	GO:0005634|nucleus(ISM)	nucleus	P	GO:0006511|ubiquitin-dependent protein catabolic process(ISS)	other cellular processes	P	GO:0006511|ubiquitin-dependent protein catabolic process(ISS)	protein metabolism	F	GO:0003674|molecular_function(ND)	unknown molecular functions	C	GO:0005634|nucleus(ISM)	nucleus
AT5G59900	P	GO:0008150|biological_process(ND)	unknown biological processes	F	GO:0003674|molecular_function(ND)	unknown molecular functions	C	GO:0005739|mitochondrion(ISM)	mitochondria
AT5G02240	C	GO:0009570|chloroplast stroma(IDA)	other cytoplasmic components	C	GO:0005774|vacuolar membrane(IDA)	other cytoplasmic components	C	GO:0005886|plasma membrane(IDA)	plasma membrane	C	GO:0005774|vacuolar membrane(IDA)	other intracellular components	C	GO:0048046|apoplast(IDA)	extracellular	C	GO:0005774|vacuolar membrane(IDA)	other membranes	P	GO:0009737|response to abscisic acid(IEP)	other biological processes	C	GO:0009570|chloroplast stroma(IDA)	plastid	C	GO:0005829|cytosol(IDA)	cytosol	C	GO:0009570|chloroplast stroma(IDA)	chloroplast	C	GO:0009570|chloroplast stroma(IDA)	other intracellular components
AT1G78910	C	GO:0005739|mitochondrion(ISM)	mitochondria	F	GO:0009982|pseudouridine synthase activity(ISS)	other enzyme activity	F	GO:0009982|pseudouridine synthase activity(TAS)	other enzyme activity
AT4G18460	P	GO:0019478|D-amino acid catabolic process(ISS)	other cellular processes	C	GO:0005737|cytoplasm(ISM)	other cytoplasmic components	C	GO:0005737|cytoplasm(ISS)	other cytoplasmic components	P	GO:0019478|D-amino acid catabolic process(ISS)	other metabolic processes	F	GO:0016788|hydrolase activity, acting on ester bonds(ISS)	hydrolase activity
AT2G43460	P	GO:0006412|translation(ISS)	other metabolic processes	P	GO:0006412|translation(ISS)	protein metabolism	C	GO:0005840|ribosome(ISS)	ribosome	C	GO:0022626|cytosolic ribosome(IDA)	ribosome	C	GO:0022625|cytosolic large ribosomal subunit(IDA)	other cytoplasmic components	C	GO:0022626|cytosolic ribosome(IDA)	other cytoplasmic components	C	GO:0022625|cytosolic large ribosomal subunit(IDA)	cytosol	C	GO:0022625|cytosolic large ribosomal subunit(IDA)	other intracellular components	C	GO:0022626|cytosolic ribosome(IDA)	ribosome	C	GO:0022626|cytosolic ribosome(IDA)	other intracellular components	P	GO:0006412|translation(ISS)	other cellular processes	C	GO:0022626|cytosolic ribosome(IDA)	cytosol	C	GO:0022626|cytosolic ribosome(IDA)	cytosol	C	GO:0022626|cytosolic ribosome(IDA)	other intracellular components	C	GO:0005737|cytoplasm(ISM)	other cytoplasmic components	F	GO:0003735|structural constituent of ribosome(ISS)	structural molecule activity	P
AT3G59540	C	GO:0022625|cytosolic large ribosomal subunit(IDA)	ribosome	C	GO:0022625|cytosolic large ribosomal subunit(IDA)	other intracellular components	C	GO:0005840|ribosome(ISS)	ribosome	P	GO:0001510|RNA methylation(RCA)	other metabolic processes	P	GO:0006412|translation(ISS)	protein metabolism	P	GO:0006412|translation(ISS)	other cellular processes	F	GO:0003735|structural constituent of ribosome(ISS)	structural molecule activity	C	GO:0022625|cytosolic large ribosomal subunit(IDA)	other cytoplasmic components	P	GO:0006412|translation(ISS)	other metabolic processes	C	GO:0022625|cytosolic large ribosomal subunit(IDA)	cytosol	P	GO:0042254|ribosome biogenesis(ISS)	other biological processes	C	GO:0005737|cytoplasm(ISM)	other cytoplasmic components	P	GO:0001510|RNA methylation(RCA)	other cellular processes
AT4G30150	No annotation
AT1G62110	C	GO:0005739|mitochondrion(ISM)	mitochondria
AT2G07705	C	GO:0005575|cellular_component(ND)	unknown cellular components	F	GO:0003674|molecular_function(ND)	unknown molecular functions	P	GO:0008150|biological_process(ND)	unknown biological processes
AT2G43780	C	GO:0005737|cytoplasm(ISM)	other cytoplasmic components	C	GO:0005739|mitochondrion(IDA)	mitochondria	C	GO:0005737|cytoplasm(ISM)	other cytoplasmic components	P	GO:0008150|biological_process(ND)	unknown biological processes	C	GO:0005739|mitochondrion(IDA)	mitochondria	F	GO:0003674|molecular_function(ND)	unknown molecular functions
AT3G19440	P	GO:0019243|methylglyoxal catabolic process to D-lactate(RCA)	other cellular processes	F	GO:0009982|pseudouridine synthase activity(ISS)	other enzyme activity	C	GO:0005739|mitochondrion(IDA)	mitochondria	C	GO:0005739|mitochondrion(ISM)	mitochondria	F	GO:0009982|pseudouridine synthase activity(TAS)	other enzyme activity	P	GO:0019243|methylglyoxal catabolic process to D-lactate(RCA)	other metabolic processes
AT5G48470	F	GO:0003674|molecular_function(ND)	unknown molecular functions	C	GO:0009507|chloroplast(ISM)	chloroplast	P	GO:0008150|biological_process(ND)	unknown biological processes
AT3G16010	C	GO:0005739|mitochondrion(ISM)	mitochondria	P	GO:0008150|biological_process(ND)	unknown biological processes
AT1G76590	C	GO:0005739|mitochondrion(ISM)	mitochondria	P	GO:0010286|heat acclimation(RCA)	response to abiotic or biotic stimulus	P	GO:0010286|heat acclimation(RCA)	response to stress	P	GO:0008150|biological_process(ND)	unknown biological processes
AT5G09450	P	GO:0008150|biological_process(ND)	unknown biological processes	F	GO:0003674|molecular_function(ND)	unknown molecular functions	C	GO:0005739|mitochondrion(ISM)	mitochondria
AT4G32750	C	GO:0005737|cytoplasm(ISM)	other cytoplasmic components	F	GO:0003674|molecular_function(ND)	unknown molecular functions	P	GO:0008150|biological_process(ND)	unknown biological processes
AT3G46760	F	GO:0016301|kinase activity(ISS)	kinase activity	C	GO:0005886|plasma membrane(ISM)	plasma membrane
AT2G35736	F	GO:0003674|molecular_function(ND)	unknown molecular functions	P	GO:0008150|biological_process(ND)	unknown biological processes
AT1G30170	P	GO:0008150|biological_process(ND)	unknown biological processes	C	GO:0005739|mitochondrion(ISM)	mitochondria	F	GO:0003674|molecular_function(ND)	unknown molecular functions
AT4G14790	C	GO:0005739|mitochondrion(IDA)	mitochondria	C	GO:0005739|mitochondrion(IDA)	mitochondria	P	GO:0016070|RNA metabolic process(IDA)	other cellular processes	F	GO:0004004|ATP-dependent RNA helicase activity(IDA)	hydrolase activity	P	GO:0009561|megagametogenesis(IMP)	developmental processes	P	GO:0009555|pollen development(IMP)	developmental processes	C	GO:0005739|mitochondrion(ISM)	mitochondria	P	GO:0016070|RNA metabolic process(IDA)	other metabolic processes
AT1G79390	C	GO:0005739|mitochondrion(ISM)	mitochondria	P	GO:0008150|biological_process(ND)	unknown biological processes	F	GO:0003674|molecular_function(ND)	unknown molecular functions
AT5G26830	P	GO:0006435|threonyl-tRNA aminoacylation(ISS)	protein metabolism	C	GO:0005886|plasma membrane(IDA)	plasma membrane	P	GO:0010498|proteasomal protein catabolic process(RCA)	protein metabolism	P	GO:0010498|proteasomal protein catabolic process(RCA)	other metabolic processes	P	GO:0010498|proteasomal protein catabolic process(RCA)	other cellular processes	P	GO:0006435|threonyl-tRNA aminoacylation(ISS)	other metabolic processes	P	GO:0006094|gluconeogenesis(RCA)	other metabolic processes	F	GO:0004829|threonine-tRNA ligase activity(ISS)	other enzyme activity	C	GO:0005829|cytosol(IDA)	cytosol	P	GO:0007010|cytoskeleton organization(RCA)	cell organization and biogenesis	P	GO:0007010|cytoskeleton organization(RCA)	other cellular processes	C	GO:0005739|mitochondrion(ISM)	mitochondria	C	GO:0016020|membrane(IDA)	other membranes	C	GO:0005618|cell wall(IDA)	cell wall	P	GO:0006435|threonyl-tRNA aminoacylation(ISS)	other cellular processes	C	GO:0005739|mitochondrion(IDA)	mitochondria	C
AT2G30160	C	GO:0005743|mitochondrial inner membrane(ISS)	mitochondria	P	GO:0006839|mitochondrial transport(ISS)	transport	C	GO:0005743|mitochondrial inner membrane(ISS)	other intracellular components	C	GO:0005743|mitochondrial inner membrane(ISS)	other cytoplasmic components	C	GO:0005743|mitochondrial inner membrane(ISS)	other membranes	P	GO:0006810|transport(ISS)	transport
AT2G29500	P	GO:0006979|response to oxidative stress(IEP)	response to stress	P	GO:0009408|response to heat(IEP)	response to stress	P	GO:0006457|protein folding(RCA)	other cellular processes	P	GO:0006457|protein folding(RCA)	protein metabolism	P	GO:0034976|response to endoplasmic reticulum stress(RCA)	other cellular processes	P	GO:0010286|heat acclimation(RCA)	response to abiotic or biotic stimulus	C	GO:0005737|cytoplasm(ISM)	other cytoplasmic components	P	GO:0009408|response to heat(RCA)	response to abiotic or biotic stimulus	P	GO:0009644|response to high light intensity(RCA)	response to abiotic or biotic stimulus	P	GO:0010286|heat acclimation(RCA)	response to stress	F	GO:0003674|molecular_function(ND)	unknown molecular functions	P	GO:0034976|response to endoplasmic reticulum stress(RCA)	response to stress	P	GO:0009408|response to heat(RCA)	response to stress	P	GO:0042542|response to hydrogen peroxide(RCA)	response to stress	P	GO:0009644|response to high light intensity(IEP)	response to abiotic or biotic stimulus	P	GO:0009408|response to heat(ISS)	response to abiotic or biotic stimulus	C
AT5G24130	F	GO:0003674|molecular_function(ND)	unknown molecular functions	C	GO:0005739|mitochondrion(ISM)	mitochondria	P	GO:0008150|biological_process(ND)	unknown biological processes
AT4G09965	F	GO:0003674|molecular_function(ND)	unknown molecular functions	C	GO:0005739|mitochondrion(ISM)	mitochondria	P	GO:0008150|biological_process(ND)	unknown biological processes
AT4G00860	P	GO:0009853|photorespiration(RCA)	other cellular processes	C	GO:0005777|peroxisome(IDA)	other intracellular components	P	GO:0009853|photorespiration(RCA)	other metabolic processes	C	GO:0005739|mitochondrion(IDA)	mitochondria	C	GO:0009536|plastid(IDA)	plastid	C	GO:0005777|peroxisome(IDA)	other cytoplasmic components	F	GO:0003674|molecular_function(ND)	unknown molecular functions	P	GO:0009617|response to bacterium(IEP)	response to abiotic or biotic stimulus	P	GO:0010193|response to ozone(IEP)	response to stress	F	GO:0003674|molecular_function(ND)	unknown molecular functions	C	GO:0005777|peroxisome(IDA)	other cytoplasmic components	P	GO:0000302|response to reactive oxygen species(IEP)	response to stress	C	GO:0016020|membrane(IDA)	other membranes	C	GO:0005739|mitochondrion(IDA)	mitochondria	C	GO:0005777|peroxisome(IDA)	other intracellular components	C	GO:0005739|mitochondrion(IDA)	mitochondria
AT2G15960	C	GO:0005575|cellular_component(ND)	unknown cellular components	F	GO:0003674|molecular_function(ND)	unknown molecular functions	P	GO:0008150|biological_process(ND)	unknown biological processes
AT3G52040	P	GO:0008150|biological_process(ND)	unknown biological processes	F	GO:0003674|molecular_function(ND)	unknown molecular functions
AT5G13030	P	GO:0008150|biological_process(ND)	unknown biological processes	F	GO:0003674|molecular_function(ND)	unknown molecular functions	C	GO:0009570|chloroplast stroma(IDA)	other cytoplasmic components	C	GO:0009570|chloroplast stroma(IDA)	other intracellular components	C	GO:0005739|mitochondrion(ISM)	mitochondria	C	GO:0009570|chloroplast stroma(IDA)	chloroplast	C	GO:0009507|chloroplast(IDA)	chloroplast	C	GO:0009570|chloroplast stroma(IDA)	plastid
AT5G43940	F	GO:0051903|S-(hydroxymethyl)glutathione dehydrogenase activity(IDA)	other enzyme activity	P	GO:0009611|response to wounding(IEP)	response to stress	P	GO:0046292|formaldehyde metabolic process(IGI)	other cellular processes	C	GO:0005777|peroxisome(IDA)	other cytoplasmic components	P	GO:0019288|isopentenyl diphosphate biosynthetic process, methylerythritol 4-phosphate pathway(RCA)	other metabolic processes	F	GO:0080007|S-nitrosoglutathione reductase activity(IMP)	other enzyme activity	P	GO:0009684|indoleacetic acid biosynthetic process(RCA)	other metabolic processes	P	GO:0006569|tryptophan catabolic process(RCA)	other cellular processes	P	GO:0046292|formaldehyde metabolic process(IDA)	other cellular processes	F	GO:0051903|S-(hydroxymethyl)glutathione dehydrogenase activity(IDA)	other enzyme activity	C	GO:0005777|peroxisome(IDA)	other intracellular components	P	GO:0046292|formaldehyde metabolic process(IGI)	other metabolic processes	C	GO:0005737|cytoplasm(ISM)	other cytoplasmic components	P	GO:0019288|isopentenyl diphosphate biosynthetic process, methylerythritol 4-phosphate pathway(RCA)	other cellular processes	P	GO:0010286|heat acclimation(IMP)	response to abiotic or biotic stimulus	C	GO:0005777|peroxisome(IDA)	other intracellular components	C
AT1G74750	C	GO:0009507|chloroplast(ISM)	chloroplast
AT3G60770	P	GO:0006412|translation(ISS)	protein metabolism	C	GO:0022627|cytosolic small ribosomal subunit(ISS)	other cytoplasmic components	C	GO:0022627|cytosolic small ribosomal subunit(ISS)	cytosol	C	GO:0022626|cytosolic ribosome(IDA)	other cytoplasmic components	C	GO:0022626|cytosolic ribosome(IDA)	ribosome	C	GO:0005730|nucleolus(IDA)	other intracellular components	F	GO:0003735|structural constituent of ribosome(ISS)	structural molecule activity	P	GO:0006412|translation(ISS)	other metabolic processes	C	GO:0022627|cytosolic small ribosomal subunit(ISS)	ribosome	C	GO:0005618|cell wall(IDA)	cell wall	C	GO:0022626|cytosolic ribosome(IDA)	cytosol	C	GO:0005730|nucleolus(IDA)	nucleus	P	GO:0001510|RNA methylation(RCA)	other metabolic processes	C	GO:0022627|cytosolic small ribosomal subunit(IDA)	other intracellular components	P	GO:0001510|RNA methylation(RCA)	other cellular processes	C	GO:0022626|cytosolic ribosome(IDA)	other cytoplasmic components	C
AT5G11960	P	GO:0008150|biological_process(ND)	unknown biological processes	C	GO:0009507|chloroplast(ISM)	chloroplast
AT1G28395	F	GO:0003674|molecular_function(ND)	unknown molecular functions	P	GO:0008150|biological_process(ND)	unknown biological processes	P	GO:0006164|purine nucleotide biosynthetic process(RCA)	other cellular processes	C	GO:0005739|mitochondrion(IDA)	mitochondria	P	GO:0006164|purine nucleotide biosynthetic process(RCA)	other metabolic processes
AT4G18520	P	GO:0008150|biological_process(ND)	unknown biological processes	C	GO:0005739|mitochondrion(ISM)	mitochondria
AT3G60950	P	GO:0008150|biological_process(ND)	unknown biological processes	C	GO:0005886|plasma membrane(ISM)	plasma membrane	C	GO:0005886|plasma membrane(IDA)	plasma membrane
AT5G09840	P	GO:0006606|protein import into nucleus(RCA)	transport	C	GO:0005739|mitochondrion(IDA)	mitochondria	C	GO:0009507|chloroplast(ISM)	chloroplast
AT1G48900	F	GO:0008312|7S RNA binding(ISS)	DNA or RNA binding	P	GO:0006617|SRP-dependent cotranslational protein targeting to membrane, signal sequence recognition(ISS)	cell organization and biogenesis	C	GO:0005829|cytosol(IDA)	cytosol	C	GO:0005786|signal recognition particle, endoplasmic reticulum targeting(ISS)	other intracellular components	P	GO:0006617|SRP-dependent cotranslational protein targeting to membrane, signal sequence recognition(ISS)	transport	F	GO:0005525|GTP binding(ISS)	nucleotide binding	P	GO:0051607|defense response to virus(RCA)	response to stress	P	GO:0035196|production of miRNAs involved in gene silencing by miRNA(RCA)	other cellular processes	C	GO:0005829|cytosol(IDA)	cytosol	F	GO:0003729|mRNA binding(ISS)	DNA or RNA binding	P	GO:0010267|production of ta-siRNAs involved in RNA interference(RCA)	other cellular processes	P	GO:0051607|defense response to virus(RCA)	response to abiotic or biotic stimulus	C	GO:0005786|signal recognition particle, endoplasmic reticulum targeting(ISS)	other cytoplasmic components	F	GO:0005525|GTP binding(ISS)	other binding	P	GO:0006617|SRP-dependent cotranslational protein targeting to membrane, signal sequence recognition(ISS)	other cellular processes	P	GO:0035196|production of miRNAs involved in gene silencing by miRNA(RCA)	other metabolic processes	C
AT4G00620	C	GO:0009507|chloroplast(IDA)	chloroplast	F	GO:0003824|catalytic activity(ISS)	other enzyme activity	P	GO:0009396|folic acid-containing compound biosynthetic process(ISS)	other metabolic processes	P	GO:0009396|folic acid-containing compound biosynthetic process(ISS)	other cellular processes	C	GO:0009507|chloroplast(ISM)	chloroplast
AT5G55610	P	GO:0009060|aerobic respiration(RCA)	other cellular processes	C	GO:0016020|membrane(IDA)	other membranes	C	GO:0009507|chloroplast(IDA)	chloroplast	P	GO:0006096|glycolytic process(RCA)	other metabolic processes	P	GO:0006096|glycolytic process(RCA)	other cellular processes	P	GO:0046686|response to cadmium ion(RCA)	other biological processes	C	GO:0009536|plastid(IDA)	plastid	P	GO:0009060|aerobic respiration(RCA)	other metabolic processes	C	GO:0009507|chloroplast(ISM)	chloroplast	P	GO:0006096|glycolytic process(RCA)	electron transport or energy pathways	C	GO:0005739|mitochondrion(IDA)	mitochondria	C	GO:0005739|mitochondrion(IDA)	mitochondria	P	GO:0006857|oligopeptide transport(RCA)	transport	P	GO:0009060|aerobic respiration(RCA)	electron transport or energy pathways	C	GO:0016020|membrane(IDA)	other membranes
AT1G06730	C	GO:0005737|cytoplasm(IDA)	other cytoplasmic components	C	GO:0005634|nucleus(IDA)	nucleus	F	GO:0016301|kinase activity(ISS)	kinase activity
AT1G06010	F	GO:0003674|molecular_function(ND)	unknown molecular functions	C	GO:0005575|cellular_component(ND)	unknown cellular components	P	GO:0008150|biological_process(ND)	unknown biological processes
AT3G05240	C	GO:0005739|mitochondrion(ISM)	mitochondria	P	GO:0080156|mitochondrial mRNA modification(IMP)	other metabolic processes	P	GO:0080156|mitochondrial mRNA modification(IMP)	other cellular processes
AT4G36170	F	GO:0003674|molecular_function(ND)	unknown molecular functions	C	GO:0005739|mitochondrion(ISM)	mitochondria	P	GO:0008150|biological_process(ND)	unknown biological processes
AT4G31790	P	GO:0017183|peptidyl-diphthamide biosynthetic process from peptidyl-histidine(ISS)	other cellular processes	P	GO:0009220|pyrimidine ribonucleotide biosynthetic process(RCA)	other cellular processes	F	GO:0004164|diphthine synthase activity(ISS)	transferase activity	F	GO:0008168|methyltransferase activity(ISS)	transferase activity	P	GO:0017183|peptidyl-diphthamide biosynthetic process from peptidyl-histidine(ISS)	other metabolic processes	C	GO:0005737|cytoplasm(ISM)	other cytoplasmic components	P	GO:0017183|peptidyl-diphthamide biosynthetic process from peptidyl-histidine(ISS)	protein metabolism	C	GO:0005737|cytoplasm(ISM)	other cytoplasmic components	P	GO:0008152|metabolic process(ISS)	other metabolic processes	P	GO:0009220|pyrimidine ribonucleotide biosynthetic process(RCA)	other metabolic processes
AT1G19240	F	GO:0003674|molecular_function(ND)	unknown molecular functions	C	GO:0005575|cellular_component(ND)	unknown cellular components	P	GO:0008150|biological_process(ND)	unknown biological processes
AT5G49015	C	GO:0005575|cellular_component(ND)	unknown cellular components	F	GO:0003674|molecular_function(ND)	unknown molecular functions	F	GO:0003674|molecular_function(ND)	unknown molecular functions	P	GO:0008150|biological_process(ND)	unknown biological processes
AT1G52600	P	GO:0034976|response to endoplasmic reticulum stress(RCA)	other cellular processes	C	GO:0005886|plasma membrane(IDA)	plasma membrane	C	GO:0005783|endoplasmic reticulum(IDA)	ER	C	GO:0016020|membrane(ISS)	other membranes	P	GO:0009627|systemic acquired resistance(RCA)	response to stress	F	GO:0008233|peptidase activity(ISS)	hydrolase activity	C	GO:0009507|chloroplast(ISM)	chloroplast	P	GO:0009627|systemic acquired resistance(RCA)	response to abiotic or biotic stimulus	P	GO:0006508|proteolysis(ISS)	protein metabolism	C	GO:0005783|endoplasmic reticulum(IDA)	ER	P	GO:0034976|response to endoplasmic reticulum stress(RCA)	response to stress
AT4G26240	F	GO:0003674|molecular_function(ND)	unknown molecular functions	P	GO:0008150|biological_process(ND)	unknown biological processes	C	GO:0005634|nucleus(ISM)	nucleus
AT4G32208	C	GO:0005739|mitochondrion(ISM)	mitochondria	F	GO:0003674|molecular_function(ND)	unknown molecular functions	P	GO:0008150|biological_process(ND)	unknown biological processes
AT5G41340	P	GO:0006301|postreplication repair(RCA)	DNA or RNA metabolism	C	GO:0005634|nucleus(ISM)	nucleus	F	GO:0004842|ubiquitin-protein transferase activity(ISS)	transferase activity	P	GO:0006301|postreplication repair(RCA)	other metabolic processes	F	GO:0004842|ubiquitin-protein transferase activity(IDA)	transferase activity	P	GO:0006511|ubiquitin-dependent protein catabolic process(IDA)	other cellular processes	P	GO:0006511|ubiquitin-dependent protein catabolic process(IDA)	other metabolic processes	P	GO:0006511|ubiquitin-dependent protein catabolic process(IDA)	protein metabolism	F	GO:0004842|ubiquitin-protein transferase activity(ISS)	transferase activity	P	GO:0006511|ubiquitin-dependent protein catabolic process(TAS)	other metabolic processes	P	GO:0006301|postreplication repair(RCA)	other cellular processes	P	GO:0006511|ubiquitin-dependent protein catabolic process(TAS)	other cellular processes	P	GO:0006301|postreplication repair(RCA)	response to stress	P	GO:0006511|ubiquitin-dependent protein catabolic process(TAS)	protein metabolism
AT2G41600	C	GO:0005739|mitochondrion(ISM)	mitochondria	C	GO:0005739|mitochondrion(ISM)	mitochondria	F	GO:0003674|molecular_function(ND)	unknown molecular functions	C	GO:0005739|mitochondrion(ISM)	mitochondria	P	GO:0008150|biological_process(ND)	unknown biological processes	C	GO:0005739|mitochondrion(ISM)	mitochondria	C	GO:0005739|mitochondrion(ISM)	mitochondria
AT3G01740	P	GO:0009086|methionine biosynthetic process(RCA)	other cellular processes	C	GO:0005739|mitochondrion(ISM)	mitochondria	P	GO:0008150|biological_process(ND)	unknown biological processes	P	GO:0009086|methionine biosynthetic process(RCA)	other metabolic processes	F	GO:0003674|molecular_function(ND)	unknown molecular functions	P	GO:0000394|RNA splicing, via endonucleolytic cleavage and ligation(RCA)	other cellular processes	P	GO:0000394|RNA splicing, via endonucleolytic cleavage and ligation(RCA)	other metabolic processes
AT2G44065	P	GO:0006511|ubiquitin-dependent protein catabolic process(RCA)	other cellular processes	C	GO:0015934|large ribosomal subunit(ISS)	other cytoplasmic components	C	GO:0015934|large ribosomal subunit(ISS)	ribosome	P	GO:0006354|DNA-templated transcription, elongation(RCA)	other cellular processes	P	GO:0006412|translation(ISS)	other cellular processes	C	GO:0009507|chloroplast(ISM)	chloroplast	C	GO:0015934|large ribosomal subunit(ISS)	other intracellular components	F	GO:0003735|structural constituent of ribosome(ISS)	structural molecule activity	P	GO:0006412|translation(ISS)	other metabolic processes	P	GO:0006511|ubiquitin-dependent protein catabolic process(RCA)	other metabolic processes	P	GO:0006412|translation(ISS)	protein metabolism	P	GO:0006511|ubiquitin-dependent protein catabolic process(RCA)	protein metabolism	P	GO:0006354|DNA-templated transcription, elongation(RCA)	other metabolic processes	P	GO:0080129|proteasome core complex assembly(RCA)	cell organization and biogenesis	C	GO:0009507|chloroplast(ISM)	chloroplast	P	GO:0009853|photorespiration(RCA)	other metabolic processes	P
AT2G40955	C	GO:0005739|mitochondrion(ISM)	mitochondria	F	GO:0003674|molecular_function(ND)	unknown molecular functions	P	GO:0008150|biological_process(ND)	unknown biological processes
AT1G76060	C	GO:0005739|mitochondrion(ISM)	mitochondria	F	GO:0003824|catalytic activity(ISS)	other enzyme activity
AT2G37250	C	GO:0005737|cytoplasm(IDA)	other cytoplasmic components	P	GO:0048364|root development(IMP)	developmental processes	C	GO:0005739|mitochondrion(ISM)	mitochondria	P	GO:0048367|shoot system development(IMP)	developmental processes	C	GO:0009570|chloroplast stroma(IDA)	chloroplast	C	GO:0009570|chloroplast stroma(IDA)	other cytoplasmic components	C	GO:0009507|chloroplast(IDA)	chloroplast	F	GO:0004017|adenylate kinase activity(IDA)	transferase activity	P	GO:0008652|cellular amino acid biosynthetic process(IMP)	other metabolic processes	C	GO:0005634|nucleus(IDA)	nucleus	F	GO:0019201|nucleotide kinase activity(ISS)	kinase activity	P	GO:0006354|DNA-templated transcription, elongation(RCA)	other metabolic processes	P	GO:0006354|DNA-templated transcription, elongation(RCA)	transcription,DNA-dependent	F	GO:0004017|adenylate kinase activity(IDA)	kinase activity	C	GO:0009570|chloroplast stroma(IDA)	plastid	P	GO:0006354|DNA-templated transcription, elongation(RCA)	other cellular processes	P
AT1G23465	C	GO:0009507|chloroplast(ISM)	chloroplast
AT1G67660	C	GO:0009507|chloroplast(ISM)	chloroplast	C	GO:0005634|nucleus(ISM)	nucleus	C	GO:0009507|chloroplast(ISM)	chloroplast
AT4G15096	P	GO:0008150|biological_process(ND)	unknown biological processes	C	GO:0005739|mitochondrion(ISM)	mitochondria	F	GO:0003674|molecular_function(ND)	unknown molecular functions
AT1G04630	C	GO:0005747|mitochondrial respiratory chain complex I(IDA)	other membranes	P	GO:0009853|photorespiration(TAS)	other cellular processes	F	GO:0003674|molecular_function(ND)	unknown molecular functions	P	GO:0009853|photorespiration(TAS)	other metabolic processes	C	GO:0031966|mitochondrial membrane(IDA)	mitochondria	C	GO:0045271|respiratory chain complex I(IDA)	other membranes	C	GO:0005747|mitochondrial respiratory chain complex I(IDA)	mitochondria	C	GO:0031966|mitochondrial membrane(IDA)	other cytoplasmic components	C	GO:0031966|mitochondrial membrane(IDA)	other membranes	C	GO:0031966|mitochondrial membrane(IDA)	other intracellular components	P	GO:0009793|embryo development ending in seed dormancy(IMP)	developmental processes	C	GO:0005747|mitochondrial respiratory chain complex I(IDA)	other cytoplasmic components	C	GO:0005739|mitochondrion(IDA)	mitochondria	C	GO:0005747|mitochondrial respiratory chain complex I(IDA)	other intracellular components	C	GO:0009507|chloroplast(ISM)	chloroplast	C	GO:0005739|mitochondrion(IDA)	mitochondria
AT2G20530	C	GO:0005774|vacuolar membrane(IDA)	other intracellular components	C	GO:0005747|mitochondrial respiratory chain complex I(IDA)	other membranes	C	GO:0005747|mitochondrial respiratory chain complex I(IDA)	mitochondria	C	GO:0005739|mitochondrion(IDA)	mitochondria	C	GO:0005739|mitochondrion(IDA)	mitochondria	C	GO:0005774|vacuolar membrane(IDA)	other cytoplasmic components	C	GO:0005747|mitochondrial respiratory chain complex I(IDA)	other cytoplasmic components	C	GO:0005747|mitochondrial respiratory chain complex I(IDA)	other intracellular components	P	GO:0008150|biological_process(ND)	unknown biological processes	C	GO:0005747|mitochondrial respiratory chain complex I(IDA)	other membranes	C	GO:0005774|vacuolar membrane(IDA)	other intracellular components	C	GO:0005774|vacuolar membrane(IDA)	other cytoplasmic components	C	GO:0005774|vacuolar membrane(IDA)	other membranes	C	GO:0005739|mitochondrion(IDA)	mitochondria	C	GO:0016020|membrane(IDA)	other membranes	C	GO:0016020|membrane(IDA)	other membranes	C
AT1G20520	C	GO:0005575|cellular_component(ND)	unknown cellular components	P	GO:0008150|biological_process(ND)	unknown biological processes	F	GO:0003674|molecular_function(ND)	unknown molecular functions
AT2G03880	P	GO:0009451|RNA modification(IMP)	other metabolic processes	C	GO:0005739|mitochondrion(IDA)	mitochondria	C	GO:0005739|mitochondrion(ISM)	mitochondria	P	GO:0009451|RNA modification(IMP)	other cellular processes
AT3G25660	C	GO:0009507|chloroplast(IDA)	chloroplast	C	GO:0009570|chloroplast stroma(IDA)	other intracellular components	C	GO:0009570|chloroplast stroma(IDA)	other intracellular components	C	GO:0009570|chloroplast stroma(IDA)	other cytoplasmic components	C	GO:0009570|chloroplast stroma(IDA)	plastid	P	GO:0006655|phosphatidylglycerol biosynthetic process(RCA)	other metabolic processes	C	GO:0009570|chloroplast stroma(IDA)	chloroplast	C	GO:0009570|chloroplast stroma(IDA)	plastid	C	GO:0009570|chloroplast stroma(IDA)	chloroplast	C	GO:0009507|chloroplast(ISM)	chloroplast	F	GO:0050567|glutaminyl-tRNA synthase (glutamine-hydrolyzing) activity(ISS)	other enzyme activity	P	GO:0006655|phosphatidylglycerol biosynthetic process(RCA)	other cellular processes	C	GO:0009570|chloroplast stroma(IDA)	other cytoplasmic components
AT3G66654	C	GO:0005768|endosome(IDA)	other cytoplasmic components	C	GO:0005794|Golgi apparatus(IDA)	Golgi apparatus	C	GO:0005886|plasma membrane(IDA)	plasma membrane	F	GO:0003755|peptidyl-prolyl cis-trans isomerase activity(ISS)	other enzyme activity	C	GO:0005802|trans-Golgi network(IDA)	other cytoplasmic components	C	GO:0005802|trans-Golgi network(IDA)	Golgi apparatus	C	GO:0005794|Golgi apparatus(IDA)	Golgi apparatus	C	GO:0005768|endosome(IDA)	other intracellular components	C	GO:0005802|trans-Golgi network(IDA)	other intracellular components	C	GO:0005886|plasma membrane(IDA)	plasma membrane	P	GO:0006457|protein folding(ISS)	other metabolic processes	C	GO:0005794|Golgi apparatus(IDA)	Golgi apparatus	P	GO:0006457|protein folding(ISS)	protein metabolism	C	GO:0005794|Golgi apparatus(IDA)	Golgi apparatus	C	GO:0005794|Golgi apparatus(IDA)	Golgi apparatus	C	GO:0005886|plasma membrane(IDA)	plasma membrane	P
AT5G03800	C	GO:0009507|chloroplast(ISM)	chloroplast	C	GO:0016020|membrane(ISS)	other membranes	F	GO:0003824|catalytic activity(ISS)	other enzyme activity	P	GO:0009793|embryo development ending in seed dormancy(IMP)	developmental processes	P	GO:0009793|embryo development ending in seed dormancy(NAS)	developmental processes
AT2G33220	C	GO:0045271|respiratory chain complex I(IDA)	other membranes	C	GO:0031966|mitochondrial membrane(IDA)	other cytoplasmic components	C	GO:0005739|mitochondrion(IDA)	mitochondria	C	GO:0005747|mitochondrial respiratory chain complex I(IDA)	other membranes	C	GO:0031966|mitochondrial membrane(IDA)	other membranes	C	GO:0005739|mitochondrion(IDA)	mitochondria	P	GO:0009853|photorespiration(RCA)	other metabolic processes	C	GO:0005747|mitochondrial respiratory chain complex I(IDA)	other intracellular components	C	GO:0031966|mitochondrial membrane(IDA)	other intracellular components	C	GO:0031966|mitochondrial membrane(IDA)	mitochondria	C	GO:0005747|mitochondrial respiratory chain complex I(IDA)	other membranes	C	GO:0005747|mitochondrial respiratory chain complex I(IDA)	other intracellular components	C	GO:0005747|mitochondrial respiratory chain complex I(IDA)	mitochondria	C	GO:0005739|mitochondrion(IDA)	mitochondria	P	GO:0009853|photorespiration(TAS)	other metabolic processes	C	GO:0005747|mitochondrial respiratory chain complex I(IDA)	other cytoplasmic components	C
AT1G17235	F	GO:0003674|molecular_function(ND)	unknown molecular functions	C	GO:0005739|mitochondrion(ISM)	mitochondria	P	GO:0042127|regulation of cell proliferation(ISS)	other cellular processes
AT2G30410	C	GO:0005737|cytoplasm(ISM)	other cytoplasmic components	C	GO:0005737|cytoplasm(ISM)	other cytoplasmic components	P	GO:0007021|tubulin complex assembly(ISS)	cell organization and biogenesis	C	GO:0005829|cytosol(IDA)	cytosol	P	GO:0007021|tubulin complex assembly(IGI)	cell organization and biogenesis
AT3G44430	P	GO:0008150|biological_process(ND)	unknown biological processes	C	GO:0005739|mitochondrion(ISM)	mitochondria	F	GO:0003674|molecular_function(ND)	unknown molecular functions
AT5G57590	P	GO:0006275|regulation of DNA replication(RCA)	other metabolic processes	P	GO:0006306|DNA methylation(RCA)	other cellular processes	F	GO:0004015|adenosylmethionine-8-amino-7-oxononanoate transaminase activity(IDA)	transferase activity	P	GO:0009102|biotin biosynthetic process(IGI)	other cellular processes	P	GO:0009102|biotin biosynthetic process(IDA)	other cellular processes	P	GO:0006275|regulation of DNA replication(RCA)	DNA or RNA metabolism	P	GO:0006270|DNA replication initiation(RCA)	other metabolic processes	P	GO:0006270|DNA replication initiation(RCA)	other cellular processes	P	GO:0006275|regulation of DNA replication(RCA)	other cellular processes	P	GO:0009102|biotin biosynthetic process(IDA)	other metabolic processes	C	GO:0005739|mitochondrion(IDA)	mitochondria	P	GO:0006260|DNA replication(RCA)	DNA or RNA metabolism	P	GO:0006260|DNA replication(RCA)	other cellular processes	P	GO:0009102|biotin biosynthetic process(IGI)	other metabolic processes	P	GO:0051567|histone H3-K9 methylation(RCA)	other cellular processes	C	GO:0005739|mitochondrion(IDA)	mitochondria	P
AT1G32710	F	GO:0004129|cytochrome-c oxidase activity(ISS)	transporter activity	F	GO:0004129|cytochrome-c oxidase activity(ISS)	other enzyme activity	C	GO:0005739|mitochondrion(ISS)	mitochondria
AT3G52930	C	GO:0005740|mitochondrial envelope(IDA)	other cytoplasmic components	P	GO:0009853|photorespiration(RCA)	other metabolic processes	P	GO:0006098|pentose-phosphate shunt(TAS)	other cellular processes	P	GO:0009266|response to temperature stimulus(RCA)	response to abiotic or biotic stimulus	P	GO:0009744|response to sucrose(RCA)	other biological processes	P	GO:0006096|glycolytic process(RCA)	other metabolic processes	C	GO:0005739|mitochondrion(IDA)	mitochondria	P	GO:0006096|glycolytic process(RCA)	other cellular processes	C	GO:0005730|nucleolus(IDA)	nucleus	C	GO:0048046|apoplast(IDA)	extracellular	C	GO:0005740|mitochondrial envelope(IDA)	mitochondria	C	GO:0005730|nucleolus(IDA)	other intracellular components	C	GO:0009507|chloroplast(IDA)	chloroplast	P	GO:0009749|response to glucose(RCA)	other biological processes	P	GO:0009651|response to salt stress(RCA)	response to stress	P	GO:0051788|response to misfolded protein(RCA)	response to stress	P
AT3G16240	F	GO:0015250|water channel activity(ISS)	transporter activity	C	GO:0016020|membrane(ISS)	other membranes	C	GO:0005773|vacuole(IDA)	other cytoplasmic components	C	GO:0000326|protein storage vacuole(IDA)	other cytoplasmic components	C	GO:0042807|central vacuole(IDA)	other cytoplasmic components	P	GO:0030003|cellular cation homeostasis(RCA)	other cellular processes	C	GO:0005773|vacuole(IDA)	other intracellular components	P	GO:0006810|transport(ISS)	transport	P	GO:0007030|Golgi organization(RCA)	cell organization and biogenesis	P	GO:0009651|response to salt stress(RCA)	response to stress	C	GO:0009705|plant-type vacuole membrane(IDA)	other intracellular components	C	GO:0009507|chloroplast(IDA)	chloroplast	P	GO:0006816|calcium ion transport(RCA)	transport	C	GO:0009941|chloroplast envelope(IDA)	chloroplast	C	GO:0009941|chloroplast envelope(IDA)	plastid	C	GO:0042807|central vacuole(IDA)	other intracellular components	P
AT5G13610	C	GO:0005739|mitochondrion(IDA)	mitochondria	C	GO:0005737|cytoplasm(ISM)	other cytoplasmic components	F	GO:0003674|molecular_function(ND)	unknown molecular functions	P	GO:0008150|biological_process(ND)	unknown biological processes
AT3G05790	P	GO:0034599|cellular response to oxidative stress(IBA)	response to stress	F	GO:0004252|serine-type endopeptidase activity(IBA)	hydrolase activity	C	GO:0005739|mitochondrion(IDA)	mitochondria	P	GO:0070407|oxidation-dependent protein catabolic process(IBA)	other metabolic processes	C	GO:0042645|mitochondrial nucleoid(IBA)	other cytoplasmic components	F	GO:0070361|mitochondrial light strand promoter anti-sense binding(IBA)	nucleic acid binding	P	GO:0001666|response to hypoxia(IBA)	response to abiotic or biotic stimulus	P	GO:0051260|protein homooligomerization(IBA)	cell organization and biogenesis	P	GO:0070407|oxidation-dependent protein catabolic process(IBA)	protein metabolism	P	GO:0006515|misfolded or incompletely synthesized protein catabolic process(IBA)	other cellular processes	F	GO:0005524|ATP binding(ISS)	nucleotide binding	P	GO:0001666|response to hypoxia(IBA)	response to stress	P	GO:0034599|cellular response to oxidative stress(IBA)	other cellular processes	P	GO:0006515|misfolded or incompletely synthesized protein catabolic process(IBA)	protein metabolism	P	GO:0006515|misfolded or incompletely synthesized protein catabolic process(IBA)	other metabolic processes	C	GO:0005739|mitochondrion(ISM)	mitochondria	F
AT2G36530	P	GO:0046686|response to cadmium ion(RCA)	other biological processes	C	GO:0048046|apoplast(IDA)	extracellular	F	GO:0003677|DNA binding(IDA)	DNA or RNA binding	C	GO:0005886|plasma membrane(IDA)	plasma membrane	P	GO:0006096|glycolytic process(RCA)	electron transport or energy pathways	F	GO:0004634|phosphopyruvate hydratase activity(ISS)	other enzyme activity	P	GO:0006096|glycolytic process(RCA)	other cellular processes	F	GO:0005507|copper ion binding(IDA)	other binding	P	GO:0006094|gluconeogenesis(RCA)	other metabolic processes	F	GO:0004634|phosphopyruvate hydratase activity(ISS)	other enzyme activity	P	GO:0009853|photorespiration(RCA)	other cellular processes	C	GO:0005737|cytoplasm(IDA)	other cytoplasmic components	C	GO:0005740|mitochondrial envelope(IDA)	mitochondria	P	GO:0009737|response to abscisic acid(IEP)	other biological processes	C	GO:0005886|plasma membrane(IDA)	plasma membrane	F	GO:0004634|phosphopyruvate hydratase activity(IDA)	other enzyme activity	C
AT3G62810	F	GO:0003824|catalytic activity(ISS)	other enzyme activity
AT1G62590	C	GO:0005739|mitochondrion(ISM)	mitochondria	F	GO:0004016|adenylate cyclase activity(IDA)	other enzyme activity
AT1G29960	C	GO:0016020|membrane(ISS)	other membranes	P	GO:0006508|proteolysis(ISS)	protein metabolism	P	GO:0048445|carpel morphogenesis(RCA)	developmental processes	C	GO:0005886|plasma membrane(ISM)	plasma membrane	F	GO:0008233|peptidase activity(ISS)	hydrolase activity
AT5G39740	P	GO:0009965|leaf morphogenesis(IMP)	developmental processes	P	GO:0009651|response to salt stress(RCA)	response to abiotic or biotic stimulus	C	GO:0005737|cytoplasm(ISM)	other cytoplasmic components	P	GO:0046686|response to cadmium ion(RCA)	other biological processes	C	GO:0022626|cytosolic ribosome(IDA)	ribosome	P	GO:0006096|glycolytic process(RCA)	electron transport or energy pathways	P	GO:0001510|RNA methylation(RCA)	other metabolic processes	C	GO:0022626|cytosolic ribosome(IDA)	cytosol	P	GO:0008283|cell proliferation(IMP)	other biological processes	C	GO:0022625|cytosolic large ribosomal subunit(IDA)	cytosol	C	GO:0005730|nucleolus(IDA)	nucleus	C	GO:0022626|cytosolic ribosome(IDA)	other intracellular components	C	GO:0022626|cytosolic ribosome(IDA)	other cytoplasmic components	C	GO:0022626|cytosolic ribosome(IDA)	other cytoplasmic components	F	GO:0003735|structural constituent of ribosome(ISS)	structural molecule activity	P	GO:0042254|ribosome biogenesis(ISS)	other biological processes	C
AT2G31240	P	GO:0008150|biological_process(ND)	unknown biological processes	P	GO:0009408|response to heat(RCA)	response to stress	P	GO:0034976|response to endoplasmic reticulum stress(RCA)	response to stress	P	GO:0009644|response to high light intensity(RCA)	response to abiotic or biotic stimulus	P	GO:0042542|response to hydrogen peroxide(RCA)	response to stress	P	GO:0006457|protein folding(RCA)	protein metabolism	P	GO:0009220|pyrimidine ribonucleotide biosynthetic process(RCA)	other cellular processes	P	GO:0009220|pyrimidine ribonucleotide biosynthetic process(RCA)	other metabolic processes	P	GO:0006457|protein folding(RCA)	other cellular processes	P	GO:0034976|response to endoplasmic reticulum stress(RCA)	other cellular processes	P	GO:0009408|response to heat(RCA)	response to abiotic or biotic stimulus	P	GO:0006457|protein folding(RCA)	other metabolic processes	C	GO:0009507|chloroplast(ISM)	chloroplast
AT5G02450	C	GO:0009506|plasmodesma(IDA)	other cellular components	P	GO:0006412|translation(ISS)	protein metabolism	C	GO:0022625|cytosolic large ribosomal subunit(IDA)	other cytoplasmic components	C	GO:0005774|vacuolar membrane(IDA)	other cytoplasmic components	P	GO:0006412|translation(ISS)	other cellular processes	C	GO:0022625|cytosolic large ribosomal subunit(IDA)	ribosome	C	GO:0005840|ribosome(ISS)	ribosome	F	GO:0003735|structural constituent of ribosome(ISS)	structural molecule activity	C	GO:0005774|vacuolar membrane(IDA)	other membranes	P	GO:0006412|translation(ISS)	other metabolic processes	C	GO:0022625|cytosolic large ribosomal subunit(IDA)	other intracellular components	C	GO:0022625|cytosolic large ribosomal subunit(IDA)	cytosol	C	GO:0005737|cytoplasm(ISM)	other cytoplasmic components	C	GO:0005774|vacuolar membrane(IDA)	other intracellular components
AT1G07770	C	GO:0005774|vacuolar membrane(IDA)	other intracellular components	C	GO:0005774|vacuolar membrane(IDA)	other intracellular components	C	GO:0005774|vacuolar membrane(IDA)	other membranes	C	GO:0022626|cytosolic ribosome(ISS)	other cytoplasmic components	C	GO:0022626|cytosolic ribosome(IDA)	cytosol	C	GO:0022626|cytosolic ribosome(IDA)	cytosol	C	GO:0022626|cytosolic ribosome(IDA)	ribosome	C	GO:0022626|cytosolic ribosome(IDA)	other intracellular components	C	GO:0005829|cytosol(IDA)	cytosol	C	GO:0022626|cytosolic ribosome(ISS)	other intracellular components	C	GO:0022627|cytosolic small ribosomal subunit(ISS)	other intracellular components	C	GO:0005886|plasma membrane(IDA)	plasma membrane	C	GO:0022626|cytosolic ribosome(IDA)	ribosome	C	GO:0005774|vacuolar membrane(IDA)	other cytoplasmic components	P	GO:0006412|translation(ISS)	protein metabolism	C	GO:0022626|cytosolic ribosome(IDA)	other cytoplasmic components	P
AT5G59850	C	GO:0022627|cytosolic small ribosomal subunit(ISS)	other intracellular components	P	GO:0001510|RNA methylation(RCA)	other metabolic processes	C	GO:0022627|cytosolic small ribosomal subunit(ISS)	other cytoplasmic components	C	GO:0022627|cytosolic small ribosomal subunit(IDA)	ribosome	C	GO:0022627|cytosolic small ribosomal subunit(ISS)	cytosol	F	GO:0003735|structural constituent of ribosome(ISS)	structural molecule activity	P	GO:0009664|plant-type cell wall organization(RCA)	other cellular processes	C	GO:0022627|cytosolic small ribosomal subunit(ISS)	ribosome	C	GO:0022627|cytosolic small ribosomal subunit(IDA)	other intracellular components	P	GO:0009664|plant-type cell wall organization(RCA)	cell organization and biogenesis	C	GO:0016020|membrane(IDA)	other membranes	C	GO:0022627|cytosolic small ribosomal subunit(IDA)	other cytoplasmic components	C	GO:0009507|chloroplast(ISM)	chloroplast	P	GO:0006412|translation(ISS)	other cellular processes	P	GO:0042545|cell wall modification(RCA)	other cellular processes	C	GO:0022627|cytosolic small ribosomal subunit(IDA)	cytosol	P
AT2G20500	P	GO:0008150|biological_process(ND)	unknown biological processes	F	GO:0003674|molecular_function(ND)	unknown molecular functions	C	GO:0005739|mitochondrion(ISM)	mitochondria
AT1G05670	C	GO:0005739|mitochondrion(ISM)	mitochondria	C	GO:0005739|mitochondrion(ISM)	mitochondria	F	GO:0016757|transferase activity, transferring glycosyl groups(ISS)	transferase activity
AT3G60150	C	GO:0005739|mitochondrion(ISM)	mitochondria	F	GO:0003674|molecular_function(ND)	unknown molecular functions	P	GO:0008150|biological_process(ND)	unknown biological processes
AT3G29639	C	GO:0005739|mitochondrion(ISM)	mitochondria
AT5G61310	F	GO:0004129|cytochrome-c oxidase activity(ISS)	other enzyme activity	F	GO:0004129|cytochrome-c oxidase activity(ISS)	transporter activity	C	GO:0005739|mitochondrion(ISM)	mitochondria	C	GO:0005739|mitochondrion(ISM)	mitochondria	C	GO:0005739|mitochondrion(ISM)	mitochondria	C	GO:0005739|mitochondrion(ISM)	mitochondria
AT5G05113	C	GO:0005739|mitochondrion(ISM)	mitochondria
ATMG01060	F	GO:0003674|molecular_function(ND)	unknown molecular functions	C	GO:0005739|mitochondrion(ISM)	mitochondria	P	GO:0008150|biological_process(ND)	unknown biological processes
AT5G64320	F	GO:0003674|molecular_function(ND)	unknown molecular functions	P	GO:0008150|biological_process(ND)	unknown biological processes	C	GO:0005739|mitochondrion(ISM)	mitochondria
AT1G63290	P	GO:0005975|carbohydrate metabolic process(ISS)	other metabolic processes	C	GO:0005737|cytoplasm(ISM)	other cytoplasmic components	C	GO:0005829|cytosol(IDA)	cytosol	F	GO:0004750|ribulose-phosphate 3-epimerase activity(ISS)	other enzyme activity	C	GO:0005886|plasma membrane(IDA)	plasma membrane
AT3G46610	P	GO:0008150|biological_process(ND)	unknown biological processes	C	GO:0005739|mitochondrion(ISM)	mitochondria	F	GO:0003674|molecular_function(ND)	unknown molecular functions
AT3G18740	C	GO:0022625|cytosolic large ribosomal subunit(IDA)	cytosol	C	GO:0022626|cytosolic ribosome(IDA)	other intracellular components	C	GO:0005737|cytoplasm(ISM)	other cytoplasmic components	P	GO:0009620|response to fungus(IMP)	response to abiotic or biotic stimulus	C	GO:0005886|plasma membrane(IDA)	plasma membrane	P	GO:0006412|translation(ISS)	other metabolic processes	F	GO:0003735|structural constituent of ribosome(ISS)	structural molecule activity	C	GO:0022625|cytosolic large ribosomal subunit(IDA)	other cytoplasmic components	C	GO:0022625|cytosolic large ribosomal subunit(IDA)	other intracellular components	C	GO:0022626|cytosolic ribosome(IDA)	other cytoplasmic components	C	GO:0022626|cytosolic ribosome(IDA)	cytosol	C	GO:0009506|plasmodesma(IDA)	other cellular components	P	GO:0006412|translation(ISS)	protein metabolism	C	GO:0022625|cytosolic large ribosomal subunit(IDA)	ribosome	C	GO:0022626|cytosolic ribosome(IDA)	ribosome	P	GO:0006412|translation(ISS)	other cellular processes
AT1G04710	C	GO:0005777|peroxisome(IDA)	other intracellular components	C	GO:0005777|peroxisome(IDA)	other cytoplasmic components	C	GO:0005773|vacuole(IDA)	other cytoplasmic components	C	GO:0005777|peroxisome(IDA)	other cytoplasmic components	F	GO:0003988|acetyl-CoA C-acyltransferase activity(ISS)	transferase activity	C	GO:0005777|peroxisome(IDA)	other intracellular components	C	GO:0005773|vacuole(IDA)	other intracellular components	C	GO:0005739|mitochondrion(ISM)	mitochondria
AT2G24200	P	GO:0006972|hyperosmotic response(RCA)	response to stress	P	GO:0007030|Golgi organization(RCA)	other cellular processes	P	GO:0006096|glycolytic process(RCA)	other cellular processes	P	GO:0006972|hyperosmotic response(RCA)	response to abiotic or biotic stimulus	C	GO:0005773|vacuole(IDA)	other intracellular components	P	GO:0006508|proteolysis(ISS)	protein metabolism	P	GO:0009651|response to salt stress(RCA)	response to abiotic or biotic stimulus	P	GO:0046686|response to cadmium ion(IEP)	other biological processes	C	GO:0009570|chloroplast stroma(IDA)	other cytoplasmic components	P	GO:0006096|glycolytic process(RCA)	other metabolic processes	C	GO:0009507|chloroplast(ISM)	chloroplast	F	GO:0004177|aminopeptidase activity(ISS)	hydrolase activity	P	GO:0006094|gluconeogenesis(RCA)	other metabolic processes	P	GO:0006096|glycolytic process(RCA)	electron transport or energy pathways	P	GO:0007030|Golgi organization(RCA)	cell organization and biogenesis	P	GO:0006833|water transport(RCA)	transport	P
AT4G09775	C	GO:0005634|nucleus(ISM)	nucleus
ATMG01350	P	GO:0008150|biological_process(ND)	unknown biological processes	F	GO:0003674|molecular_function(ND)	unknown molecular functions	C	GO:0005739|mitochondrion(ISM)	mitochondria
AT1G05750	C	GO:0005739|mitochondrion(ISM)	mitochondria	P	GO:0009451|RNA modification(IMP)	other metabolic processes	C	GO:0009507|chloroplast(IDA)	chloroplast	P	GO:0009451|RNA modification(IMP)	other cellular processes
AT4G11410	F	GO:0016491|oxidoreductase activity(ISS)	other enzyme activity	C	GO:0009507|chloroplast(ISM)	chloroplast
AT2G07728	C	GO:0005739|mitochondrion(ISM)	mitochondria	F	GO:0003674|molecular_function(ND)	unknown molecular functions	P	GO:0008150|biological_process(ND)	unknown biological processes
AT2G45710	C	GO:0022627|cytosolic small ribosomal subunit(IDA)	cytosol	C	GO:0005886|plasma membrane(IDA)	plasma membrane	P	GO:0042254|ribosome biogenesis(ISS)	other biological processes	C	GO:0022626|cytosolic ribosome(IDA)	other intracellular components	F	GO:0003735|structural constituent of ribosome(ISS)	structural molecule activity	C	GO:0022626|cytosolic ribosome(IDA)	other cytoplasmic components	P	GO:0006412|translation(ISS)	other metabolic processes	C	GO:0022627|cytosolic small ribosomal subunit(IDA)	other intracellular components	C	GO:0022626|cytosolic ribosome(IDA)	cytosol	C	GO:0022626|cytosolic ribosome(IDA)	ribosome	C	GO:0005737|cytoplasm(ISM)	other cytoplasmic components	P	GO:0006412|translation(ISS)	other cellular processes	C	GO:0022626|cytosolic ribosome(IDA)	other cytoplasmic components	P	GO:0001510|RNA methylation(RCA)	other metabolic processes	P	GO:0001510|RNA methylation(RCA)	other cellular processes	C	GO:0022626|cytosolic ribosome(IDA)	other intracellular components	P
AT3G22200	P	GO:0009450|gamma-aminobutyric acid catabolic process(IMP)	other cellular processes	P	GO:0010183|pollen tube guidance(IMP)	other biological processes	P	GO:0006541|glutamine metabolic process(IMP)	other cellular processes	P	GO:0009651|response to salt stress(IMP)	response to stress	C	GO:0005737|cytoplasm(ISM)	other cytoplasmic components	C	GO:0005774|vacuolar membrane(IDA)	other intracellular components	P	GO:0007030|Golgi organization(RCA)	other cellular processes	F	GO:0034387|4-aminobutyrate:pyruvate transaminase activity(IDA)	transferase activity	P	GO:0048364|root development(IMP)	developmental processes	P	GO:0005985|sucrose metabolic process(IMP)	other metabolic processes	P	GO:0009860|pollen tube growth(NAS)	other cellular processes	P	GO:0006540|glutamate decarboxylation to succinate(IMP)	other cellular processes	P	GO:0010033|response to organic substance(IMP)	other biological processes	P	GO:0005985|sucrose metabolic process(IMP)	other cellular processes	P	GO:0043161|proteasome-mediated ubiquitin-dependent protein catabolic process(RCA)	other metabolic processes	C	GO:0005774|vacuolar membrane(IDA)	other membranes	P
AT2G16600	C	GO:0009506|plasmodesma(IDA)	other cellular components	C	GO:0009507|chloroplast(IDA)	chloroplast	P	GO:0006457|protein folding(ISS)	other metabolic processes	C	GO:0005794|Golgi apparatus(IDA)	Golgi apparatus	C	GO:0005829|cytosol(IDA)	cytosol	F	GO:0003755|peptidyl-prolyl cis-trans isomerase activity(ISS)	other enzyme activity	C	GO:0009507|chloroplast(IDA)	chloroplast	F	GO:0003755|peptidyl-prolyl cis-trans isomerase activity(ISS)	other enzyme activity	P	GO:0006457|protein folding(ISS)	other cellular processes	C	GO:0005794|Golgi apparatus(IDA)	Golgi apparatus	C	GO:0005829|cytosol(IDA)	cytosol	C	GO:0009506|plasmodesma(IDA)	other cellular components	C	GO:0005886|plasma membrane(IDA)	plasma membrane	C	GO:0005886|plasma membrane(IDA)	plasma membrane	C	GO:0005829|cytosol(ISS)	cytosol	P	GO:0007165|signal transduction(ISS)	signal transduction	C
AT2G11890	C	GO:0005634|nucleus(IDA)	nucleus	P	GO:0048364|root development(IMP)	developmental processes	F	GO:0050355|triphosphatase activity(IDA)	hydrolase activity
AT3G57160	C	GO:0005739|mitochondrion(ISM)	mitochondria	F	GO:0003674|molecular_function(ND)	unknown molecular functions	P	GO:0008150|biological_process(ND)	unknown biological processes
AT3G61110	P	GO:0006412|translation(ISS)	other cellular processes	P	GO:0001510|RNA methylation(RCA)	other metabolic processes	P	GO:0001510|RNA methylation(RCA)	other cellular processes	P	GO:0009664|plant-type cell wall organization(RCA)	cell organization and biogenesis	C	GO:0022627|cytosolic small ribosomal subunit(IDA)	cytosol	C	GO:0022627|cytosolic small ribosomal subunit(IDA)	other intracellular components	C	GO:0005840|ribosome(ISS)	ribosome	C	GO:0009506|plasmodesma(IDA)	other cellular components	C	GO:0005618|cell wall(IDA)	cell wall	P	GO:0006412|translation(ISS)	other metabolic processes	C	GO:0022626|cytosolic ribosome(IDA)	cytosol	C	GO:0005840|ribosome(ISS)	ribosome	P	GO:0042254|ribosome biogenesis(ISS)	other biological processes	C	GO:0022627|cytosolic small ribosomal subunit(IDA)	other cytoplasmic components	P	GO:0042545|cell wall modification(RCA)	other cellular processes	C	GO:0022626|cytosolic ribosome(IDA)	other intracellular components	C
AT5G55840	C	GO:0005739|mitochondrion(ISM)	mitochondria
AT1G44760	P	GO:0002238|response to molecule of fungal origin(RCA)	response to abiotic or biotic stimulus
AT5G05370	F	GO:0008121|ubiquinol-cytochrome-c reductase activity(ISS)	transporter activity	C	GO:0005750|mitochondrial respiratory chain complex III(IDA)	other membranes	C	GO:0005750|mitochondrial respiratory chain complex III(IDA)	other intracellular components	C	GO:0005739|mitochondrion(ISM)	mitochondria	C	GO:0005750|mitochondrial respiratory chain complex III(IDA)	other cytoplasmic components	F	GO:0008121|ubiquinol-cytochrome-c reductase activity(ISS)	other enzyme activity	C	GO:0005750|mitochondrial respiratory chain complex III(IDA)	mitochondria
AT5G15300	C	GO:0005739|mitochondrion(ISM)	mitochondria	P	GO:0008150|biological_process(ND)	unknown biological processes	F	GO:0003674|molecular_function(ND)	unknown molecular functions
AT1G17880	P	GO:0009651|response to salt stress(IEP)	response to abiotic or biotic stimulus	C	GO:0005634|nucleus(ISM)	nucleus	F	GO:0003700|sequence-specific DNA binding transcription factor activity(ISS)	transcription factor activity	P	GO:0009651|response to salt stress(IEP)	response to stress	F	GO:0005515|protein binding(IPI)	protein binding
AT5G16360	C	GO:0005575|cellular_component(ND)	unknown cellular components	P	GO:0008150|biological_process(ND)	unknown biological processes
AT3G11050	P	GO:0010039|response to iron ion(RCA)	other biological processes	P	GO:0006879|cellular iron ion homeostasis(ISS)	other cellular processes	P	GO:0009737|response to abscisic acid(IEP)	other biological processes	P	GO:0006979|response to oxidative stress(IMP)	response to stress	P	GO:0015979|photosynthesis(RCA)	other metabolic processes	P	GO:0000302|response to reactive oxygen species(RCA)	response to stress	P	GO:0055072|iron ion homeostasis(RCA)	other biological processes	P	GO:0015979|photosynthesis(RCA)	other cellular processes	C	GO:0009507|chloroplast(ISS)	chloroplast	F	GO:0008199|ferric iron binding(ISS)	other binding	P	GO:0006826|iron ion transport(ISS)	transport	C	GO:0009507|chloroplast(ISM)	chloroplast
AT3G01820	P	GO:0006354|DNA-templated transcription, elongation(RCA)	other metabolic processes	P	GO:0006354|DNA-templated transcription, elongation(RCA)	transcription,DNA-dependent	P	GO:0006354|DNA-templated transcription, elongation(RCA)	other cellular processes	C	GO:0005739|mitochondrion(ISM)	mitochondria	F	GO:0019201|nucleotide kinase activity(ISS)	kinase activity
AT5G28380	C	GO:0005739|mitochondrion(ISM)	mitochondria	P	GO:0008150|biological_process(ND)	unknown biological processes
AT5G47930	C	GO:0022627|cytosolic small ribosomal subunit(IDA)	other cytoplasmic components	C	GO:0022627|cytosolic small ribosomal subunit(IDA)	cytosol	C	GO:0005737|cytoplasm(ISM)	other cytoplasmic components	F	GO:0003735|structural constituent of ribosome(ISS)	structural molecule activity	C	GO:0022626|cytosolic ribosome(IDA)	other cytoplasmic components	C	GO:0022626|cytosolic ribosome(IDA)	cytosol	C	GO:0022626|cytosolic ribosome(IDA)	ribosome	C	GO:0022626|cytosolic ribosome(IDA)	ribosome	P	GO:0006412|translation(ISS)	protein metabolism	C	GO:0022626|cytosolic ribosome(IDA)	other intracellular components	C	GO:0022627|cytosolic small ribosomal subunit(IDA)	ribosome	C	GO:0022627|cytosolic small ribosomal subunit(IDA)	other intracellular components	C	GO:0005886|plasma membrane(IDA)	plasma membrane	P	GO:0006412|translation(ISS)	other cellular processes	C	GO:0022626|cytosolic ribosome(IDA)	other cytoplasmic components	C	GO:0005840|ribosome(ISS)	ribosome	C
AT2G01260	C	GO:0005634|nucleus(ISM)	nucleus	C	GO:0005634|nucleus(ISM)	nucleus	P	GO:0008150|biological_process(ND)	unknown biological processes	F	GO:0003674|molecular_function(ND)	unknown molecular functions	C	GO:0005634|nucleus(ISM)	nucleus
AT5G08060	F	GO:0003674|molecular_function(ND)	unknown molecular functions	C	GO:0005739|mitochondrion(IDA)	mitochondria	C	GO:0005739|mitochondrion(IDA)	mitochondria	P	GO:0008150|biological_process(ND)	unknown biological processes
AT4G33170	C	GO:0005739|mitochondrion(ISM)	mitochondria
AT1G26762	P	GO:0008150|biological_process(ND)	unknown biological processes	F	GO:0003674|molecular_function(ND)	unknown molecular functions	C	GO:0005739|mitochondrion(ISM)	mitochondria
AT4G27340	No annotation
AT2G45930	C	GO:0005739|mitochondrion(ISM)	mitochondria	F	GO:0003674|molecular_function(ND)	unknown molecular functions	P	GO:0008150|biological_process(ND)	unknown biological processes
AT4G08390	C	GO:0009570|chloroplast stroma(IDA)	other cytoplasmic components	C	GO:0005739|mitochondrion(IDA)	mitochondria	C	GO:0009570|chloroplast stroma(ISS)	other intracellular components	C	GO:0016020|membrane(IDA)	other membranes	C	GO:0009570|chloroplast stroma(IDA)	other cytoplasmic components	C	GO:0009507|chloroplast(ISM)	chloroplast	C	GO:0009570|chloroplast stroma(IDA)	other intracellular components	C	GO:0009507|chloroplast(ISM)	chloroplast	C	GO:0009507|chloroplast(ISM)	chloroplast	C	GO:0009570|chloroplast stroma(ISS)	other cytoplasmic components	P	GO:0009735|response to cytokinin(IDA)	other biological processes	C	GO:0005739|mitochondrion(IDA)	mitochondria	C	GO:0005739|mitochondrion(IDA)	mitochondria	C	GO:0016020|membrane(IDA)	other membranes	C	GO:0009570|chloroplast stroma(IDA)	plastid	C	GO:0009507|chloroplast(ISM)	chloroplast	C
AT2G12646	P	GO:0008150|biological_process(ND)	unknown biological processes	F	GO:0003674|molecular_function(ND)	unknown molecular functions	C	GO:0005575|cellular_component(ND)	unknown cellular components
AT4G08760	C	GO:0005739|mitochondrion(ISM)	mitochondria	F	GO:0003674|molecular_function(ND)	unknown molecular functions	P	GO:0008150|biological_process(ND)	unknown biological processes
AT3G20330	P	GO:0006164|purine nucleotide biosynthetic process(RCA)	other cellular processes	F	GO:0016597|amino acid binding(ISS)	other binding	P	GO:0016036|cellular response to phosphate starvation(IEP)	other cellular processes	C	GO:0009570|chloroplast stroma(IDA)	plastid	P	GO:0009220|pyrimidine ribonucleotide biosynthetic process(IGI)	other metabolic processes	F	GO:0004070|aspartate carbamoyltransferase activity(IGI)	transferase activity	P	GO:0006164|purine nucleotide biosynthetic process(RCA)	other metabolic processes	F	GO:0005515|protein binding(IPI)	protein binding	C	GO:0009570|chloroplast stroma(IDA)	chloroplast	F	GO:0016743|carboxyl- or carbamoyltransferase activity(ISS)	transferase activity	P	GO:0009220|pyrimidine ribonucleotide biosynthetic process(RCA)	other metabolic processes	C	GO:0009570|chloroplast stroma(IDA)	other cytoplasmic components	C	GO:0009570|chloroplast stroma(IDA)	other cytoplasmic components	P	GO:0009220|pyrimidine ribonucleotide biosynthetic process(RCA)	other cellular processes	C	GO:0009570|chloroplast stroma(IDA)	plastid	C	GO:0009570|chloroplast stroma(IDA)	chloroplast	C
AT1G72340	P	GO:0006413|translational initiation(ISS)	other metabolic processes	P	GO:0006413|translational initiation(ISS)	other cellular processes	F	GO:0003743|translation initiation factor activity(IBA)	DNA or RNA binding	P	GO:0006446|regulation of translational initiation(IBA)	protein metabolism	F	GO:0005525|GTP binding(ISS)	other binding	C	GO:0009507|chloroplast(ISM)	chloroplast	C	GO:0005851|eukaryotic translation initiation factor 2B complex(ISS)	other cytoplasmic components	F	GO:0003743|translation initiation factor activity(ISS)	DNA or RNA binding	P	GO:0006413|translational initiation(ISS)	protein metabolism	C	GO:0005851|eukaryotic translation initiation factor 2B complex(ISS)	other intracellular components	P	GO:0006446|regulation of translational initiation(IBA)	other metabolic processes	F	GO:0005525|GTP binding(ISS)	nucleotide binding	F	GO:0005085|guanyl-nucleotide exchange factor activity(IBA)	other molecular functions	P	GO:0006446|regulation of translational initiation(IBA)	other cellular processes	C	GO:0005851|eukaryotic translation initiation factor 2B complex(IBA)	other cytoplasmic components	C	GO:0005851|eukaryotic translation initiation factor 2B complex(IBA)	other intracellular components	P
AT5G16470	P	GO:0006355|regulation of transcription, DNA-templated(TAS)	other cellular processes	P	GO:0007067|mitotic nuclear division(RCA)	other cellular processes	P	GO:0006355|regulation of transcription, DNA-templated(TAS)	other metabolic processes	F	GO:0003676|nucleic acid binding(ISS)	nucleic acid binding	P	GO:0071452|cellular response to singlet oxygen(IMP)	other cellular processes	P	GO:0006355|regulation of transcription, DNA-templated(TAS)	transcription,DNA-dependent	P	GO:0071452|cellular response to singlet oxygen(IMP)	response to stress	F	GO:0003700|sequence-specific DNA binding transcription factor activity(ISS)	transcription factor activity	F	GO:0008270|zinc ion binding(ISS)	other binding	P	GO:0007067|mitotic nuclear division(RCA)	cell organization and biogenesis
AT2G20360	P	GO:0009651|response to salt stress(IEP)	response to abiotic or biotic stimulus	C	GO:0005739|mitochondrion(IDA)	mitochondria	C	GO:0016020|membrane(IDA)	other membranes	C	GO:0005747|mitochondrial respiratory chain complex I(IDA)	other intracellular components	C	GO:0005747|mitochondrial respiratory chain complex I(IDA)	other membranes	P	GO:0080129|proteasome core complex assembly(RCA)	cell organization and biogenesis	C	GO:0005747|mitochondrial respiratory chain complex I(IDA)	mitochondria	P	GO:0009651|response to salt stress(IEP)	response to stress	P	GO:0006511|ubiquitin-dependent protein catabolic process(RCA)	protein metabolism	C	GO:0005739|mitochondrion(IDA)	mitochondria	P	GO:0006511|ubiquitin-dependent protein catabolic process(RCA)	other metabolic processes	P	GO:0006511|ubiquitin-dependent protein catabolic process(RCA)	other cellular processes	P	GO:0051788|response to misfolded protein(RCA)	response to stress	C	GO:0005739|mitochondrion(ISM)	mitochondria	P	GO:0009853|photorespiration(RCA)	other cellular processes	C	GO:0005739|mitochondrion(IDA)	mitochondria	C
AT2G39520	F	GO:0003674|molecular_function(ND)	unknown molecular functions	C	GO:0005739|mitochondrion(ISM)	mitochondria	P	GO:0008150|biological_process(ND)	unknown biological processes
AT2G17270	C	GO:0005739|mitochondrion(ISM)	mitochondria	P	GO:0009651|response to salt stress(IMP)	response to abiotic or biotic stimulus	C	GO:0005743|mitochondrial inner membrane(ISS)	other cytoplasmic components	P	GO:0006810|transport(ISS)	transport	C	GO:0005743|mitochondrial inner membrane(ISS)	other membranes	C	GO:0005743|mitochondrial inner membrane(ISS)	mitochondria	C	GO:0005743|mitochondrial inner membrane(ISS)	other intracellular components	P	GO:0009651|response to salt stress(IMP)	response to stress
AT1G34160	C	GO:0005739|mitochondrion(ISM)	mitochondria	P	GO:0008150|biological_process(ND)	unknown biological processes
AT4G23885	C	GO:0009507|chloroplast(ISM)	chloroplast	P	GO:0008150|biological_process(ND)	unknown biological processes	C	GO:0005739|mitochondrion(IDA)	mitochondria	F	GO:0003674|molecular_function(ND)	unknown molecular functions
AT4G13070	C	GO:0009507|chloroplast(ISM)	chloroplast	P	GO:0008150|biological_process(ND)	unknown biological processes
AT1G24380	P	GO:0008150|biological_process(ND)	unknown biological processes	C	GO:0005575|cellular_component(ND)	unknown cellular components	F	GO:0003674|molecular_function(ND)	unknown molecular functions
AT1G72070	C	GO:0005737|cytoplasm(ISM)	other cytoplasmic components	P	GO:0006457|protein folding(ISS)	protein metabolism	P	GO:0006457|protein folding(ISS)	other metabolic processes	P	GO:0006457|protein folding(ISS)	other cellular processes
AT5G52930	P	GO:0008150|biological_process(ND)	unknown biological processes	C	GO:0009507|chloroplast(ISM)	chloroplast	F	GO:0003674|molecular_function(ND)	unknown molecular functions
AT4G21980	F	GO:0019786|Atg8-specific protease activity(ISS)	hydrolase activity	F	GO:0019779|Atg8 activating enzyme activity(ISS)	other enzyme activity	P	GO:0050832|defense response to fungus(IEP)	response to abiotic or biotic stimulus	P	GO:0010286|heat acclimation(RCA)	response to stress	C	GO:0005776|autophagic vacuole(IDA)	other cytoplasmic components	P	GO:0010286|heat acclimation(RCA)	response to abiotic or biotic stimulus	C	GO:0009507|chloroplast(ISM)	chloroplast	C	GO:0005775|vacuolar lumen(NAS)	other intracellular components	P	GO:0006914|autophagy(ISS)	other cellular processes	C	GO:0005776|autophagic vacuole(IDA)	other intracellular components	C	GO:0005737|cytoplasm(IDA)	other cytoplasmic components	P	GO:0050832|defense response to fungus(IEP)	response to stress	C	GO:0005775|vacuolar lumen(NAS)	other cytoplasmic components	C	GO:0009507|chloroplast(ISM)	chloroplast	F	GO:0019776|Atg8 ligase activity(ISS)	other enzyme activity	P	GO:0006914|autophagy(ISS)	other metabolic processes	C
AT4G34700	C	GO:0005739|mitochondrion(IDA)	mitochondria	C	GO:0005774|vacuolar membrane(IDA)	other cytoplasmic components	P	GO:0009853|photorespiration(TAS)	other metabolic processes	C	GO:0005774|vacuolar membrane(IDA)	other membranes	C	GO:0005739|mitochondrion(ISM)	mitochondria	P	GO:0006511|ubiquitin-dependent protein catabolic process(RCA)	other cellular processes	C	GO:0031966|mitochondrial membrane(IDA)	other intracellular components	F	GO:0003824|catalytic activity(ISS)	other enzyme activity	C	GO:0031966|mitochondrial membrane(IDA)	other membranes	P	GO:0051788|response to misfolded protein(RCA)	response to stress	P	GO:0009853|photorespiration(RCA)	other metabolic processes	P	GO:0006511|ubiquitin-dependent protein catabolic process(RCA)	protein metabolism	P	GO:0006511|ubiquitin-dependent protein catabolic process(RCA)	other metabolic processes	C	GO:0005774|vacuolar membrane(IDA)	other intracellular components	P	GO:0005975|carbohydrate metabolic process(IMP)	other metabolic processes	P	GO:0009853|photorespiration(RCA)	other cellular processes	P
AT4G10880	P	GO:0008150|biological_process(ND)	unknown biological processes	C	GO:0005575|cellular_component(ND)	unknown cellular components	F	GO:0003674|molecular_function(ND)	unknown molecular functions
AT5G65570	P	GO:0008150|biological_process(ND)	unknown biological processes	C	GO:0005739|mitochondrion(ISM)	mitochondria
AT3G12290	P	GO:0009396|folic acid-containing compound biosynthetic process(ISS)	other metabolic processes	P	GO:0019344|cysteine biosynthetic process(RCA)	other metabolic processes	P	GO:0048193|Golgi vesicle transport(RCA)	transport	P	GO:0019344|cysteine biosynthetic process(RCA)	other cellular processes	F	GO:0003824|catalytic activity(ISS)	other enzyme activity	C	GO:0009507|chloroplast(IDA)	chloroplast	C	GO:0005829|cytosol(IDA)	cytosol	C	GO:0005737|cytoplasm(ISM)	other cytoplasmic components	P	GO:0030244|cellulose biosynthetic process(RCA)	other cellular processes	P	GO:0030244|cellulose biosynthetic process(RCA)	other metabolic processes	P	GO:0009396|folic acid-containing compound biosynthetic process(ISS)	other cellular processes
AT5G29070	P	GO:0008150|biological_process(ND)	unknown biological processes	F	GO:0003674|molecular_function(ND)	unknown molecular functions
AT3G07090	C	GO:0005737|cytoplasm(IDA)	other cytoplasmic components	C	GO:0005737|cytoplasm(ISM)	other cytoplasmic components	P	GO:0008150|biological_process(ND)	unknown biological processes	C	GO:0005634|nucleus(IDA)	nucleus	F	GO:0003674|molecular_function(ND)	unknown molecular functions
AT4G03740	C	GO:0005739|mitochondrion(ISM)	mitochondria	P	GO:0008150|biological_process(ND)	unknown biological processes	F	GO:0003674|molecular_function(ND)	unknown molecular functions
AT5G23900	C	GO:0022626|cytosolic ribosome(IDA)	ribosome	C	GO:0022626|cytosolic ribosome(IDA)	other cytoplasmic components	C	GO:0005737|cytoplasm(ISM)	other cytoplasmic components	P	GO:0042254|ribosome biogenesis(ISS)	other biological processes	C	GO:0022626|cytosolic ribosome(IDA)	other intracellular components	C	GO:0022626|cytosolic ribosome(IDA)	other cytoplasmic components	P	GO:0006412|translation(ISS)	other cellular processes	C	GO:0022625|cytosolic large ribosomal subunit(IDA)	cytosol	C	GO:0022626|cytosolic ribosome(IDA)	cytosol	C	GO:0022626|cytosolic ribosome(IDA)	cytosol	P	GO:0006412|translation(ISS)	other metabolic processes	P	GO:0006412|translation(ISS)	protein metabolism	C	GO:0022625|cytosolic large ribosomal subunit(IDA)	other cytoplasmic components	C	GO:0022625|cytosolic large ribosomal subunit(IDA)	ribosome	C	GO:0022626|cytosolic ribosome(IDA)	ribosome	C	GO:0022626|cytosolic ribosome(IDA)	other intracellular components	C
AT5G01080	C	GO:0005739|mitochondrion(ISM)	mitochondria
AT3G27380	P	GO:0006121|mitochondrial electron transport, succinate to ubiquinone(ISS)	electron transport or energy pathways	C	GO:0045281|succinate dehydrogenase complex(ISS)	other intracellular components	F	GO:0000104|succinate dehydrogenase activity(ISS)	other enzyme activity	C	GO:0005739|mitochondrion(IDA)	mitochondria	F	GO:0008270|zinc ion binding(IDA)	other binding	C	GO:0005739|mitochondrion(IDA)	mitochondria	C	GO:0005739|mitochondrion(IDA)	mitochondria	P	GO:0006121|mitochondrial electron transport, succinate to ubiquinone(ISS)	other cellular processes	C	GO:0045281|succinate dehydrogenase complex(ISS)	other membranes	C	GO:0005739|mitochondrion(ISM)	mitochondria	F	GO:0009055|electron carrier activity(ISS)	other molecular functions	C	GO:0005739|mitochondrion(IDA)	mitochondria	C	GO:0005739|mitochondrion(ISM)	mitochondria	P	GO:0006121|mitochondrial electron transport, succinate to ubiquinone(ISS)	other metabolic processes	C	GO:0005739|mitochondrion(IDA)	mitochondria
AT1G68930	C	GO:0005739|mitochondrion(ISM)	mitochondria	P	GO:0008150|biological_process(ND)	unknown biological processes	F	GO:0003674|molecular_function(ND)	unknown molecular functions
AT3G20898	C	GO:0005634|nucleus(ISM)	nucleus	F	GO:0003674|molecular_function(ND)	unknown molecular functions	P	GO:0008150|biological_process(ND)	unknown biological processes
AT2G47380	F	GO:0004129|cytochrome-c oxidase activity(ISS)	transporter activity	C	GO:0005739|mitochondrion(ISM)	mitochondria	C	GO:0005739|mitochondrion(IDA)	mitochondria	F	GO:0004129|cytochrome-c oxidase activity(ISS)	other enzyme activity
AT4G22930	F	GO:0004151|dihydroorotase activity(IGI)	hydrolase activity	F	GO:0004151|dihydroorotase activity(ISS)	hydrolase activity	C	GO:0009507|chloroplast(IDA)	chloroplast
AT4G33495	P	GO:0010102|lateral root morphogenesis(IMP)	developmental processes	C	GO:0009507|chloroplast(ISM)	chloroplast	P	GO:0008285|negative regulation of cell proliferation(IMP)	other cellular processes
AT1G29270	P	GO:0008150|biological_process(ND)	unknown biological processes	C	GO:0009507|chloroplast(ISM)	chloroplast	F	GO:0003674|molecular_function(ND)	unknown molecular functions
AT4G29540	C	GO:0005739|mitochondrion(IDA)	mitochondria	P	GO:0019408|dolichol biosynthetic process(RCA)	other cellular processes	P	GO:2001289|lipid X metabolic process(IMP)	other metabolic processes	P	GO:0019408|dolichol biosynthetic process(RCA)	other metabolic processes	F	GO:0008780|acyl-[acyl-carrier-protein]-UDP-N-acetylglucosamine O-acyltransferase activity(IDA)	transferase activity	C	GO:0005739|mitochondrion(IDA)	mitochondria	P	GO:2001289|lipid X metabolic process(IMP)	other cellular processes
AT1G58350	P	GO:0008150|biological_process(ND)	unknown biological processes
AT4G16700	F	GO:0004609|phosphatidylserine decarboxylase activity(IMP)	other enzyme activity	F	GO:0004609|phosphatidylserine decarboxylase activity(ISS)	other enzyme activity	C	GO:0005739|mitochondrion(IDA)	mitochondria	C	GO:0005739|mitochondrion(ISM)	mitochondria	C	GO:0005739|mitochondrion(IDA)	mitochondria
AT4G32210	C	GO:0005749|mitochondrial respiratory chain complex II, succinate dehydrogenase complex (ubiquinone)(IDA)	other cytoplasmic components	P	GO:0006121|mitochondrial electron transport, succinate to ubiquinone(TAS)	other metabolic processes	C	GO:0005739|mitochondrion(IDA)	mitochondria	C	GO:0005749|mitochondrial respiratory chain complex II, succinate dehydrogenase complex (ubiquinone)(ISS)	other intracellular components	P	GO:0006121|mitochondrial electron transport, succinate to ubiquinone(TAS)	electron transport or energy pathways	C	GO:0005749|mitochondrial respiratory chain complex II, succinate dehydrogenase complex (ubiquinone)(IDA)	other intracellular components	C	GO:0005749|mitochondrial respiratory chain complex II, succinate dehydrogenase complex (ubiquinone)(IDA)	other membranes	C	GO:0005749|mitochondrial respiratory chain complex II, succinate dehydrogenase complex (ubiquinone)(IDA)	mitochondria	C	GO:0005749|mitochondrial respiratory chain complex II, succinate dehydrogenase complex (ubiquinone)(ISS)	other cytoplasmic components	F	GO:0000104|succinate dehydrogenase activity(TAS)	other enzyme activity	C	GO:0016020|membrane(ISS)	other membranes	C	GO:0005749|mitochondrial respiratory chain complex II, succinate dehydrogenase complex (ubiquinone)(ISS)	other membranes	C	GO:0005886|plasma membrane(ISM)	plasma membrane	C	GO:0005749|mitochondrial respiratory chain complex II, succinate dehydrogenase complex (ubiquinone)(ISS)	mitochondria	P	GO:0006121|mitochondrial electron transport, succinate to ubiquinone(TAS)	other cellular processes
AT5G09600	C	GO:0005749|mitochondrial respiratory chain complex II, succinate dehydrogenase complex (ubiquinone)(IDA)	other intracellular components	P	GO:0006121|mitochondrial electron transport, succinate to ubiquinone(TAS)	other cellular processes	P	GO:0006121|mitochondrial electron transport, succinate to ubiquinone(TAS)	electron transport or energy pathways	F	GO:0000104|succinate dehydrogenase activity(TAS)	other enzyme activity	C	GO:0016020|membrane(ISS)	other membranes	C	GO:0005886|plasma membrane(ISM)	plasma membrane	C	GO:0005749|mitochondrial respiratory chain complex II, succinate dehydrogenase complex (ubiquinone)(ISS)	other membranes	P	GO:0006121|mitochondrial electron transport, succinate to ubiquinone(TAS)	other metabolic processes	C	GO:0005749|mitochondrial respiratory chain complex II, succinate dehydrogenase complex (ubiquinone)(ISS)	other intracellular components	C	GO:0005749|mitochondrial respiratory chain complex II, succinate dehydrogenase complex (ubiquinone)(ISS)	mitochondria	C	GO:0005749|mitochondrial respiratory chain complex II, succinate dehydrogenase complex (ubiquinone)(IDA)	mitochondria	C	GO:0005886|plasma membrane(ISM)	plasma membrane	C	GO:0005749|mitochondrial respiratory chain complex II, succinate dehydrogenase complex (ubiquinone)(ISS)	other cytoplasmic components	C	GO:0005886|plasma membrane(ISM)	plasma membrane	C	GO:0005749|mitochondrial respiratory chain complex II, succinate dehydrogenase complex (ubiquinone)(IDA)	other membranes	C	GO:0005749|mitochondrial respiratory chain complex II, succinate dehydrogenase complex (ubiquinone)(IDA)	other cytoplasmic components	C
[truncated: 2,306 more rows]
[truncated: 290 more columns]

## Sheet: Arabidopsis_mito_pred_GOMapMan
Supplementary Table S9. Lists of predicted Arabidopsis and potato mitochondrial proteins at estimated specificity level of 0.95. (B) Predicted Arabidopsis mitochondrial proteins with GOMapMan annotation.
Protein ID	GOMapMan Annotations
ATCG00050	protein.synthesis.ribosomal protein.prokaryotic.chloroplast.30S subunit.S16(29.2.1.1.1.1.16):Homologous to the bacterial ribosomal protein S16
[truncated: 3,204 more rows]

## Sheet: Potato_mito_pred_GOMapMan
Supplementary Table S9. Lists of predicted mitochondrial proteins in Arabidopsis and potato at estimated specificity level of 0.95. (C) Predicted potato mitochondrial proteins with GOMapMan annotation.
[truncated: 4,709 more rows]
